# Supplementary material for: Synthesis of quaternary carbon-centered indolo[1,2-a]quinazolinones and indazolo[1,2-a]indazolones via C–H functionalization
Source: Royal Society of Chemistry journal article supplement (doi:10.1039/d0cc07419e), 2020-12-18

# **Synthesis of Quaternary Carbon Centered Indolo[1,2-*a*]quinazolinones and Indazolo[1,2-*a*]indazolones via C-H Functionalization**

K. Gogoi<sup>†</sup>, B. R. Bora<sup>†</sup>, G. Borah<sup>§</sup>, B. Sarma<sup>‡</sup>, and S. Gogoi<sup>†,\*</sup>

<sup>†</sup>Applied Organic Chemistry, Chemical Sciences & Technology Division, CSIR-North East Institute of Science and Technology, Jorhat-785006, AcSIR, Ghaziabad-201002, India,

<sup>§</sup>Department of Chemistry, Dibrugarh University, Dibrugarh-786004, and <sup>‡</sup>Department of Chemical Sciences, Tezpur University, Tezpur-784028, India

## **Supporting Information**

| <b>Contents</b>              | <b>Page</b> |
|------------------------------|-------------|
| General Experimental         | 3           |
| Experimental Procedures      | 3-5         |
| Reference                    | 5-6         |
| Spectral and Analytical data | 6-22        |
| NMR spectra                  | 19-65       |

## 1. General Information

Melting points were measured with a Buchi B-540 melting point apparatus and are uncorrected. NMR spectra were recorded on Bruker Avance III 500 MHz FT NMR spectrometer using tetramethylsilane (TMS) as an internal standard. All the commercially available reagents were used directly as received. All experiments were monitored by thin layer chromatography experiment. TLC was performed on Merck TLC Silica gel 60 F254 precoated plates. Column chromatography was performed on silica gel (100-200 mesh, Merck). HRMS data were recorded by electron spray ionization with a Q-TOF mass analyzer.

## 2. Reaction Procedures

### 2.1 General procedure for the synthesis of 1-phenyl-1,2-dihydro-3*H*-indazol-3-ones (**1**)<sup>1</sup>

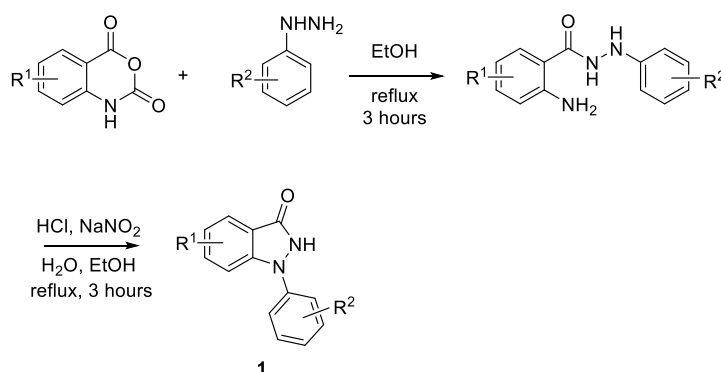

#### Scheme SI-1: Synthesis of indazolone derivatives **1**

To a stirred solution of isatoic anhydride (12.0 mmol) in ethanol (20 mL), phenylhydrazine (12.0 mmol) was added. The reaction mixture was refluxed for 2 hours and then it was allowed to cool to room temperature and kept standing at same temperature for 12 hours. The precipitated hydrazide was filtered out and washed with ethanol. Then, 25 mL of 1.0 M HCl was added into this hydrazide. To this slurry, NaNO<sub>2</sub> (18.0 mmol, in 10 mL water) was added and the reaction mixture was refluxed for three hours after adding 25 mL of ethanol. The solvent was reduced in vacuo and the reaction mixture was kept overnight. The solid formed was filtered out get the starting compound **1**.

### 2.2 General procedure for the synthesis of indoloquinazolinones **3** and indazoloindazolones **4**

A mixture of 1-phenyl-1,2-dihydro-3*H*-indazol-3-one (**1**, 0.1 mmol), alkyne (**2**, 0.1 mmol), [ $\text{RuCl}_2(p\text{-cymene})_2$ ] (5.0 mol %) and CsOAc (0.1 mmol) in *t*-AmOH (3.0 mL) was stirred at 95 °C under open air for 24 hours. The solvent *t*-AmOH was removed under vacuo and water

was added in to the crude reaction mixture which was then extracted with ethylacetate (25 mL x 2). The organic layer was then washed with brine and dried over anhydrous Na<sub>2</sub>SO<sub>4</sub>. The solvent was removed under vacuo and the crude product obtained was purified by silica gel (100-200 mesh) column chromatography using 20% EtOAc in hexane as the eluant to afford indoloquinazolinone derivatives **3** and indazoloindazolones **4**.

### 2.3 Gram scale synthesis of **3aa**

A mixture of **1a** (840 mg, 4.0 mmol), **2a** (712 mg, 4.0 mmol), [{RuCl<sub>2</sub>(*p*-cymene)}<sub>2</sub>] (122 mg, 5.0 mol %) and CsOAc (768 mg, 4.0 mmol) in *t*AmOH (25 mL) was stirred at 95 °C under open air for 24 hours. The solvent *t*AmOH was removed under vacuo and water was added in to the crude reaction mixture which was then extracted with ethylacetate (30 mL x 3). The organic layer was then washed with brine and dried over anhydrous Na<sub>2</sub>SO<sub>4</sub>. The solvent was removed under vacuo and the crude product obtained was purified by silica gel (100-200 mesh) column chromatography using 20% EtOAc in hexane as the eluant to afford **3aa** (1.16 g, 75%).

### 2.4 Synthesis of **4aj** in the presence of TEMPO

A mixture of **1a** (21 mg, 0.1 mmol), **2j** (11 mg, 0.1 mmol), [{RuCl<sub>2</sub>(*p*-cymene)}<sub>2</sub>] (3 mg, 5.0 mol %), TEMPO (16 mg, 0.1 mmol) and CsOAc (19 mg, 0.1 mmol) in *t*AmOH (3.0 mL) was stirred at 95 °C under open air for 24 hours. The solvent *t*AmOH was removed under vacuo and water was added in to the crude reaction mixture which was then extracted with ethylacetate (25 mL x 2). The organic layer was then washed with brine and dried over anhydrous Na<sub>2</sub>SO<sub>4</sub>. The solvent was removed under vacuo and the crude product obtained was purified by silica gel (100-200 mesh) column chromatography using 20% EtOAc in hexane as the eluant to afford **4aj** (8 mg, 23%).

### 2.4 D/H Exchange reaction for the synthesis of **1a-D**

A mixture of **1a** (21 mg, 0.1 mmol), [{RuCl<sub>2</sub>(*p*-cymene)}<sub>2</sub>] (3 mg, 5.0 mol %), and CsOAc (19 mg, 0.1 mmol) was stirred in D<sub>2</sub>O (3.0 mL, 95 °C) or CD<sub>3</sub>OD (3.0 mL, 60 °C) under argon for 24 hours. The solvent was removed under and the crude product obtained was purified by silica gel (100-200 mesh) column chromatography using 15-20% EtOAc in hexane as the eluant. The product did not show any H/D exchange.

### 2.5 General procedure for the synthesis of indolo[1,2-*a*]quinazolinones (**4aj'-al'**)

A mixture of **1a** (21 mg, 0.1 mmol), **2j-l** (0.1 mmol), [{RuCl<sub>2</sub>(*p*-cymene)}<sub>2</sub>] (3 mg, 5.0 mol %), and CsOAc (19 mg, 0.1 mmol) in *t*AmOH (3.0 mL) was stirred at 95 °C under open air for 3 hours. The solvent was removed under vacuo and the crude product obtained was

purified by silica gel (100-200 mesh) column chromatography using 20% EtOAc in hexane as the eluant to afford **4aj'-al'**.

## 2.6 Optimization of the reaction conditions for **3aa**<sup>a</sup> (Table SI-1)

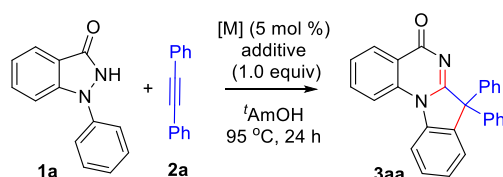

| entry           | catalyst                                                | additive                               | solvent       | <b>3aa</b> (%) <sup>b</sup> |
|-----------------|---------------------------------------------------------|----------------------------------------|---------------|-----------------------------|
| 1               | [RuCl <sub>2</sub> (PPh <sub>3</sub> ) <sub>3</sub> ]   | Cu(OAc) <sub>2</sub> .H <sub>2</sub> O | <i>t</i> AmOH | 0                           |
| 2               | [{RuCl <sub>2</sub> ( <i>p</i> -cymene)} <sub>2</sub> ] | Cu(OAc) <sub>2</sub> .H <sub>2</sub> O | <i>t</i> AmOH | 38                          |
| 3               | Pd(OAc) <sub>2</sub>                                    | Cu(OAc) <sub>2</sub> .H <sub>2</sub> O | <i>t</i> AmOH | 0                           |
| 4               | [(Cp* <i>Rh</i> Cl <sub>2</sub> ) <sub>2</sub> ]        | Cu(OAc) <sub>2</sub> .H <sub>2</sub> O | <i>t</i> AmOH | 0                           |
| 5               | [Cp* <i>Ir</i> Cl <sub>2</sub> ] <sub>2</sub>           | Cu(OAc) <sub>2</sub> .H <sub>2</sub> O | <i>t</i> AmOH | 0                           |
| 6               | [{RuCl <sub>2</sub> ( <i>p</i> -cymene)} <sub>2</sub> ] | CuBr <sub>2</sub>                      | <i>t</i> AmOH | 11                          |
| 7               | [{RuCl <sub>2</sub> ( <i>p</i> -cymene)} <sub>2</sub> ] | CsOAc                                  | <i>t</i> AmOH | 79                          |
| 8               | [{RuCl <sub>2</sub> ( <i>p</i> -cymene)} <sub>2</sub> ] | AgOAc                                  | <i>t</i> AmOH | 37                          |
| 9               | [{RuCl <sub>2</sub> ( <i>p</i> -cymene)} <sub>2</sub> ] | KOAc                                   | <i>t</i> AmOH | 31                          |
| 10              | [{RuCl <sub>2</sub> ( <i>p</i> -cymene)} <sub>2</sub> ] | CsOAc                                  | 1,4-dioxane   | 34                          |
| 11              | [{RuCl <sub>2</sub> ( <i>p</i> -cymene)} <sub>2</sub> ] | CsOAc                                  | acetonitrile  | 62                          |
| 12              | [{RuCl <sub>2</sub> ( <i>p</i> -cymene)} <sub>2</sub> ] | CsOAc                                  | DMF           | 41                          |
| 13              | [{RuCl <sub>2</sub> ( <i>p</i> -cymene)} <sub>2</sub> ] | CsOAc                                  | toluene       | 30                          |
| 14 <sup>c</sup> | [{RuCl <sub>2</sub> ( <i>p</i> -cymene)} <sub>2</sub> ] | CsOAc                                  | <i>t</i> AmOH | 51                          |
| 15 <sup>d</sup> | [{RuCl <sub>2</sub> ( <i>p</i> -cymene)} <sub>2</sub> ] | CsOAc                                  | <i>t</i> AmOH | 77                          |

<sup>a</sup>Reaction conditions: **1a** (0.1 mmol), **2a** (0.1 mmol), catalyst (5 mol %), additive (0.1 mmol) and *t*AmOH (3.0 mL) at 95 °C under air for 24 h. <sup>b</sup>Isolated yields. <sup>c</sup>Catalyst 2.5 mol %.

<sup>d</sup>Catalyst 7.5 mol %.

### References:

- (a) P. Singh, N. Kaur, P. Banerjee, *J. Org. Chem.* **2020**, *85*, 3393–3406. (b) W. Yang, R. Qiao, J. Chen, X. Huang, M. Liu, W. Gao, J. Ding, H. Wu, *J. Org. Chem.* **2015**, *80*,

### Spectral and analytical data of compounds **3** and **4**

|                                                                                                       |                                                                                                                                                                                                                                                                                                                                                                                                                                                                                                                                                                                                                                                                                                                                                                                                                                                                                                                                                                                                                                                                                                                                                                                                                                                                                                                                      |
|-------------------------------------------------------------------------------------------------------|--------------------------------------------------------------------------------------------------------------------------------------------------------------------------------------------------------------------------------------------------------------------------------------------------------------------------------------------------------------------------------------------------------------------------------------------------------------------------------------------------------------------------------------------------------------------------------------------------------------------------------------------------------------------------------------------------------------------------------------------------------------------------------------------------------------------------------------------------------------------------------------------------------------------------------------------------------------------------------------------------------------------------------------------------------------------------------------------------------------------------------------------------------------------------------------------------------------------------------------------------------------------------------------------------------------------------------------|
| 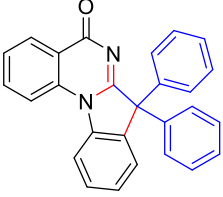 <p><b>3aa</b></p>   | <p><b>7,7-diphenylindolo[1,2-<i>a</i>]quinazolin-5(7<i>H</i>)-one (3aa):</b> The title compound was prepared by following the general procedure <b>2.2</b> from indazolone <b>1a</b> (21 mg, 0.1 mmol) and alkyne <b>2a</b> (18 mg, 0.1 mmol), which was then purified by column chromatography using 20% EtOAc in hexane to afford white solid of <b>3aa</b> (30 mg, 79%). M.p.: 266-268 °C. UV-vis (CHCl<sub>3</sub>) λ<sub>max</sub> 325 nm, ε<sub>max</sub> 3700. FTIR (CHCl<sub>3</sub>, cm<sup>-1</sup>) ν<sub>max</sub> 1656, 1598, 1554. <sup>1</sup>H NMR (500 MHz, CDCl<sub>3</sub>) δ 8.47 (dd, <i>J</i> = 7.9, 1.4 Hz, 1H), 8.26 (d, <i>J</i> = 8.5 Hz, 1H), 8.04 (d, <i>J</i> = 8.2 Hz, 1H), 7.85 (t, <i>J</i> = 8.7 Hz, 1H), 7.56 (t, <i>J</i> = 8.0 Hz, 1H), 7.52 (t, <i>J</i> = 7.5 Hz, 1H), 7.43 (dd, <i>J</i> = 7.6, 1.1 Hz, 1H), 7.36 (d, <i>J</i> = 8.5 Hz, 1H), 7.34-7.25 (m, 10H). <sup>13</sup>C NMR (125 MHz, CDCl<sub>3</sub>) δ 170.4, 168.7, 141.6, 139.8, 137.7, 136.2, 133.8, 129.6, 128.7, 128.4, 127.7, 127.6, 126.5, 125.9, 119.4, 115.0, 113.7, 63.2. HRMS (+ESI) Calcd for C<sub>27</sub>H<sub>19</sub>N<sub>2</sub>O [M+H]<sup>+</sup>: 387.1497; found: 387.1495. Anal. Calcd for C<sub>27</sub>H<sub>18</sub>N<sub>2</sub>O: C, 83.92; H, 4.69; N, 7.25. Found: C, 84.06; H, 4.97; N, 7.38.</p> |
|  <p><b>3ab</b></p> | <p><b>7,7-bis(4-methoxyphenyl)indolo[1,2-<i>a</i>]quinazolin-5(7<i>H</i>)-one (3ab):</b> The title compound was prepared by following the general procedure <b>2.2</b> from indazolone <b>1a</b> (21 mg, 0.1 mmol) and alkyne <b>2b</b> (24 mg, 0.1 mmol) which was then purified by column chromatography using 20% EtOAc in hexane to afford white solid of <b>3ab</b> (28 mg, 63%). M.p.: 269-271 °C. UV-vis (CHCl<sub>3</sub>) λ<sub>max</sub> 330 nm, ε<sub>max</sub> 9500. FTIR (CHCl<sub>3</sub>, cm<sup>-1</sup>) ν<sub>max</sub> 1657, 1595, 1556, 1461. <sup>1</sup>H NMR (500 MHz, CDCl<sub>3</sub>) δ 8.48 (d, <i>J</i> = 8.0 Hz, 1H), 8.24 (d, <i>J</i> = 8.0 Hz, 1H), 8.01 (d, <i>J</i> = 8.5 Hz, 1H), 7.83 (t, <i>J</i> = 7.0 Hz, 1H), 7.55 (t, <i>J</i> = 8.0 Hz, 1H), 7.50 (t, <i>J</i> = 8.0 Hz, 1H), 7.41 (d, <i>J</i> = 7.5 Hz, 1H), 7.34 (t, <i>J</i> = 7.5 Hz, 1H), 7.24 (d, <i>J</i> = 8.5 Hz, 4H), 6.80 (d, <i>J</i> = 8.5 Hz, 4H), 3.76 (s, 6H). <sup>13</sup>C NMR (125 MHz, CDCl<sub>3</sub>) δ 171.0, 168.8, 159.0, 139.6, 137.8, 136.9, 133.8,</p>                                                                                                                                                                                                                                                      |

|                                                                                                                                 |                                                                                                                                                                                                                                                                                                                                                                                                                                                                                                                                                                                                                                                                                                                                                                                                                                                                                                                                                                                                                                                                                                                                                                                                                                                                                                                                                                                                                              |
|---------------------------------------------------------------------------------------------------------------------------------|------------------------------------------------------------------------------------------------------------------------------------------------------------------------------------------------------------------------------------------------------------------------------------------------------------------------------------------------------------------------------------------------------------------------------------------------------------------------------------------------------------------------------------------------------------------------------------------------------------------------------------------------------------------------------------------------------------------------------------------------------------------------------------------------------------------------------------------------------------------------------------------------------------------------------------------------------------------------------------------------------------------------------------------------------------------------------------------------------------------------------------------------------------------------------------------------------------------------------------------------------------------------------------------------------------------------------------------------------------------------------------------------------------------------------|
|                                                                                                                                 | <p>133.7, 129.8, 129.6, 128.5, 127.4, 126.4, 125.9, 119.4, 114.9, 113.7, 113.6, 62.0, 55.2. HRMS (+ESI) Calcd for C<sub>29</sub>H<sub>23</sub>N<sub>2</sub>O<sub>3</sub> [M+H]<sup>+</sup>: 447.1709; found: 447.1703. Anal. Calcd for C<sub>29</sub>H<sub>22</sub>N<sub>2</sub>O<sub>3</sub>: C, 78.01; H, 4.97; N, 6.27. Found: C, 78.21; H, 4.90; N, 6.36.</p>                                                                                                                                                                                                                                                                                                                                                                                                                                                                                                                                                                                                                                                                                                                                                                                                                                                                                                                                                                                                                                                            |
| 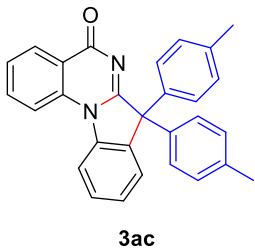 <p style="text-align: center;"><b>3ac</b></p> | <p><b>7,7-di-<i>p</i>-tolylindolo[1,2-<i>a</i>]quinazolin-5(7<i>H</i>)-one (3ac):</b> The title compound was prepared by following the general procedure <b>2.2</b> from indazolone <b>1a</b> (21 mg, 0.1 mmol) and alkyne <b>2c</b> (21 mg, 0.1 mmol) which was then purified by column chromatography using 20% EtOAc in hexane to afford a white solid of <b>3ac</b> (28 mg, 68%). M.p.: 266-268 °C. UV-vis (CHCl<sub>3</sub>) λ<sub>max</sub> 330 nm, ε<sub>max</sub> 4600. FTIR (CHCl<sub>3</sub>, cm<sup>-1</sup>) ν<sub>max</sub> 1656, 1594, 1555, 1460, 743. <sup>1</sup>H NMR (500 MHz, CDCl<sub>3</sub>) δ 8.46 (dd, <i>J</i> = 7.9, 1.4 Hz, 1H), 8.24 (d, <i>J</i> = 8.5 Hz, 1H), 8.01 (d, <i>J</i> = 8.2 Hz, 1H), 7.82 (t, <i>J</i> = 8.6 Hz, 1H), 7.55 (t, <i>J</i> = 7.5 Hz, 1H), 7.50 (t, <i>J</i> = 8.0 Hz, 1H), 7.42 (d, <i>J</i> = 7.5 Hz, 1H), 7.33 (t, <i>J</i> = 7.5 Hz, 1H), 7.20 (d, <i>J</i> = 8.5 Hz, 4H), 7.08 (d, <i>J</i> = 8.1 Hz, 4H), 2.30 (s, 6H). <sup>13</sup>C NMR (125 MHz, CDCl<sub>3</sub>) δ 171.0, 169.0, 140.1, 139.0, 138.1, 137.7, 137.0, 134.0, 129.9, 129.4, 128.9, 128.8, 127.8, 126.7, 126.2, 119.8, 115.2, 113.9, 63.0, 21.2. HRMS (+ESI) Calcd for C<sub>29</sub>H<sub>23</sub>N<sub>2</sub>O [M+H]<sup>+</sup>: 415.1810; found: 415.1817. Anal. Calcd for C<sub>29</sub>H<sub>22</sub>N<sub>2</sub>O: C, 84.03; H, 5.35; N, 6.76. Found: C, 83.93; H, 5.18; N, 6.51.</p> |

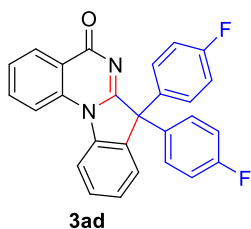

**7,7-bis(4-fluorophenyl)indolo[1,2-a]quinazolin-5(7H)-one**

**(3ad):** The title compound was prepared by following the general procedure **2.2** from indazolone **1a** (21 mg, 0.1 mmol) and alkyne **2d** (21 mg, 0.1 mmol) which was then purified by column chromatography using 20% EtOAc in hexane to afford white solid of **3ad** (24 mg, 57% yield). M.p.: 145–147 °C. UV-vis (CHCl<sub>3</sub>)  $\lambda_{\max}$  323 nm,  $\epsilon_{\max}$  10200. FTIR (CHCl<sub>3</sub>, cm<sup>-1</sup>)  $\nu_{\max}$  1656, 1596, 1553, 741. <sup>1</sup>H NMR (500 MHz, CDCl<sub>3</sub>)  $\delta$  8.48 (dd,  $J$  = 8.0, 1.4 Hz, 1H), 8.25 (d,  $J$  = 8.5 Hz, 1H), 8.05 (d,  $J$  = 8.3 Hz, 1H), 7.88-7.84 (m, 1H), 7.58 (t,  $J$  = 7.0 Hz, 1H), 7.56-7.53 (m, 1H), 7.40-7.35 (m, 2H), 7.31-7.27 (m, 4H), 7.00-6.95 (m, 4H). <sup>13</sup>C NMR (125 MHz, CDCl<sub>3</sub>)  $\delta$  169.3 (d,  $J$  = 203 Hz), 162.2 (d,  $J$  = 246.3 Hz), 139.7, 137.6, 137.2 (d,  $J$  = 3.8 Hz), 135.8, 134.0, 130.4 (d,  $J$  = 8.8 Hz), 129.7, 129.1, 127.3, 126.7, 126.1, 122.3, 119.4, 115.4 (d,  $J$  = 21.3 Hz), 113.8, 62.0. HRMS (+ESI) Calcd for C<sub>27</sub>H<sub>17</sub>F<sub>2</sub>N<sub>2</sub>O [M+H]<sup>+</sup>: 423.1309; found: 423.1313. Anal. Calcd for C<sub>27</sub>H<sub>16</sub>F<sub>2</sub>N<sub>2</sub>O: C, 76.77; H, 3.82; N, 6.63. Found: C, 76.92; H, 3.97; N, 6.45.

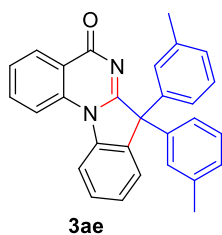

**7,7-di-*m*-tolyindolo[1,2-a]quinazolin-5(7H)-one (3ae):** The title compound was prepared by following the general procedure **2.2** from indazolone **1a** (21 mg, 0.1 mmol) and alkyne **2e** (21 mg, 0.1 mmol) which was then purified by column chromatography using 15% EtOAc in hexane to afford white solid of **3ae** (27 mg, 65%). M.p.: 196–198 °C. UV-vis (CHCl<sub>3</sub>)  $\lambda_{\max}$  330 nm,  $\epsilon_{\max}$  3800. FTIR (CHCl<sub>3</sub>, cm<sup>-1</sup>)  $\nu_{\max}$  1656, 1598, 1552, 743. <sup>1</sup>H NMR (500 MHz, CDCl<sub>3</sub>)  $\delta$  8.47 (dd,  $J$  = 7.9, 1.5 Hz, 1H), 8.26 (d,  $J$  = 8.5 Hz, 1H), 8.03 (d,  $J$  = 8.2 Hz, 1H), 7.84 (t,  $J$  = 8.7 Hz, 1H), 7.56 (t,  $J$  = 7.0 Hz, 1H), 7.51 (t,  $J$  = 7.0 Hz, 1H), 7.42 (dd,  $J$  = 7.6, 1.1 Hz, 1H), 7.35 (t,  $J$  = 7.5 Hz, 1H), 7.20-7.05 (m, 8H), 2.26 (s, 6H). <sup>13</sup>C NMR (125 MHz, CDCl<sub>3</sub>)  $\delta$  170.5, 168.8, 141.5, 139.7, 138.0, 137.8, 136.5, 133.8, 129.6, 129.2, 128.6, 128.5, 128.2, 127.5, 126.4, 125.9, 125.9, 119.5, 115.0, 113.6, 63.2, 21.5. HRMS (+ESI) Calcd for C<sub>29</sub>H<sub>23</sub>N<sub>2</sub>O [M+H]<sup>+</sup>: 415.1810; found:



|                                                                                                       |                                                                                                                                                                                                                                                                                                                                                                                                                                                                                                                                                                                                                                                                                                                                                                                                                                                                                                                                                                                                                                                                                                                                                                                                                                                                                                                                                                                                                                         |
|-------------------------------------------------------------------------------------------------------|-----------------------------------------------------------------------------------------------------------------------------------------------------------------------------------------------------------------------------------------------------------------------------------------------------------------------------------------------------------------------------------------------------------------------------------------------------------------------------------------------------------------------------------------------------------------------------------------------------------------------------------------------------------------------------------------------------------------------------------------------------------------------------------------------------------------------------------------------------------------------------------------------------------------------------------------------------------------------------------------------------------------------------------------------------------------------------------------------------------------------------------------------------------------------------------------------------------------------------------------------------------------------------------------------------------------------------------------------------------------------------------------------------------------------------------------|
|                                                                                                       | <p>415.1803. Anal. Calcd for C<sub>29</sub>H<sub>22</sub>N<sub>2</sub>O: C, 84.03; H, 5.35; N, 6.76. Found: C, 84.08; H, 5.60; N, 6.89.</p>                                                                                                                                                                                                                                                                                                                                                                                                                                                                                                                                                                                                                                                                                                                                                                                                                                                                                                                                                                                                                                                                                                                                                                                                                                                                                             |
| 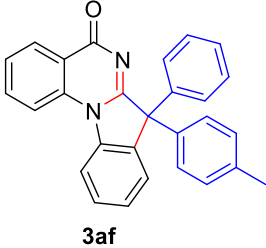 <p><b>3af</b></p>   | <p><b>7-phenyl-7-(p-tolyl)indolo[1,2-a]quinazolin-5(7H)-one (3af):</b> The title compound was prepared by following the general procedure <b>2.2</b> from indazolone <b>1a</b> (21 mg, 0.1 mmol) and alkyne <b>2f</b> (19 mg, 0.1 mmol) which was then purified by column chromatography using 20% EtOAc in hexane to afford white solid of <b>3af</b> (27 mg, 67%). M.p.: 255–257 °C. UV-vis (CHCl<sub>3</sub>) λ<sub>max</sub> 320 nm, ε<sub>max</sub> 3400. FTIR (CHCl<sub>3</sub>, cm<sup>-1</sup>) ν<sub>max</sub> 1659, 1598, 1554, 740. <sup>1</sup>H NMR (500 MHz, CDCl<sub>3</sub>) δ 8.46 (d, <i>J</i> = 7.9 Hz, 1H), 8.25 (d, <i>J</i> = 8.5 Hz, 1H), 8.03 (d, <i>J</i> = 8.2 Hz, 1H), 7.83 (t, <i>J</i> = 7.0 Hz, 1H), 7.55 (t, <i>J</i> = 7.0 Hz, 1H), 7.51 (t, <i>J</i> = 8.5 Hz, 1H), 7.42 (d, <i>J</i> = 7.5 Hz, 1H), 7.35 (d, <i>J</i> = 7.5 Hz, 1H), 7.33-7.24 (m, 5H), 7.23 (d, <i>J</i> = 9.5 Hz, 2H), 7.09 (d, <i>J</i> = 9.4 Hz, 2H), 2.30 (s, 3H). <sup>13</sup>C NMR (125 MHz, CDCl<sub>3</sub>) δ 170.7, 168.9, 141.9, 139.9, 138.6, 137.9, 137.7, 136.5, 133.9, 129.7, 129.2, 128.8, 128.8, 128.5, 127.7, 127.6, 126.6, 126.0, 119.6, 115.1, 113.8, 63.1, 21.1. HRMS (+ESI) Calcd for C<sub>28</sub>H<sub>21</sub>N<sub>2</sub>O [M+H]<sup>+</sup>: 401.1654; found: 401.1473. Anal. Calcd for C<sub>28</sub>H<sub>20</sub>N<sub>2</sub>O: C, 83.98; H, 5.03; N, 7.00. Found: C, 83.80; H, 4.92; N, 6.83.</p> |
|  <p><b>3ag</b></p> | <p><b>7-(4-fluorophenyl)-7-(p-tolyl)indolo[1,2-a]quinazolin-5(7H)-one (3ag):</b> The title compound was prepared by following the general procedure <b>2.2</b> from indazolone <b>1a</b> (21 mg, 0.1 mmol) and alkyne <b>2g</b> (21 mg, 0.1 mmol) which was then purified by column chromatography using 20% EtOAc in hexane to afford white solid of <b>3ag</b> (27 mg, 64%). M.p.: 263–265°C. UV-vis (CHCl<sub>3</sub>) λ<sub>max</sub> 330 nm, ε<sub>max</sub> 3300. FTIR (CHCl<sub>3</sub>, cm<sup>-1</sup>) ν<sub>max</sub> 1652, 1598, 1557. <sup>1</sup>H NMR (500 MHz, CDCl<sub>3</sub>) δ 8.47 (dd, <i>J</i> = 7.9, 1.5 Hz, 1H), 8.25 (d, <i>J</i> = 8.5 Hz, 1H), 8.03 (d, <i>J</i> = 8.2 Hz, 1H), 7.84 (t, <i>J</i> = 8.7 Hz, 1H), 7.56 (t, <i>J</i> = 8.0 Hz, 1H), 7.52 (t, <i>J</i> = 8.0 Hz, 1H), 7.40 (d, <i>J</i> = 7.5 Hz, 1H), 7.35 (t, <i>J</i> = 8.0 Hz, 1H), 7.32-7.26 (m, 2H), 7.19 (d, <i>J</i> = 8.3 Hz, 2H), 7.09 (d, <i>J</i> = 8.1 Hz, 2H), 6.97 (t, <i>J</i> = 8.7 Hz, 2H), 2.30 (s, 3H). <sup>13</sup>C NMR (125 MHz, CDCl<sub>3</sub>) δ 170.4,</p>                                                                                                                                                                                                                                                                                                                                                        |

|                                                                                                       |                                                                                                                                                                                                                                                                                                                                                                                                                                                                                                                                                                                                                                                                                                                                                                                                                                                                                                                                                                                                                                                                                                                                                                                                                                                                                                                                                                                                                                                                                                                               |
|-------------------------------------------------------------------------------------------------------|-------------------------------------------------------------------------------------------------------------------------------------------------------------------------------------------------------------------------------------------------------------------------------------------------------------------------------------------------------------------------------------------------------------------------------------------------------------------------------------------------------------------------------------------------------------------------------------------------------------------------------------------------------------------------------------------------------------------------------------------------------------------------------------------------------------------------------------------------------------------------------------------------------------------------------------------------------------------------------------------------------------------------------------------------------------------------------------------------------------------------------------------------------------------------------------------------------------------------------------------------------------------------------------------------------------------------------------------------------------------------------------------------------------------------------------------------------------------------------------------------------------------------------|
|                                                                                                       | <p>168.6, 162.1 (d, <math>J = 246.1</math> Hz), 161.2, 139.7, 138.5, 137.7 (d, <math>J = 3.8</math> Hz), 137.4 (d, <math>J = 3.3</math> Hz), 136.2, 133.8, 130.5 (d, <math>J = 8.8</math> Hz), 129.6, 129.2, 128.8, 128.4, 127.4, 126.5, 126.0, 119.4, 115.3 (d, <math>J = 21.3</math> Hz), 115.0 (d, <math>J = 23.8</math> Hz), 115.0, 113.7, 62.3, 20.9. HRMS (+ESI) Calcd for <math>C_{28}H_{20}FN_2O</math> <math>[M+H]^+</math>: 419.1560; found: 419.1580. Anal. Calcd for <math>C_{28}H_{19}FN_2O</math>: C, 80.37; H, 4.58; N, 6.69. Found: C, 80.43; H, 4.66; N, 6.74.</p>                                                                                                                                                                                                                                                                                                                                                                                                                                                                                                                                                                                                                                                                                                                                                                                                                                                                                                                                           |
| 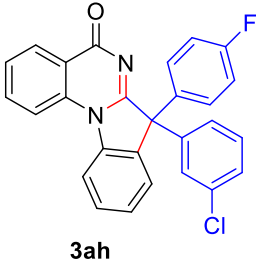 <p><b>3ah</b></p>  | <p><b>7-(3-chlorophenyl)-7-(4-fluorophenyl)indolo[1,2-a]quinazolin-5(7H)-one (3ah):</b> The title compound was prepared by following the general procedure <b>2.2</b> from indazolone <b>1a</b> (21 mg, 0.1 mmol) and alkyne <b>2h</b> (23 mg, 0.1 mmol) which was then purified by column chromatography using 20% EtOAc in hexane to afford white solid of <b>3ah</b> (21 mg, 48%). M.p.: 156–159 °C. UV-vis (<math>CHCl_3</math>) <math>\lambda_{max}</math> 330 nm, <math>\epsilon_{max}</math> 4000. FTIR (<math>CHCl_3</math>, <math>cm^{-1}</math>) <math>\nu_{max}</math> 1656, 1596, 1554. <math>^1H</math> NMR (500 MHz, <math>CDCl_3</math>) <math>\delta</math> 8.45 (d, <math>J = 8.0</math> Hz, 1H), 8.34 (s, 1H), 8.18 (d, <math>J = 8.5</math> Hz, 1H), 8.03 (d, <math>J = 8.2</math> Hz, 1H), 7.83 (t, <math>J = 7.9</math> Hz, 1H), 7.60–7.50 (m, 2H), 7.37 (t, <math>J = 7.5</math> Hz, 1H), 7.29–7.17 (m, 7H), 7.04 (d, <math>J = 7.6</math> Hz, 1H). <math>^{13}C</math> NMR (125 MHz, <math>CDCl_3</math>) <math>\delta</math> 170.3, 168.6, 162.7 (d, <math>J = 245.0</math> Hz), 141.3, 139.4, 137.8, 133.9 (d, <math>J = 12.5</math> Hz), 133.3 (d, <math>J = 2.5</math> Hz), 131.7, 131.1, 129.6, 129.1, 126.2, 126.5, 126.4, 125.6, 119.3, 116.3, 115.2, 113.3, 61.9. HRMS (+ESI) Calcd for <math>C_{27}H_{17}ClFN_2O</math> <math>[M+H]^+</math>: 439.1013; found: 439.1017. Anal. Calcd for <math>C_{27}H_{16}ClFN_2O</math>: C, 73.89; H, 3.67; N, 6.38. Found: C, 74.06; H, 3.54; N, 6.61.</p> |
|  <p><b>3ai</b></p> | <p><b>7-phenyl-7-(thiophen-2-yl)indolo[1,2-a]quinazolin-5(7H)-one (3ai):</b> The title compound was prepared by following the general procedure <b>2.2</b> from indazolone <b>1a</b> (21 mg, 0.1 mmol) and alkyne <b>2i</b> (20 mg, 0.1 mmol) which was then purified by column chromatography using 20% EtOAc in hexane to afford light yellow solid of <b>3ai</b> (21 mg, 51%). M.p.: 208–210°C. UV-vis (<math>CHCl_3</math>) <math>\lambda_{max}</math> 315 nm, <math>\epsilon_{max}</math> 3200. FTIR (<math>CHCl_3</math>, <math>cm^{-1}</math>) <math>\nu_{max}</math> 1656, 1598, 1554. <math>^1H</math> NMR (500 MHz, <math>CDCl_3</math>) <math>\delta</math> 8.48 (dd, <math>J = 8.0, 1.4</math></p>                                                                                                                                                                                                                                                                                                                                                                                                                                                                                                                                                                                                                                                                                                                                                                                                                |

|                                                                                                       |                                                                                                                                                                                                                                                                                                                                                                                                                                                                                                                                                                                                                                                                                                                                                                                                                                                                                                                                                                                                                                                                                                                                                                                                                                                                                                                                                                                                                                                                                                                          |
|-------------------------------------------------------------------------------------------------------|--------------------------------------------------------------------------------------------------------------------------------------------------------------------------------------------------------------------------------------------------------------------------------------------------------------------------------------------------------------------------------------------------------------------------------------------------------------------------------------------------------------------------------------------------------------------------------------------------------------------------------------------------------------------------------------------------------------------------------------------------------------------------------------------------------------------------------------------------------------------------------------------------------------------------------------------------------------------------------------------------------------------------------------------------------------------------------------------------------------------------------------------------------------------------------------------------------------------------------------------------------------------------------------------------------------------------------------------------------------------------------------------------------------------------------------------------------------------------------------------------------------------------|
|                                                                                                       | <p>Hz, 1H), 8.25 (d, <math>J = 8.5</math> Hz, 1H), 8.02 (d, <math>J = 8.2</math> Hz, 1H), 7.85 (t, <math>J = 8.7</math>Hz, 1H), 7.60-7.52 (m, 3H), 7.38 (t, <math>J = 7.6</math> Hz, 1H), 7.29-7.26 (m, 1H), 7.21-7.16 (m, 3H), 7.08 (d, <math>J = 8.1</math> Hz, 2H), 6.97-6.95 (m, 1H), 2.30 (s, 3H). <math>^{13}\text{C}</math> NMR (125 MHz, <math>\text{CDCl}_3</math>) <math>\delta</math> 169.9, 168.7, 143.8, 139.8, 138.4, 138.0, 137.8, 136.6, 134.0, 129.8, 129.2, 128.3, 127.9, 127.3, 126.7, 126.66, 126.2, 126.0, 119.6, 115.1, 113.8, 60.2, 21.1. HRMS (+ESI) Calcd for <math>\text{C}_{26}\text{H}_{19}\text{N}_2\text{OS}</math> <math>[\text{M}+\text{H}]^+</math>: 407.1218; found: 407.1081. Anal. Calcd for <math>\text{C}_{26}\text{H}_{18}\text{N}_2\text{OS}</math>: C, 76.82; H, 4.46; N, 6.89. Found: C, 76.67; H, 4.41; N, 6.94.</p>                                                                                                                                                                                                                                                                                                                                                                                                                                                                                                                                                                                                                                                          |
| 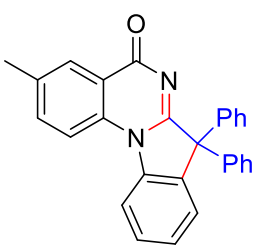 <p><b>3ba</b></p>  | <p><b>3-methyl-7,7-diphenylindolo[1,2-a]quinazolin-5(7H)-one (3ba):</b> The title compound was prepared by following the general procedure <b>2.2</b> from indazolone <b>1b</b> (22 mg, 0.1 mmol) and alkyne <b>2a</b> (18 mg, 0.1 mmol) which was then purified by column chromatography using 20% EtOAc in hexane to afford white solid of <b>3ba</b> (27 mg, 68%). M.p.: 301–303 °C. UV-vis (<math>\text{CHCl}_3</math>) <math>\lambda_{\text{max}}</math> 335 nm, <math>\epsilon_{\text{max}}</math> 3850. FTIR (<math>\text{CHCl}_3</math>, <math>\text{cm}^{-1}</math>) <math>\nu_{\text{max}}</math> 1656, 1591, 1556. <math>^1\text{H}</math> NMR (500 MHz, <math>\text{CDCl}_3</math>) <math>\delta</math> 8.28 (d, <math>J = 1.0</math> Hz, 1H), 8.15 (d, <math>J = 8.6</math> Hz, 1H), 8.01 (d, <math>J = 8.2</math> Hz, 1H), 7.64 (dd, <math>J = 8.6, 1.7</math> Hz, 1H), 7.55-7.48 (m, 1H), 7.43 (dd, <math>J = 7.6, 1.0</math> Hz, 1H), 7.37-7.27 (m, 11H), 2.51 (s, 3H). <math>^{13}\text{C}</math> NMR (125 MHz, <math>\text{CDCl}_3</math>) <math>\delta</math> 170.0, 168.9, 141.8, 140.1, 136.8, 136.4, 135.8, 135.0, 129.3, 128.86, 128.8, 128.5, 127.8, 127.6, 125.9, 119.4, 115.0, 113.7, 63.3, 21.1. HRMS (+ESI) Calcd for <math>\text{C}_{28}\text{H}_{21}\text{N}_2\text{O}</math> <math>[\text{M}+\text{H}]^+</math>: 401.1654; found: 401.1667. Anal. Calcd for <math>\text{C}_{28}\text{H}_{20}\text{N}_2\text{O}</math>: C, 83.98; H, 5.03; N, 7.00. Found: C, 83.73; H, 5.18; N, 7.36.</p> |
|  <p><b>3ca</b></p> | <p><b>3-methoxy-7,7-diphenylindolo[1,2-a]quinazolin-5(7H)-one (3ca):</b> The title compound was prepared by following the general procedure <b>2.2</b> from indazolone <b>1c</b> (24 mg, 0.1 mmol) and alkyne <b>2a</b> (18 mg, 0.1 mmol) which was then purified by column chromatography using 20% EtOAc in hexane to afford white solid of <b>3ca</b> (25 mg, 60%). M.p.: 295–297°C. UV-vis (<math>\text{CHCl}_3</math>) <math>\lambda_{\text{max}}</math> 340 nm, <math>\epsilon_{\text{max}}</math> 4250. FTIR (<math>\text{CHCl}_3</math>, <math>\text{cm}^{-1}</math>) <math>\nu_{\text{max}}</math> 1656, 1596,</p>                                                                                                                                                                                                                                                                                                                                                                                                                                                                                                                                                                                                                                                                                                                                                                                                                                                                                              |

|                                                                                                                                   |                                                                                                                                                                                                                                                                                                                                                                                                                                                                                                                                                                                                                                                                                                                                                                                                                                                                                                                                                                                                                                                                                                                                                                                                                                                                                                                                                                                                                                                                                                                                                                                    |
|-----------------------------------------------------------------------------------------------------------------------------------|------------------------------------------------------------------------------------------------------------------------------------------------------------------------------------------------------------------------------------------------------------------------------------------------------------------------------------------------------------------------------------------------------------------------------------------------------------------------------------------------------------------------------------------------------------------------------------------------------------------------------------------------------------------------------------------------------------------------------------------------------------------------------------------------------------------------------------------------------------------------------------------------------------------------------------------------------------------------------------------------------------------------------------------------------------------------------------------------------------------------------------------------------------------------------------------------------------------------------------------------------------------------------------------------------------------------------------------------------------------------------------------------------------------------------------------------------------------------------------------------------------------------------------------------------------------------------------|
|                                                                                                                                   | <p>1561. <math>^1\text{H}</math> NMR (500 MHz, <math>\text{CDCl}_3</math>) <math>\delta</math> 8.21 (d, <math>J = 9.3</math> Hz, 1H), 8.00 (d, <math>J = 8.3</math> Hz, 1H), 7.89 (d, <math>J = 3.1</math> Hz, 1H), 7.53-7.49 (m, 1H), 7.45-7.41 (m, 2H), 7.37-7.24 (m, 11H), 3.94 (s, 3H). <math>^{13}\text{C}</math> NMR (125 MHz, <math>\text{CDCl}_3</math>) <math>\delta</math> 169.6, 169.0, 158.2, 141.9, 140.2, 136.7, 132.2, 129.1, 129.0, 128.7, 128.0, 127.8, 126.2, 123.9, 121.3, 117.0, 113.8, 109.6, 63.5, 56.2. HRMS (+ESI) Calcd for <math>\text{C}_{28}\text{H}_{21}\text{N}_2\text{O}_2</math> <math>[\text{M}+\text{H}]^+</math>: 417.1603; found: 417.1580. Anal. Calcd for <math>\text{C}_{28}\text{H}_{20}\text{N}_2\text{O}_2</math>: C, 80.75; H, 4.84; N, 6.73. Found: C, 80.88; H, 4.97; N, 6.92.</p>                                                                                                                                                                                                                                                                                                                                                                                                                                                                                                                                                                                                                                                                                                                                                    |
| 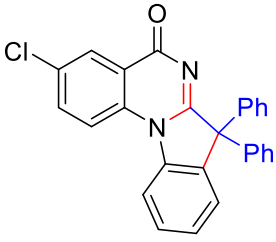 <p style="text-align: center;"><b>3da</b></p>   | <p><b>3-chloro-7,7-diphenylindolo[1,2-a]quinazolin-5(7H)-one (3da):</b><br/> The title compound was prepared by following the general procedure <b>2.2</b> from indazolone <b>1d</b> (24 mg, 0.1 mmol) and alkyne <b>2a</b> (18 mg, 0.1 mmol) which was then purified by column chromatography using 20% EtOAc in hexane to afford white solid of <b>3da</b> (24 mg, 57%). M.p.: 315-317 °C. UV-vis (<math>\text{CHCl}_3</math>) <math>\lambda_{\text{max}}</math> 328 nm, <math>\epsilon_{\text{max}}</math> 2350. FTIR (<math>\text{CHCl}_3</math>, <math>\text{cm}^{-1}</math>) <math>\nu_{\text{max}}</math> 1657, 1589, 1545. <math>^1\text{H}</math> NMR (500 MHz, <math>\text{CDCl}_3</math>) <math>\delta</math> 8.45 (d, <math>J = 2.5</math> Hz, 1H), 8.21 (d, <math>J = 9.0</math> Hz, 1H), 7.97 (d, <math>J = 8.0</math> Hz, 1H), 7.79 (dd, <math>J = 9.0</math> Hz, 2.5 Hz, 1H), 7.53 (t, <math>J = 7.5</math> Hz, 1H), 7.44 (d, <math>J = 7.5</math> Hz, 1H), 7.37 (t, <math>J = 7.5</math> Hz, 1H), 7.32-7.25 (m, 10H). <math>^{13}\text{C}</math> NMR (125 MHz, <math>\text{CDCl}_3</math>) <math>\delta</math> 170.7, 167.6, 141.5, 139.6, 136.3, 136.2, 134.0, 132.5, 129.2, 128.9, 128.8, 128.6, 127.9, 127.8, 127.5, 127.3, 126.3, 120.9, 116.7, 113.6, 63.3. HRMS (+ESI) Calcd for <math>\text{C}_{27}\text{H}_{18}\text{ClN}_2\text{O}</math> <math>[\text{M}+\text{H}]^+</math>: 421.1108; found: 421.1095. Anal. Calcd for <math>\text{C}_{27}\text{H}_{17}\text{ClN}_2\text{O}</math>: C, 77.05; H, 4.07; N, 6.66. Found: C, 76.83; H, 3.86; N, 6.92.</p> |
|  <p style="text-align: center;"><b>3ea</b></p> | <p><b>3-bromo-7,7-diphenylindolo[1,2-a]quinazolin-5(7H)-one(3ea):</b><br/> The title compound was prepared by following the general procedure <b>2.2</b> from indazolone <b>1e</b> (29 mg, 0.1 mmol) and alkyne <b>2a</b> (18 mg, 0.1 mmol) which was then purified by column chromatography using 20% EtOAc in hexane to afford white solid of <b>3ea</b> (27 mg, 58%). M.p.: 325-327°C. UV-vis (<math>\text{CHCl}_3</math>) <math>\lambda_{\text{max}}</math> 330 nm, <math>\epsilon_{\text{max}}</math> 3300. FTIR (<math>\text{CHCl}_3</math>, <math>\text{cm}^{-1}</math>) <math>\nu_{\text{max}}</math> 1655, 1590. <math>^1\text{H}</math></p>                                                                                                                                                                                                                                                                                                                                                                                                                                                                                                                                                                                                                                                                                                                                                                                                                                                                                                                              |

|                                                                                                       |                                                                                                                                                                                                                                                                                                                                                                                                                                                                                                                                                                                                                                                                                                                                                                                                                                                                                                                                                                                                                                                                                                                                                                                                                                 |
|-------------------------------------------------------------------------------------------------------|---------------------------------------------------------------------------------------------------------------------------------------------------------------------------------------------------------------------------------------------------------------------------------------------------------------------------------------------------------------------------------------------------------------------------------------------------------------------------------------------------------------------------------------------------------------------------------------------------------------------------------------------------------------------------------------------------------------------------------------------------------------------------------------------------------------------------------------------------------------------------------------------------------------------------------------------------------------------------------------------------------------------------------------------------------------------------------------------------------------------------------------------------------------------------------------------------------------------------------|
|                                                                                                       | <p>NMR (500 MHz, CDCl<sub>3</sub>) δ 8.61 (d, <i>J</i> = 2.4 Hz, 1H), 8.15 (d, <i>J</i> = 9.0 Hz, 1H), 7.96 (d, <i>J</i> = 8.3 Hz, 1H), 7.92 (dd, <i>J</i> = 9.0, 2.4 Hz, 1H), 7.53 (t, <i>J</i> = 9.0 Hz, 1H), 7.44 (d, <i>J</i> = 7.5 Hz, 1H), 7.37 (t, <i>J</i> = 7.5 Hz, 1H), 7.33-7.27 (m, 10H). <sup>13</sup>C NMR (125 MHz, CDCl<sub>3</sub>) δ 170.9, 167.7, 141.7, 139.7, 137.1, 136.8, 136.5, 132.5, 129.2, 129.0, 128.8, 128.1, 128.0, 126.5, 121.2, 120.2, 117.1, 113.9, 63.7. HRMS (+ESI) Calcd for C<sub>27</sub>H<sub>18</sub>BrN<sub>2</sub>O [M+H]<sup>+</sup>: 465.0602; found: 465.0428. Anal. Calcd for C<sub>27</sub>H<sub>17</sub>BrN<sub>2</sub>O: C, 69.69; H, 3.68; N, 6.02. Found: C, 69.90; H, 3.49; N, 5.80.</p>                                                                                                                                                                                                                                                                                                                                                                                                                                                                                    |
| 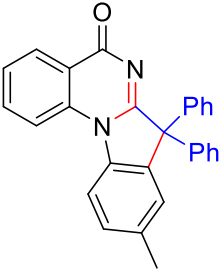 <p><b>3fa</b></p>  | <p><b>1-methyl-7,7-diphenylindolo[1,2-a]quinazolin-5(7H)-one (3fa):</b> The title compound was prepared by following the general procedure <b>2.2</b> from indazolone <b>1f</b> (22 mg, 0.1 mmol) and alkyne <b>2a</b> (18 mg, 0.1 mmol) which was then purified by column chromatography using 20% EtOAc in hexane to afford light brown solid of <b>3fa</b> (26 mg, 65%). M.p.: 246–248 °C. UV-vis (CHCl<sub>3</sub>) λ<sub>max</sub> 334 nm, ε<sub>max</sub> 1500. FTIR (CHCl<sub>3</sub>, cm<sup>-1</sup>) ν<sub>max</sub> 1656, 1598, 1589. <sup>1</sup>H NMR (500 MHz, CDCl<sub>3</sub>) δ 8.47 (d, <i>J</i> = 7.9 Hz, 1H), 8.27 (d, <i>J</i> = 8.6 Hz, 1H), 7.87-7.84 (m, 2H), 7.56 (t, <i>J</i> = 6.7 Hz, 1H), 7.33-7.27 (m, 11H), 7.16 (d, <i>J</i> = 7.6 Hz, 1H), 2.54 (s, 3H). <sup>13</sup>C NMR (125 MHz, CDCl<sub>3</sub>) δ 170.7, 168.7, 141.7, 139.9, 139, 137.8, 133.8, 133.3, 129.6, 128.7, 128.7, 128.4, 127.6, 127.1, 126.6, 126.4, 115.1, 114.4, 63.0, 22.0. HRMS (+ESI) Calcd for C<sub>28</sub>H<sub>21</sub>N<sub>2</sub>O [M+H]<sup>+</sup>:401.1654; found: 401.1659. Anal. Calcd for C<sub>28</sub>H<sub>20</sub>N<sub>2</sub>O: C, 83.98; H, 5.03; N, 7.00. Found: C, 84.26; H, 5.07; N, 7.28.</p> |
|  <p><b>3ga</b></p> | <p><b>9-methoxy-7,7-diphenylindolo[1,2-a]quinazolin-5(7H)-one (3ga):</b> The title compound was prepared by following the general procedure <b>2.2</b> from indazolone <b>1g</b> (24 mg, 0.1 mmol) and alkyne <b>2a</b> (18 mg, 0.1 mmol) which was then purified by column chromatography using 20% EtOAc in hexane to afford off white solid of <b>3ga</b> (24 mg, 58%). M.p.: 289–291 °C. UV-vis (CHCl<sub>3</sub>) λ<sub>max</sub> 338 nm, ε<sub>max</sub> 1250. FTIR (CHCl<sub>3</sub>, cm<sup>-1</sup>) ν<sub>max</sub> 1656, 1598, 1552. <sup>1</sup>H NMR (500 MHz, CDCl<sub>3</sub>) δ 8.46 (dd, <i>J</i> = 7.9, 1.4 Hz,</p>                                                                                                                                                                                                                                                                                                                                                                                                                                                                                                                                                                                           |

|                                                                                                       |                                                                                                                                                                                                                                                                                                                                                                                                                                                                                                                                                                                                                                                                                                                                                                                                                                                                                                                                                                                                                                                                                                                                                                                                                                                                                                                                                                                                                                                                                                                                                    |
|-------------------------------------------------------------------------------------------------------|----------------------------------------------------------------------------------------------------------------------------------------------------------------------------------------------------------------------------------------------------------------------------------------------------------------------------------------------------------------------------------------------------------------------------------------------------------------------------------------------------------------------------------------------------------------------------------------------------------------------------------------------------------------------------------------------------------------------------------------------------------------------------------------------------------------------------------------------------------------------------------------------------------------------------------------------------------------------------------------------------------------------------------------------------------------------------------------------------------------------------------------------------------------------------------------------------------------------------------------------------------------------------------------------------------------------------------------------------------------------------------------------------------------------------------------------------------------------------------------------------------------------------------------------------|
|                                                                                                       | <p>1H), 8.19 (d, <math>J = 8.5</math> Hz, 1H), 7.94 (d, <math>J = 8.9</math> Hz, 1H), 7.84-7.80 (m, 1H), 7.56-7.52 (m, 1H), 7.35-7.27 (m, 10H), 7.00 (dd, <math>J = 8.9, 2.7</math> Hz, 1H), 6.95 (d, <math>J = 2.7</math> Hz, 1H), 3.82 (s, 3H). <math>^{13}\text{C}</math> NMR (125 MHz, <math>\text{CDCl}_3</math>) <math>\delta</math> 170.1, 168.7, 157.7, 141.6, 138.0, 137.6, 133.7, 133.2, 129.6, 128.7, 128.4, 127.7, 126.3, 119.4, 114.7, 114.4, 113.8, 113.2, 63.5, 55.7. HRMS (+ESI) Calcd for <math>\text{C}_{28}\text{H}_{21}\text{N}_2\text{O}_2</math> <math>[\text{M}+\text{H}]^+</math>: 417.1603; found: 417.1590. Anal. Calcd for <math>\text{C}_{28}\text{H}_{20}\text{N}_2\text{O}_2</math>: C, 80.75; H, 4.84; N, 6.73. Found: C, 80.71; H, 4.83; N, 6.51.</p>                                                                                                                                                                                                                                                                                                                                                                                                                                                                                                                                                                                                                                                                                                                                                              |
| 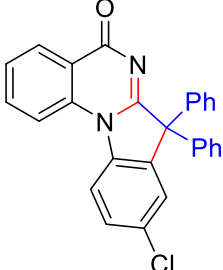 <p><b>3ha</b></p>  | <p><b>9-chloro-7,7-diphenylindolo[1,2-a]quinazolin-5(7H)-one (3ha):</b> The title compound was prepared by following the general procedure <b>2.2</b> from indazolone <b>1h</b> (24 mg, 0.1 mmol) and alkyne <b>2a</b> (18 mg, 0.1 mmol) which was then purified by column chromatography using 20% EtOAc in hexane to afford off white solid of <b>3ha</b> (22 mg, 53%). M.p.: 305–307 °C. UV-vis (<math>\text{CHCl}_3</math>) <math>\lambda_{\text{max}}</math> 340 nm, <math>\epsilon_{\text{max}}</math> 1050. FTIR (<math>\text{CHCl}_3</math>, <math>\text{cm}^{-1}</math>) <math>\nu_{\text{max}}</math> 1656, 1596, 1552. <math>^1\text{H}</math> NMR (500 MHz, <math>\text{CDCl}_3</math>) <math>\delta</math> 8.47 (dd, <math>J = 7.9, 1.5</math> Hz, 1H), 8.16 (d, <math>J = 8.5</math> Hz, 1H), 7.96 (d, <math>J = 8.7</math> Hz, 1H), 7.87-7.82 (m, 1H), 7.57 (t, <math>J = 7.6</math> Hz, 1H), 7.49 (dd, <math>J = 8.7, 2.2</math> Hz, 1H), 7.38 (d, <math>J = 2.2</math> Hz, 1H), 7.34-7.27 (m, 10H). <math>^{13}\text{C}</math> NMR (125 MHz, <math>\text{CDCl}_3</math>) <math>\delta</math> 170.0, 168.4, 140.9, 138.3, 138.1, 137.4, 133.9, 131.5, 129.8, 128.8, 128.6, 128.6, 128.0, 127.7, 126.7, 119.4, 114.7, 114.5, 63.2. HRMS (+ESI) Calcd for <math>\text{C}_{27}\text{H}_{18}\text{ClN}_2\text{O}</math> <math>[\text{M}+\text{H}]^+</math>: 421.1108; found: 421.1095. Anal. Calcd for <math>\text{C}_{27}\text{H}_{17}\text{ClN}_2\text{O}</math>: C, 77.05; H, 4.07; N, 6.66. Found: C, 76.82; H, 4.18; N, 6.40.</p> |
|  <p><b>3ia</b></p> | <p><b>9,10-dimethyl-7,7-diphenylindolo[1,2-a]quinazolin-5(7H)-one (3ia):</b> The title compound was prepared by following the general procedure <b>2.2</b> from indazolone <b>1i</b> (24 mg, 0.1 mmol) and alkyne <b>2a</b> (18 mg, 0.1 mmol) which was then purified by column chromatography using 20% EtOAc in hexane to afford white solid of <b>3ia</b> (26 mg, 64%). M.p.: 277–279 °C. UV-vis (<math>\text{CHCl}_3</math>) <math>\lambda_{\text{max}}</math> 333 nm, <math>\epsilon_{\text{max}}</math> 950. FTIR (<math>\text{CHCl}_3</math>, <math>\text{cm}^{-1}</math>) <math>\nu_{\text{max}}</math> 1657, 1601, 1547.</p>                                                                                                                                                                                                                                                                                                                                                                                                                                                                                                                                                                                                                                                                                                                                                                                                                                                                                                              |

|                                                                                                                                  |                                                                                                                                                                                                                                                                                                                                                                                                                                                                                                                                                                                                                                                                                                                                                                                                                                                                                                                                                                                                                                                                                                                                                                                                                                                                                                                                                                                                                                                                                                                                                                                                                                                                    |
|----------------------------------------------------------------------------------------------------------------------------------|--------------------------------------------------------------------------------------------------------------------------------------------------------------------------------------------------------------------------------------------------------------------------------------------------------------------------------------------------------------------------------------------------------------------------------------------------------------------------------------------------------------------------------------------------------------------------------------------------------------------------------------------------------------------------------------------------------------------------------------------------------------------------------------------------------------------------------------------------------------------------------------------------------------------------------------------------------------------------------------------------------------------------------------------------------------------------------------------------------------------------------------------------------------------------------------------------------------------------------------------------------------------------------------------------------------------------------------------------------------------------------------------------------------------------------------------------------------------------------------------------------------------------------------------------------------------------------------------------------------------------------------------------------------------|
|                                                                                                                                  | <p><math>^1\text{H}</math> NMR (500 MHz, <math>\text{CDCl}_3</math>) <math>\delta</math> 8.46 (dd, <math>J = 8.0, 1.4</math> Hz, 1H), 8.26 (d, <math>J = 8.5</math> Hz, 1H), 7.85-7.82 (m, 1H), 7.81 (s, 1H), 7.55 (t, <math>J = 7.0</math> Hz, 1H), 7.34-7.25 (m, 10H), 7.15 (s, 1H), 2.44 (s, 3H), 2.30 (s, 3H). <math>^{13}\text{C}</math> NMR (125 MHz, <math>\text{CDCl}_3</math>) <math>\delta</math> 170.5, 168.8, 141.9, 137.9, 137.8, 137.3, 134.6, 133.7, 133.6, 129.5, 128.7, 128.3, 128.2, 127.5, 126.3, 119.4, 115.0, 114.8, 63.1, 20.6, 19.8. HRMS (+ESI) Calcd for <math>\text{C}_{29}\text{H}_{23}\text{N}_2\text{O}[\text{M}+\text{H}]^+</math>: 415.1810; found: 415.1812. Anal. Calcd for <math>\text{C}_{29}\text{H}_{22}\text{N}_2\text{O}</math>: C, 84.03; H, 5.35; N, 6.76. Found: C, 84.34; H, 5.24; N, 6.50.</p>                                                                                                                                                                                                                                                                                                                                                                                                                                                                                                                                                                                                                                                                                                                                                                                                                         |
| 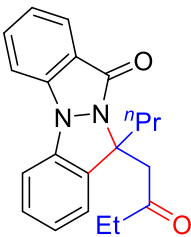 <p style="text-align: center;"><b>4aj</b></p> | <p><b>12-(2-oxobutyl)-12-propyl-10H,12H-indazolo[1,2-a]indazol-10-one (4aj):</b> The title compound was prepared by following the general procedure <b>2.2</b> from indazolone <b>1a</b> (21 mg, 0.1 mmol) and alkyne <b>2j</b> (11 mg, 0.1 mmol) which was then purified by column chromatography using 15% EtOAc in hexane to afford a brown thick liquid of <b>4aj</b> (21 mg, 62%). UV-vis (<math>\text{CHCl}_3</math>) <math>\lambda_{\text{max}}</math> 300 nm, <math>\epsilon_{\text{max}}</math> 13850. FTIR (<math>\text{CHCl}_3</math>, <math>\text{cm}^{-1}</math>) <math>\nu_{\text{max}}</math> 1719, 1656, 1608, 1501. <math>^1\text{H}</math> NMR (500 MHz, <math>\text{CDCl}_3</math>) <math>\delta</math> 7.87 (d, <math>J = 7.9</math> Hz, 1H), 7.61-7.58 (m, 1H), 7.49 (d, <math>J = 8.3</math> Hz, 1H), 7.38-7.34 (m, 1H), 7.26-7.28 (m, 1H), 7.20-7.14 (m, 2H), 7.06-7.03 (m, 1H), 4.04 (d, <math>J = 17.4</math> Hz, 1H), 3.26 (d, <math>J = 17.3</math> Hz, 1H), 2.58-2.52 (m, 1H), 2.42-2.26 (m, 2H), 2.01-1.94 (m, 1H), 1.27-1.10 (m, 1H), 1.06-0.98 (m, 1H), 0.83 (t, <math>J = 7.3</math> Hz, 6H). <math>^{13}\text{C}</math> NMR (125 MHz, <math>\text{CDCl}_3</math>) <math>\delta</math> 206.8, 159.0, 138.2, 136.7, 134.7, 131.8, 128.9, 124.3, 122.5, 122.1, 120.9, 119.5, 109.8, 107.9, 67.4, 47.2, 40.9, 36.4, 16.8, 13.6, 7.2. HRMS (+ESI) Calcd for <math>\text{C}_{21}\text{H}_{23}\text{N}_2\text{O}_2</math> <math>[\text{M}+\text{H}]^+</math>: 335.1759; found: 335.1758. Anal. Calcd for <math>\text{C}_{21}\text{H}_{22}\text{N}_2\text{O}_2</math>: C, 75.42; H, 6.63; N, 8.38. Found: C, 75.77; H, 6.41; N, 8.05.</p> |

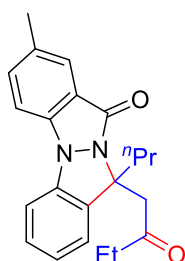

**4bj**

**8-methyl-12-(2-oxobutyl)-12-propyl-10H,12H-indazolo[1,2-*a*]indazol-10-one (4bj):** The title compound was prepared by following the general procedure **2.2** from indazolone **1b** (22 mg, 0.1 mmol) and alkyne **2j** (11 mg, 0.1 mmol) which was then purified by column chromatography using 15% EtOAc in hexane to afford a yellow gummy liquid of **4bj** (22 mg, 63%). UV-vis (CHCl<sub>3</sub>)  $\lambda_{\max}$  298 nm,  $\epsilon_{\max}$  3250. FTIR (CHCl<sub>3</sub>, cm<sup>-1</sup>)  $\nu_{\max}$  1719, 1656, 1500. NMR (400 MHz, )  $\delta$  7.64 (s, 1H), 7.40 (d, *J* = 3.9 Hz, 2H), 7.38-7.31 (m, 1H), 7.25-7.21 (m, 1H), 7.18 (d, *J* = 7.5 Hz, 1H), 7.02 (t, *J* = 7.5 Hz, 1H), 4.03 (d, *J* = 17.3 Hz, 1H), 3.24 (d, *J* = 17.3 Hz, 1H), 2.68-2.46 (m, 1H), 2.43 (s, 3H), 2.42-2.24 (m, 2H), 1.98-1.80 (m, 1H), 1.25-1.17 (m, 1H), 1.05-0.98 (m, 1H), 0.83 (t, *J* = 7.3 Hz, 6H). <sup>13</sup>C NMR (100 MHz, CDCl<sub>3</sub>)  $\delta$  207.1, 159.3, 142.0, 136.7, 134.8, 131.0, 127.9, 124.8, 122.5, 122.3, 119.8, 111.2, 107.9, 68.1, 48.5, 42.4, 37.5, 21.2, 18.1, 13.8, 7.4. HRMS (+ESI) Calcd for C<sub>22</sub>H<sub>25</sub>N<sub>2</sub>O<sub>2</sub> [M+H]<sup>+</sup>: 349.1916; found: 349.1920. Anal. Calcd for C<sub>22</sub>H<sub>24</sub>N<sub>2</sub>O<sub>2</sub>: C, 75.83; H, 6.94; N, 8.04. Found: C, 75.49; H, 7.27; N, 8.16.

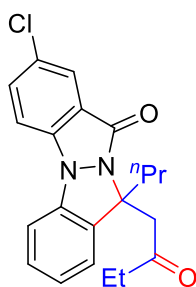

**4dj**

**8-chloro-12-(2-oxobutyl)-12-propyl-10H,12H-indazolo[1,2-*a*]indazol-10-one (4dj):** The title compound was prepared by following the general procedure **2.2** from indazolone **1d** (24 mg, 0.1 mmol) and alkyne **2j** (11 mg, 0.1 mmol) which was then purified by column chromatography using 15% EtOAc in hexane to afford yellow gummy liquid of **4dj** (20 mg, 54%). UV-vis (CHCl<sub>3</sub>)  $\lambda_{\max}$  304 nm,  $\epsilon_{\max}$  4800. FTIR (CHCl<sub>3</sub>, cm<sup>-1</sup>)  $\nu_{\max}$  1719, 1656, 1493. <sup>1</sup>H NMR (500 MHz, CDCl<sub>3</sub>)  $\delta$  7.83 (d, *J* = 2.0 Hz, 1H), 7.54 (dd, *J* = 8.7, 2.0 Hz, 1H), 7.43 (dd, *J* = 8.7, 0.4 Hz, 1H), 7.38-7.34 (m, 1H), 7.23 (d, *J* = 7.8 Hz, 1H), 7.19-7.17 (m, 1H), 7.08-7.05 (m, 1H), 4.06 (d, *J* = 17.6 Hz, 1H), 3.22 (d, *J* = 17.6 Hz, 1H), 2.53-2.47 (m, 1H), 2.41-2.24 (m, 2H), 1.98-1.92 (m, 1H), 1.30-1.20 (m, 1H), 1.05-0.99 (m, 1H), 0.83 (t, *J* = 7.7 Hz, 6H). <sup>13</sup>C NMR (125 MHz, CDCl<sub>3</sub>)  $\delta$  206.8, 158.1, 136.6, 136.4, 134.7, 132.2, 129.01, 126.5, 123.9, 122.9, 122.0, 120.5, 110.9,



|                                                                                                                                   |                                                                                                                                                                                                                                                                                                                                                                                                                                                                                                                                                                                                                                                                                                                                                                                                                                                                                                                                                                                                                                                                                                                                                                                                                                                                                                                                                                                |
|-----------------------------------------------------------------------------------------------------------------------------------|--------------------------------------------------------------------------------------------------------------------------------------------------------------------------------------------------------------------------------------------------------------------------------------------------------------------------------------------------------------------------------------------------------------------------------------------------------------------------------------------------------------------------------------------------------------------------------------------------------------------------------------------------------------------------------------------------------------------------------------------------------------------------------------------------------------------------------------------------------------------------------------------------------------------------------------------------------------------------------------------------------------------------------------------------------------------------------------------------------------------------------------------------------------------------------------------------------------------------------------------------------------------------------------------------------------------------------------------------------------------------------|
|                                                                                                                                   | <p>107.9, 67.6, 46.8, 41.0, 36.4, 16.8, 13.6, 7.2. HRMS (+ESI) Calcd for C<sub>21</sub>H<sub>22</sub>ClN<sub>2</sub>O<sub>2</sub> [M+H]<sup>+</sup>: 369.1369; found: 369.1361. Anal. Calcd for C<sub>21</sub>H<sub>21</sub>ClN<sub>2</sub>O<sub>2</sub>: C, 68.38; H, 5.74; N, 7.59. Found: C, 68.47; H, 5.71; N, 7.90.</p>                                                                                                                                                                                                                                                                                                                                                                                                                                                                                                                                                                                                                                                                                                                                                                                                                                                                                                                                                                                                                                                   |
| 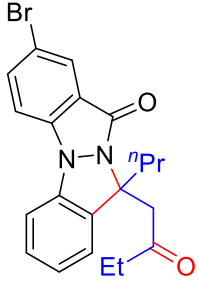 <p style="text-align: center;"><b>4ej</b></p>   | <p><b>8-bromo-12-(2-oxobutyl)-12-propyl-10H,12H-indazolo[1,2-a]indazol-10-one (4ej):</b> The title compounds was prepared by following the general procedure <b>2.2</b> from indazolone <b>1e</b> (29 mg, 0.1 mmol) and alkyne <b>2j</b> (11 mg, 0.1 mmol) which was then purified by column chromatography using 15% EtOAc in hexane to afford yellow gummy liquid of <b>3ej</b> (24 mg, 59%). UV-vis (CHCl<sub>3</sub>) λ<sub>max</sub> 304 nm, ε<sub>max</sub> 2200. FTIR (CHCl<sub>3</sub>, cm<sup>-1</sup>) ν<sub>max</sub> 1719, 1659, 1603, 1500, 1468. <sup>1</sup>H NMR (500 MHz, CDCl<sub>3</sub>) δ 7.98 (d, <i>J</i> = 1.9 Hz, 1H), 7.66 (dd, <i>J</i> = 8.7, 1.9 Hz, 1H), 7.40-7.38 (m, 1H), 7.35 (d, <i>J</i> = 7.7 Hz, 1H), 7.23 (d, <i>J</i> = 7.9 Hz, 1H), 7.18 (d, <i>J</i> = 7.6 Hz, 1H), 7.05 (t, <i>J</i> = 7.5 Hz, 1H), 4.05 (d, <i>J</i> = 17.5 Hz, 1H), 3.22 (d, <i>J</i> = 17.5 Hz, 1H), 2.53-2.47 (m, 1H), 2.42–2.23 (m, 2H), 1.98–1.94 (m, 1H), 1.30-1.18 (m, 1H), 1.10-0.86 (m, 1H), 0.83 (t, <i>J</i> = 7.3 Hz, 6H). <sup>13</sup>C NMR (125 MHz, CDCl<sub>3</sub>) δ 206.8, 157.8, 136.8, 136.4, 134.8, 134.7, 129.0, 127.0, 122.9, 122.0, 120.9, 113.5, 111.2, 108.0, 67.6, 46.8, 41.0, 36.4, 16.8, 13.6, 7.2. HRMS (+ESI) Calcd for C<sub>21</sub>H<sub>22</sub>BrN<sub>2</sub>O<sub>2</sub> [M+H]<sup>+</sup>: 413.0864; found: 413.0863.</p> |
|  <p style="text-align: center;"><b>4fj</b></p> | <p><b>2-methyl-12-(2-oxobutyl)-12-propyl-10H,12H-indazolo[1,2-a]indazol-10-one (4fj):</b> The title compound was prepared by following the general procedure <b>2.2</b> from indazolone <b>1f</b> (22 mg, 0.1 mmol) and alkyne <b>2j</b> (11 mg, 0.1 mmol) which was then purified by column chromatography using 15% EtOAc in hexane to afford yellow gummy liquid of <b>4fj</b> (22 mg, 64%). UV-vis (CHCl<sub>3</sub>) λ<sub>max</sub> 300 nm, ε<sub>max</sub> 9650. FTIR (CHCl<sub>3</sub>, cm<sup>-1</sup>) ν<sub>max</sub> 1719, 1656, 1502. <sup>1</sup>H NMR (500 MHz, CDCl<sub>3</sub>) δ 7.86 (d, <i>J</i> = 7.9 Hz, 1H), 7.58 (t, <i>J</i> = 7.7 Hz, 1H), 7.50 (d, <i>J</i> = 8.3 Hz, 1H), 7.14 (t, <i>J</i> = 7.5 Hz, 1H), 7.10–7.05 (m, 2H), 6.85 (d, <i>J</i> = 7.7 Hz, 1H), 4.00 (d, <i>J</i> = 17.3 Hz, 1H), 3.23 (d, <i>J</i> = 17.2 Hz, 1H), 2.57-2.51 (m, 1H),</p>                                                                                                                                                                                                                                                                                                                                                                                                                                                                                          |

|                                                                                                       |                                                                                                                                                                                                                                                                                                                                                                                                                                                                                                                                                                                                                                                                                                                                                                                                                                                                                                                                                                                                                                                                                                                                                                                                                                                                                                                                                                                                                                                 |
|-------------------------------------------------------------------------------------------------------|-------------------------------------------------------------------------------------------------------------------------------------------------------------------------------------------------------------------------------------------------------------------------------------------------------------------------------------------------------------------------------------------------------------------------------------------------------------------------------------------------------------------------------------------------------------------------------------------------------------------------------------------------------------------------------------------------------------------------------------------------------------------------------------------------------------------------------------------------------------------------------------------------------------------------------------------------------------------------------------------------------------------------------------------------------------------------------------------------------------------------------------------------------------------------------------------------------------------------------------------------------------------------------------------------------------------------------------------------------------------------------------------------------------------------------------------------|
|                                                                                                       | <p>2.37 (s, 3H), 2.37-2.26 (m, 2H), 2.00-1.93 (m, 1H), 1.31-1.14 (m, 1H), 1.06-1.00 (m, 1H), 0.84-0.80 (m, 6H). <sup>13</sup>C NMR (125 MHz, CDCl<sub>3</sub>) δ 206.9, 158.9, 139.2, 138.0, 136.7, 131.8, 131.7, 124.2, 123.3, 121.9, 120.8, 119.4, 109.7, 108.7, 67.4, 47.2, 40.8, 36.4, 21.6, 16.8, 13.6, 7.2. HRMS (+ESI) Calcd for C<sub>22</sub>H<sub>25</sub>N<sub>2</sub>O<sub>2</sub> [M+H]<sup>+</sup>: 349.1916; found: 349.1918.</p>                                                                                                                                                                                                                                                                                                                                                                                                                                                                                                                                                                                                                                                                                                                                                                                                                                                                                                                                                                                                |
| 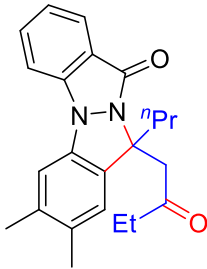 <p><b>4gj</b></p>  | <p><b>2,3-dimethyl-12-(2-oxobutyl)-12-propyl-10H,12H-indazolo[1,2-a]indazol-10-one (4gj):</b> The title compound was prepared by following the general procedure <b>2.2</b> from indazolone <b>1g</b> (24 mg, 0.1 mmol) and alkyne <b>2j</b> (11 mg, 0.1 mmol) which was then purified by column chromatography using 15% EtOAc in hexane to afford gummy liquid of <b>4gj</b> (18 mg, 51%). UV-vis (CHCl<sub>3</sub>) λ<sub>max</sub> 300 nm, ε<sub>max</sub> 3700. FTIR (CHCl<sub>3</sub>, cm<sup>-1</sup>) ν<sub>max</sub> 1719, 1654, 1610, 1500. <sup>1</sup>H NMR (500 MHz, CDCl<sub>3</sub>) δ 7.85 (dd, <i>J</i> = 7.8, 0.8 Hz, 1H), 7.59-7.56 (m, 1H), 7.49 (d, <i>J</i> = 8.3 Hz, 1H), 7.15-7.10 (m, 1H), 7.06 (s, 1H), 6.94 (s, 1H), 3.99 (d, <i>J</i> = 17.2 Hz, 1H), 3.22 (d, <i>J</i> = 17.2 Hz, 1H), 2.57-2.50 (m, 1H), 2.40-2.30 (m, 2H), 2.32 (s, 3H), 2.25 (s, 3H), 1.97-1.91 (m, 1H), 1.25-1.15 (m, 1H), 1.15-0.94 (m, 1H), 0.85-0.80 (m, 6H). <sup>13</sup>C NMR (125 MHz, CDCl<sub>3</sub>) δ 207.0, 158.9, 138.0, 137.4, 134.8, 132.0, 131.6, 130.8, 124.2, 123.1, 120.5, 119.1, 109.6, 109.2, 67.4, 47.3, 40.8, 36.4, 20.2, 19.7, 16.8, 13.6, 7.2. HRMS (+ESI) Calcd for C<sub>23</sub>H<sub>27</sub>N<sub>2</sub>O<sub>2</sub> [M+H]<sup>+</sup>: 363.2072; found: 363.2073. Anal. Calcd for C<sub>23</sub>H<sub>26</sub>N<sub>2</sub>O<sub>2</sub>: C, 76.21; H, 7.23; N, 7.73. Found: C, 76.04; H, 7.29; N, 7.62.</p> |
|  <p><b>4ij</b></p> | <p><b>2-chloro-12-(2-oxobutyl)-12-propyl-10H,12H-indazolo[1,2-a]indazol-10-one (4ij):</b> The title compound was prepared by following the general procedure <b>2.2</b> from indazolone <b>1i</b> (24 mg, 0.1 mmol) and alkyne <b>2j</b> (11 mg, 0.1 mmol) which was then purified by column chromatography using 15% EtOAc in hexane to afford light yellow solid of <b>4ij</b> (18 mg, 50%). UV-vis (CHCl<sub>3</sub>) λ<sub>max</sub> 300 nm, ε<sub>max</sub> 3450. FTIR (CHCl<sub>3</sub>, cm<sup>-1</sup>) ν<sub>max</sub> 1720, 1653, 1500. M.p.: 172–174 °C. <sup>1</sup>H NMR (500 MHz, CDCl<sub>3</sub>) δ 7.85 (d, <i>J</i></p>                                                                                                                                                                                                                                                                                                                                                                                                                                                                                                                                                                                                                                                                                                                                                                                                       |

|                                                                                                      |                                                                                                                                                                                                                                                                                                                                                                                                                                                                                                                                                                                                                                                                                                                                                                                                                                                                                                                                                                                                                                                                                                                                                                                                                                                                                                                                                                                                                                                                                                                                                                                                                                                                                                                                                                                                                                                                                  |
|------------------------------------------------------------------------------------------------------|----------------------------------------------------------------------------------------------------------------------------------------------------------------------------------------------------------------------------------------------------------------------------------------------------------------------------------------------------------------------------------------------------------------------------------------------------------------------------------------------------------------------------------------------------------------------------------------------------------------------------------------------------------------------------------------------------------------------------------------------------------------------------------------------------------------------------------------------------------------------------------------------------------------------------------------------------------------------------------------------------------------------------------------------------------------------------------------------------------------------------------------------------------------------------------------------------------------------------------------------------------------------------------------------------------------------------------------------------------------------------------------------------------------------------------------------------------------------------------------------------------------------------------------------------------------------------------------------------------------------------------------------------------------------------------------------------------------------------------------------------------------------------------------------------------------------------------------------------------------------------------|
|                                                                                                      | <p>= 7.7 Hz, 1H), 7.60 (t, <math>J = 7.3</math> Hz, 1H), 7.45 (d, <math>J = 8.2</math> Hz, 1H), 7.32 (d, <math>J = 8.1</math> Hz, 1H), 7.25-7.13 (m, 3H), 4.09 (d, <math>J = 17.7</math> Hz, 1H), 3.20 (d, <math>J = 17.9</math> Hz, 1H), 2.49-2.33 (m, 3H), 1.92 (t, <math>J = 12.7</math> Hz, 1H), 1.30-1.10 (m, 1H), 1.10-1.00 (m, 1H), 0.89-0.83 (m, 6H). <math>^{13}\text{C}</math> NMR (125 MHz, <math>\text{CDCl}_3</math>) <math>\delta</math> 206.6, 159.3, 138.5, 136.9, 135.6, 132.0, 128.9, 127.6, 124.4, 122.4, 121.4, 119.5, 109.7, 108.6, 67.3, 46.9, 41.1, 36.2, 16.8, 13.6, 7.2. HRMS (+ESI) Calcd for <math>\text{C}_{21}\text{H}_{22}\text{ClN}_2\text{O}_2</math> <math>[\text{M}+\text{H}]^+</math>: 369.1369; found: 369.1367. Anal. Calcd for <math>\text{C}_{21}\text{H}_{21}\text{ClN}_2\text{O}_2</math>: C, 68.38; H, 5.74; N, 7.59. Found: C, 68.65; H, 5.40; N, 7.78.</p>                                                                                                                                                                                                                                                                                                                                                                                                                                                                                                                                                                                                                                                                                                                                                                                                                                                                                                                                                                           |
| 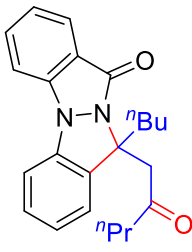 <p><b>4ak</b></p> | <p><b>12-butyl-12-(2-oxopentyl)-10H,12H-indazolo[1,2-a]indazol-10-one (4ak):</b> The title compound was prepared by following the general procedure <b>2.2</b> from indazolone <b>1a</b> (21 mg, 0.1 mmol) and alkyne <b>2k</b> (14 mg, 0.1 mmol) which was then purified by column chromatography using 15% EtOAc in hexane to afford light brown solid of <b>4ak</b> (25 mg, 63%). UV-vis (<math>\text{CHCl}_3</math>) <math>\lambda_{\text{max}}</math> 300 nm, <math>\epsilon_{\text{max}}</math> 3300. FTIR (<math>\text{CHCl}_3</math>, <math>\text{cm}^{-1}</math>) <math>\nu_{\text{max}}</math> 1718, 1656, 1605, 1500. <math>^1\text{H}</math> NMR (500 MHz, <math>\text{CDCl}_3</math>) <math>\delta</math> 7.87 (d, <math>J = 7.9</math> Hz, 1H), 7.59 (t, <math>J = 7.2</math> Hz, 1H), 7.50 (d, <math>J = 9.3</math> Hz, 1H), 7.36 (t, <math>J = 7.6</math> Hz, 1H), 7.26 (d, <math>J = 6.3</math> Hz, 1H), 7.19 (d, <math>J = 8.1</math> Hz, 1H), 7.16 (t, <math>J = 7.1</math> Hz, 1H), 7.05 (t, <math>J = 7.5</math> Hz, 1H), 4.04 (d, <math>J = 17.4</math> Hz, 1H), 3.23 (d, <math>J = 17.4</math> Hz, 1H), 2.60-2.50 (m, 1H), 2.31-2.20 (m, 2H), 2.06-1.95 (m, 1H), 1.42-1.32 (m, 2H), 1.28-1.17 (m, 2H), 1.02-0.90 (m, 2H), 0.77 (t, <math>J = 6.9</math> Hz, 3H), 0.71 (t, <math>J = 7.4</math> Hz, 3H). <math>^{13}\text{C}</math> NMR (125 MHz, <math>\text{CDCl}_3</math>) <math>\delta</math> 206.5, 159.0, 138.3, 136.8, 134.7, 131.8, 128.9, 124.3, 122.5, 122.1, 120.1, 119.5, 109.8, 107.9, 67.4, 47.5, 45.2, 38.6, 25.5, 22.3, 16.6, 13.8, 13.3. HRMS (+ESI) Calcd for <math>\text{C}_{23}\text{H}_{27}\text{N}_2\text{O}_2</math> <math>[\text{M}+\text{H}]^+</math>: 363.2072; found: 363.2075. Anal. Calcd for <math>\text{C}_{23}\text{H}_{26}\text{N}_2\text{O}_2</math>: C, 76.21; H, 7.23; N, 7.73. Found: C, 75.89; H, 7.01; N, 7.74.</p> |

|                                                                                                                                    |                                                                                                                                                                                                                                                                                                                                                                                                                                                                                                                                                                                                                                                                                                                                                                                                                                                                                                                                                                                                                                                                                                                                                                                                                                                                                                                                                                                                                                                                                                                                           |
|------------------------------------------------------------------------------------------------------------------------------------|-------------------------------------------------------------------------------------------------------------------------------------------------------------------------------------------------------------------------------------------------------------------------------------------------------------------------------------------------------------------------------------------------------------------------------------------------------------------------------------------------------------------------------------------------------------------------------------------------------------------------------------------------------------------------------------------------------------------------------------------------------------------------------------------------------------------------------------------------------------------------------------------------------------------------------------------------------------------------------------------------------------------------------------------------------------------------------------------------------------------------------------------------------------------------------------------------------------------------------------------------------------------------------------------------------------------------------------------------------------------------------------------------------------------------------------------------------------------------------------------------------------------------------------------|
| 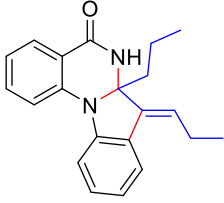 <p style="text-align: center;"><b>4aj'</b></p>   | <p><b>(E)-6a-propyl-7-propylidene-6a,7-dihydroindolo[1,2-a]quinazolin-5(6H)-one (4aj')</b>: The title compound was prepared by following the general procedure <b>2.5</b> from indazolone <b>1a</b> (21 mg, 0.1 mmol) and alkyne <b>2j'</b> (11 mg, 0.1 mmol) which was then purified by column chromatography using 15% EtOAc in hexane to afford a yellow thick gum of <b>4aj'</b> (10 mg, 33%). UV-vis (CHCl<sub>3</sub>) <math>\lambda_{\max}</math> 296 nm, <math>\epsilon_{\max}</math> 3850. FTIR (CHCl<sub>3</sub>, cm<sup>-1</sup>) <math>\nu_{\max}</math> 1663, 1596, 1491. <sup>1</sup>H NMR (500 MHz, CDCl<sub>3</sub>) <math>\delta</math> 8.09 (dd, <i>J</i> = 7.8, 1.5 Hz, 1H), 7.64-7.59 (m, 1H), 7.58 (d, <i>J</i> = 7.7 Hz, 1H), 7.48 (d, <i>J</i> = 8.0 Hz, 1H), 7.22 (t, <i>J</i> = 7.7 Hz, 1H), 7.20-7.14 (m, 2H), 6.95-6.89 (m, 1H), 6.31 (s, 1H), 5.70 (t, <i>J</i> = 7.1 Hz, 1H), 2.61 (pentate, <i>J</i> = 7.4 Hz, 2H), 2.17-2.02 (m, 1H), 1.77-1.72 (m, 1H), 1.23 (t, <i>J</i> = 7.5 Hz, 3H), 1.19-1.09 (m, 2H), 0.75 (t, <i>J</i> = 7.4 Hz, 3H). <sup>13</sup>C NMR (125 MHz, CDCl<sub>3</sub>) <math>\delta</math> 162.2, 148.4, 139.9, 138.0, 133.4, 129.4, 128.9, 126.3, 126.0, 125.3, 123.4, 122.3, 122.1, 120.7, 107.6, 80.2, 42.1, 22.0, 17.6, 14.0, 13.8. HRMS (+ESI) Calcd for C<sub>21</sub>H<sub>23</sub>N<sub>2</sub>O [M+H]<sup>+</sup>:319.1810; found: 319.1812. Anal. Calcd for C<sub>21</sub>H<sub>22</sub>N<sub>2</sub>O: C, 79.21; H, 6.96; N, 8.80. Found: C, 79.30; H, 7.31; N, 8.69.</p> |
|  <p style="text-align: center;"><b>4ak'</b></p> | <p><b>(E)-6a-butyl-7-butylidene-6a,7-dihydroindolo[1,2-a]quinazolin-5(6H)-one and (Z)-6a-butyl-7-butylidene-6a,7-dihydroindolo[1,2-a]quinazolin-5(6H)-one (4ak', E:Z = 24:1)</b>: The title compounds were prepared by following the general procedure <b>2.5</b> from indazolone <b>1a</b> (21 mg, 0.1 mmol) and alkyne <b>2k'</b> (14 mg, 0.1 mmol) which was then purified by column chromatography using 15% EtOAc in hexane to afford yellow solid of <b>4ak'</b> (12 mg, 36%). M.p.: 164–166 °C. UV-vis (CHCl<sub>3</sub>) <math>\lambda_{\max}</math> 295 nm, <math>\epsilon_{\max}</math> 3750. FTIR (CHCl<sub>3</sub>, cm<sup>-1</sup>) <math>\nu_{\max}</math> 1663, 1594, 1491, 1461. <sup>1</sup>H NMR (500 MHz, CDCl<sub>3</sub>) <math>\delta</math> 8.25 (dd, <i>J</i> = 7.7, 1.9 Hz, 0.04H), 8.09 (dd, <i>J</i> = 7.8, 1.5 Hz, 0.96H), 7.68-7.62 (m, 0.08H), 7.64-7.56 (m, 1.92H), 7.48 (d, <i>J</i> = 8.0 Hz, 0.96H), 7.38 (d, <i>J</i> = 6.6 Hz, 0.04H), 7.33-7.29 (m, 0.08H) 7.22 (t, <i>J</i> = 7.7 Hz, 1H), 7.20-7.10 (m, 1.92H), 6.95-6.85 (m, 1H), 6.35 (bs, 1H), 6.17</p>                                                                                                                                                                                                                                                                                                                                                                                                                                         |

|                                                                                                       |                                                                                                                                                                                                                                                                                                                                                                                                                                                                                                                                                                                                                                                                                                                                                                                                                                                                                                                                                                                                                                                                                                                                                                                                                                                                                                                                                                                                                                                                                                                                                           |
|-------------------------------------------------------------------------------------------------------|-----------------------------------------------------------------------------------------------------------------------------------------------------------------------------------------------------------------------------------------------------------------------------------------------------------------------------------------------------------------------------------------------------------------------------------------------------------------------------------------------------------------------------------------------------------------------------------------------------------------------------------------------------------------------------------------------------------------------------------------------------------------------------------------------------------------------------------------------------------------------------------------------------------------------------------------------------------------------------------------------------------------------------------------------------------------------------------------------------------------------------------------------------------------------------------------------------------------------------------------------------------------------------------------------------------------------------------------------------------------------------------------------------------------------------------------------------------------------------------------------------------------------------------------------------------|
|                                                                                                       | <p>(t, <math>J = 8.1</math> Hz, 0.04H), 5.77-5.66 (m, 0.96H), 2.76 (q, <math>J = 6.8</math> Hz, 0.08H), 2.57 (q, <math>J = 7.4</math> Hz, 1.92H), 2.18-2.05 (m, 1H), 1.82-1.60 (m, 4H), 1.45-1.37 (m, 0.12H), 1.28-1.22 (m, 0.12H), 1.19-1.01 (m, 5.76H), 0.96 (t, <math>J = 7.4</math> Hz, 0.12H), 0.73 (t, <math>J = 7.0</math> Hz, 2.88H). <math>^{13}\text{C}</math> NMR (125 MHz, <math>\text{CDCl}_3</math>) <math>\delta</math> 162.1, 148.3, 139.8, 138.2, 133.2, 130.4, 129.3, 128.8, 126.0, 125.1, 124.6, 123.3, 122.2, 120.5, 107.5, 80.3, 39.4, 30.4, 26.3, 22.6, 22.2, 14.0, 13.8. HRMS (+ESI) Calcd for <math>\text{C}_{23}\text{H}_{27}\text{N}_2\text{O}</math> <math>[\text{M}+\text{H}]^+</math>: 347.2123; found: 347.2126. Anal. Calcd for <math>\text{C}_{23}\text{H}_{26}\text{N}_2\text{O}</math>: C, 79.73; H, 7.56; N, 8.09. Found: C, 79.79; H, 7.30; N, 7.68.</p>                                                                                                                                                                                                                                                                                                                                                                                                                                                                                                                                                                                                                                                              |
| 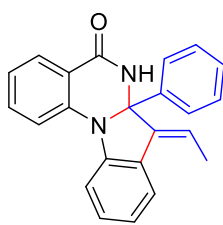 <p><b>4al'</b></p> | <p><b>(E)-7-ethylidene-6a-phenyl-6a,7-dihydroindolo[1,2-a]quinazolin-5(6H)-one (4al')</b>: The title compound was prepared by following the general procedure <b>2.5</b> from indazolone <b>1a</b> (21 mg, 0.1 mmol) and alkyne <b>21'</b> (13 mg, 0.1 mmol) which was then purified by column chromatography using 20% EtOAc in hexane to afford white solid of <b>4al'</b> (22 mg, 65%). M.p.: 209–211 °C. UV-vis (<math>\text{CHCl}_3</math>) <math>\lambda_{\text{max}}</math> 347 nm, <math>\epsilon_{\text{max}}</math> 3850. FTIR (<math>\text{CHCl}_3</math>, <math>\text{cm}^{-1}</math>) <math>\nu_{\text{max}}</math> 1666, 1591, 1491, 1463. <math>^1\text{H}</math> NMR (500 MHz, <math>\text{CDCl}_3</math>) <math>\delta</math> 7.99 (dd, <math>J = 7.8, 1.4</math> Hz, 1H), 7.63 (d, <math>J = 7.6</math> Hz, 1H), 7.51-7.44 (m, 4H), 7.28-7.17 (m, 5H), 7.14-7.10 (m, 1H), 7.02-6.98 (m, 1H), 6.61 (bs, 1H), 5.46 (q, <math>J = 7.3</math> Hz, 1H), 2.03 (d, <math>J = 7.4</math> Hz, 3H). <math>^{13}\text{C}</math> NMR (125 MHz, <math>\text{CDCl}_3</math>) <math>\delta</math> 162.9, 148.7, 142.8, 142.6, 140.2, 133.2, 129.4, 128.8, 128.1, 128.0, 127.9, 126.4, 126.3, 125.6, 125.2, 123.9, 122.8, 122.2, 121.1, 107.9, 82.1, 14.4. HRMS (+ESI) Calcd for <math>\text{C}_{23}\text{H}_{19}\text{N}_2\text{O}</math> <math>[\text{M}+\text{H}]^+</math>: 339.1497; found: 339.1501. Anal. Calcd for <math>\text{C}_{23}\text{H}_{18}\text{N}_2\text{O}</math>: C, 81.63; H, 5.36; N, 8.28. Found: C, 81.87; H, 5.04; N, 8.02.</p> |

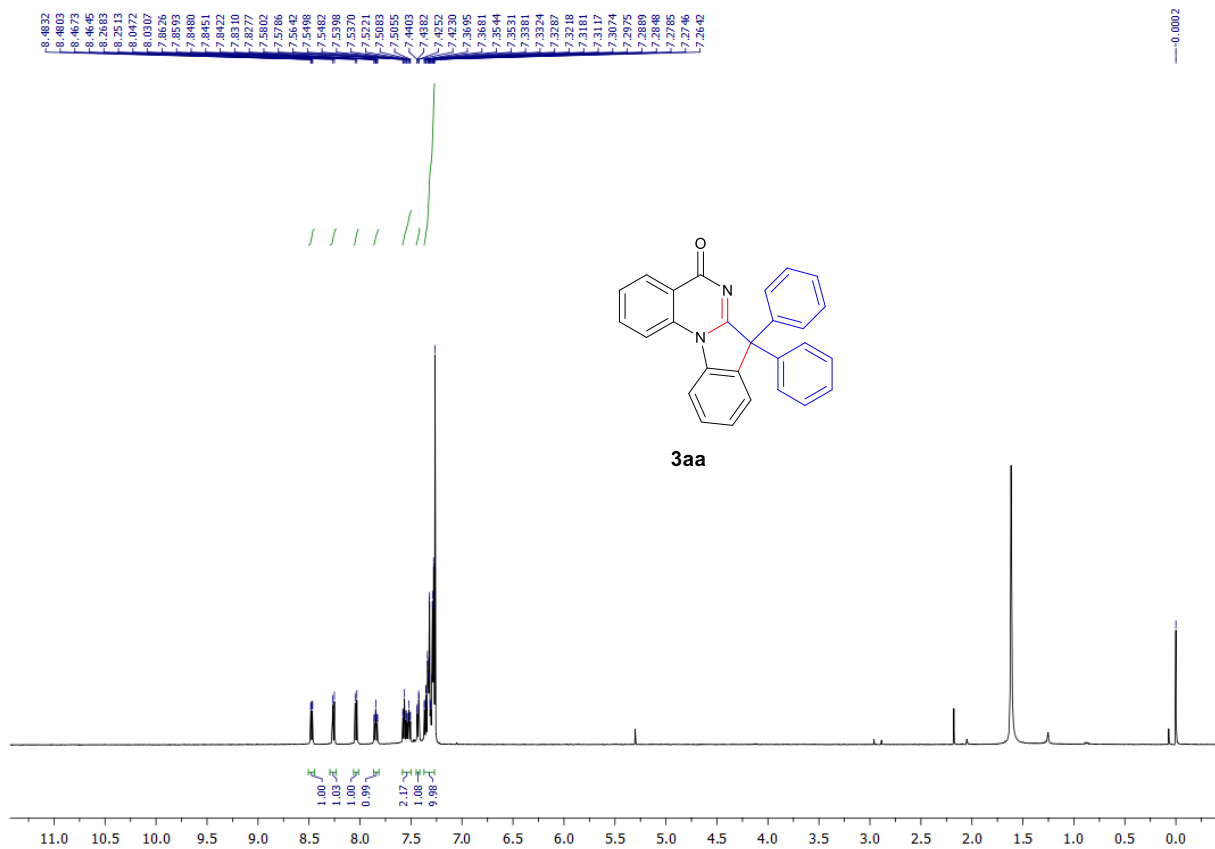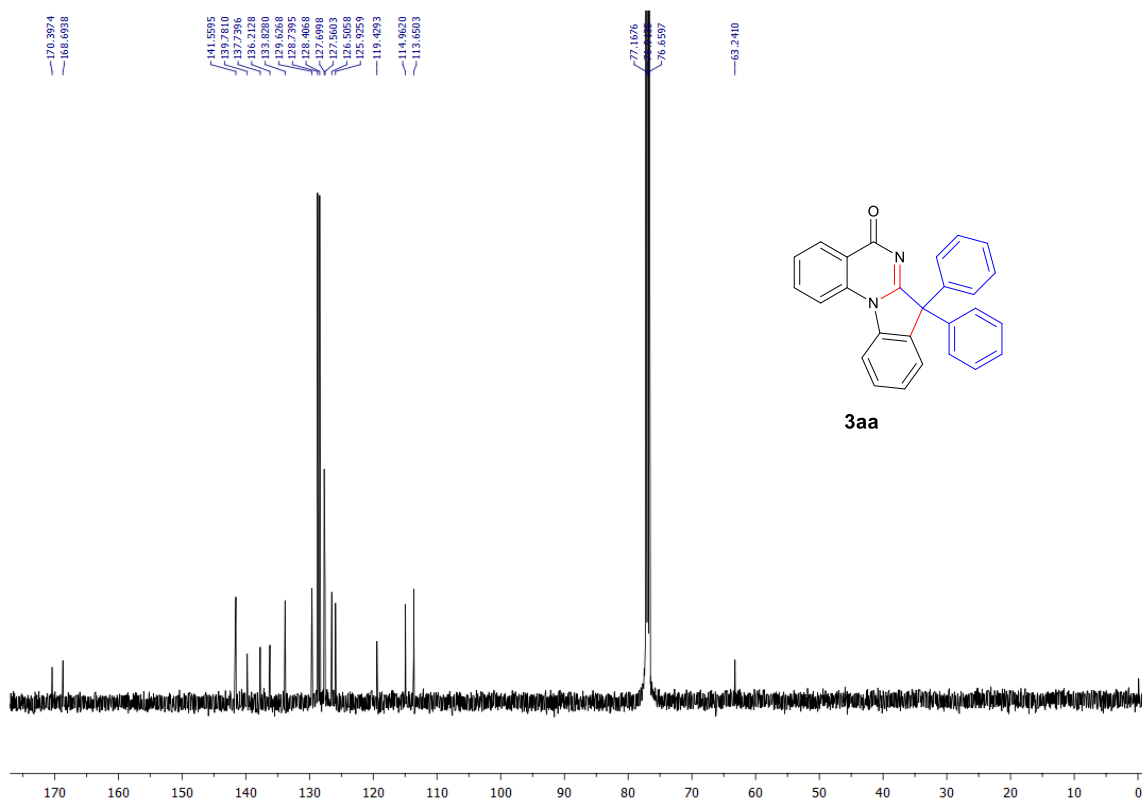

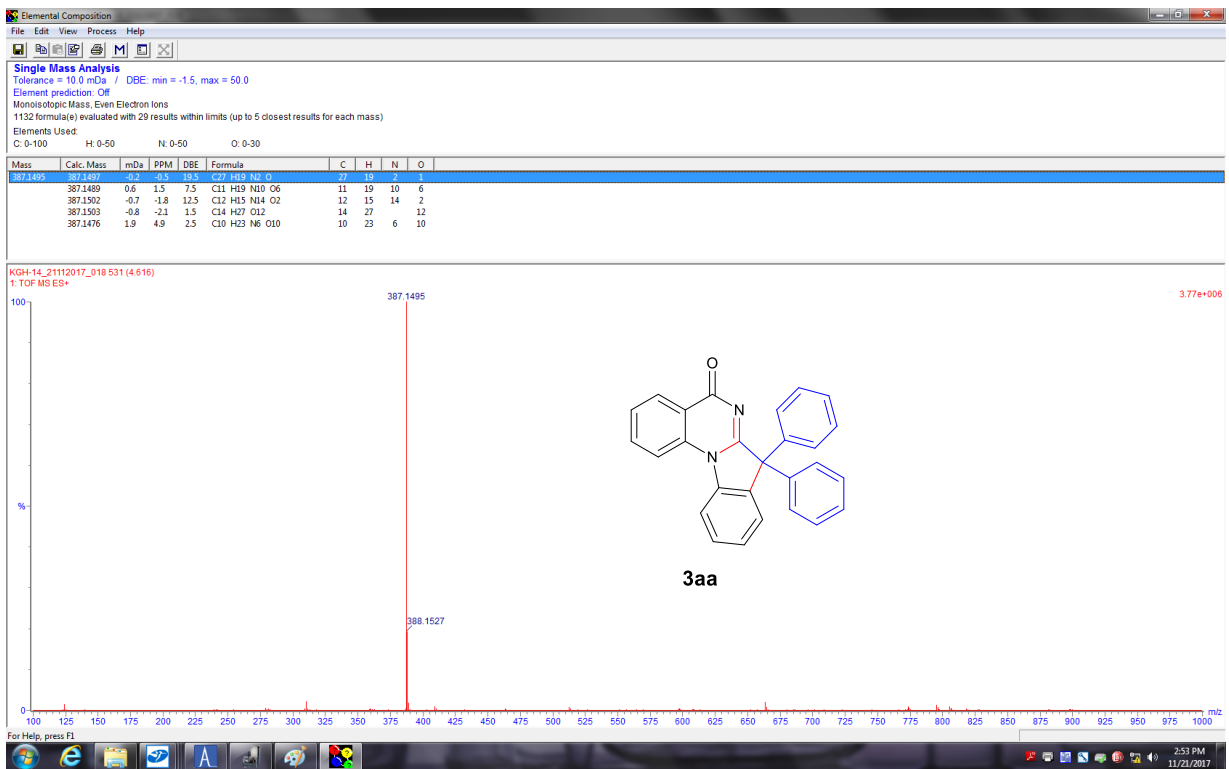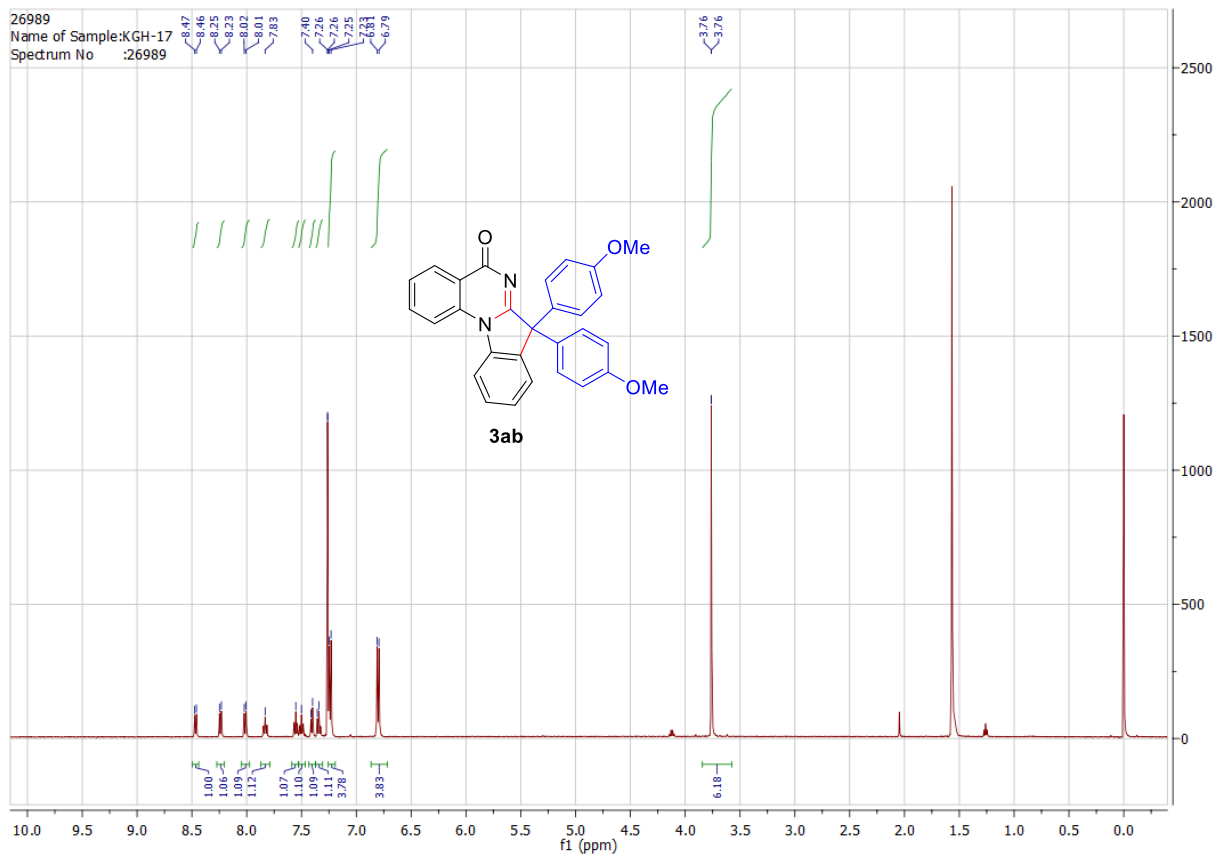

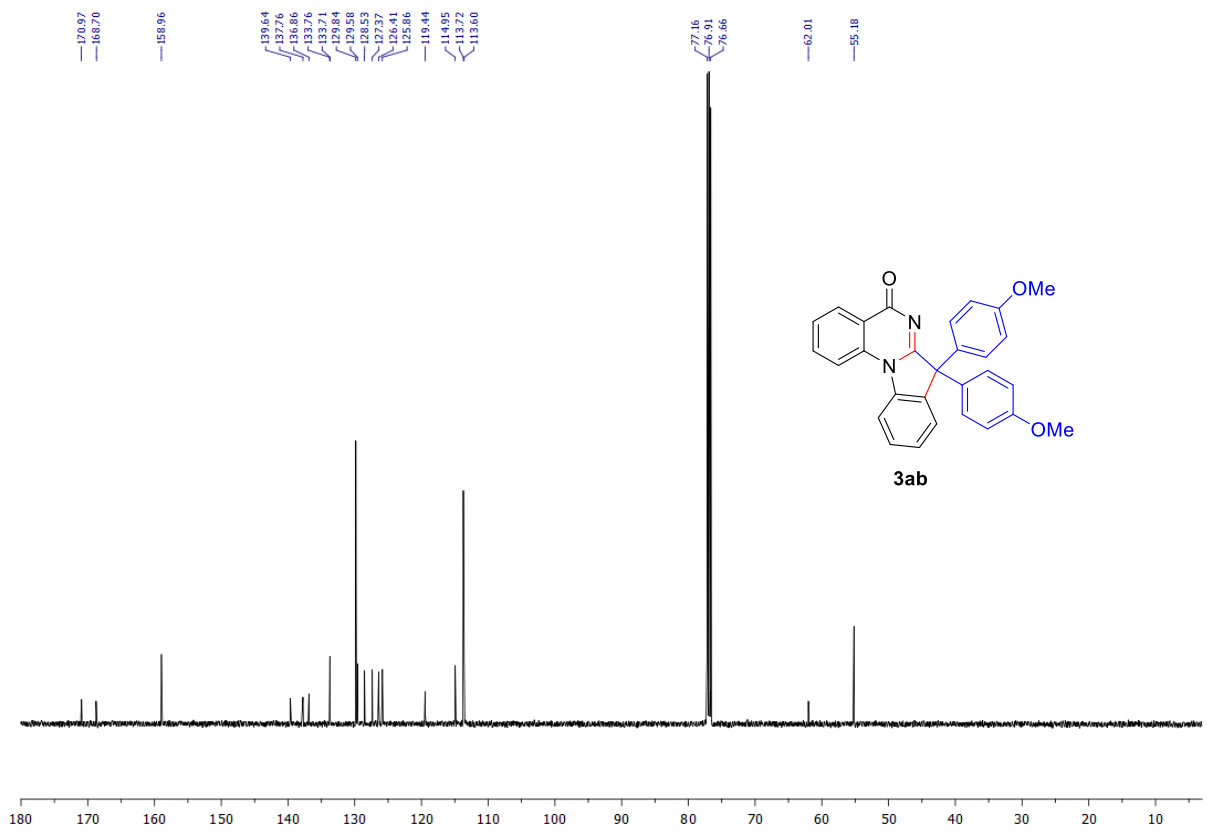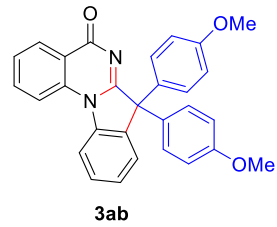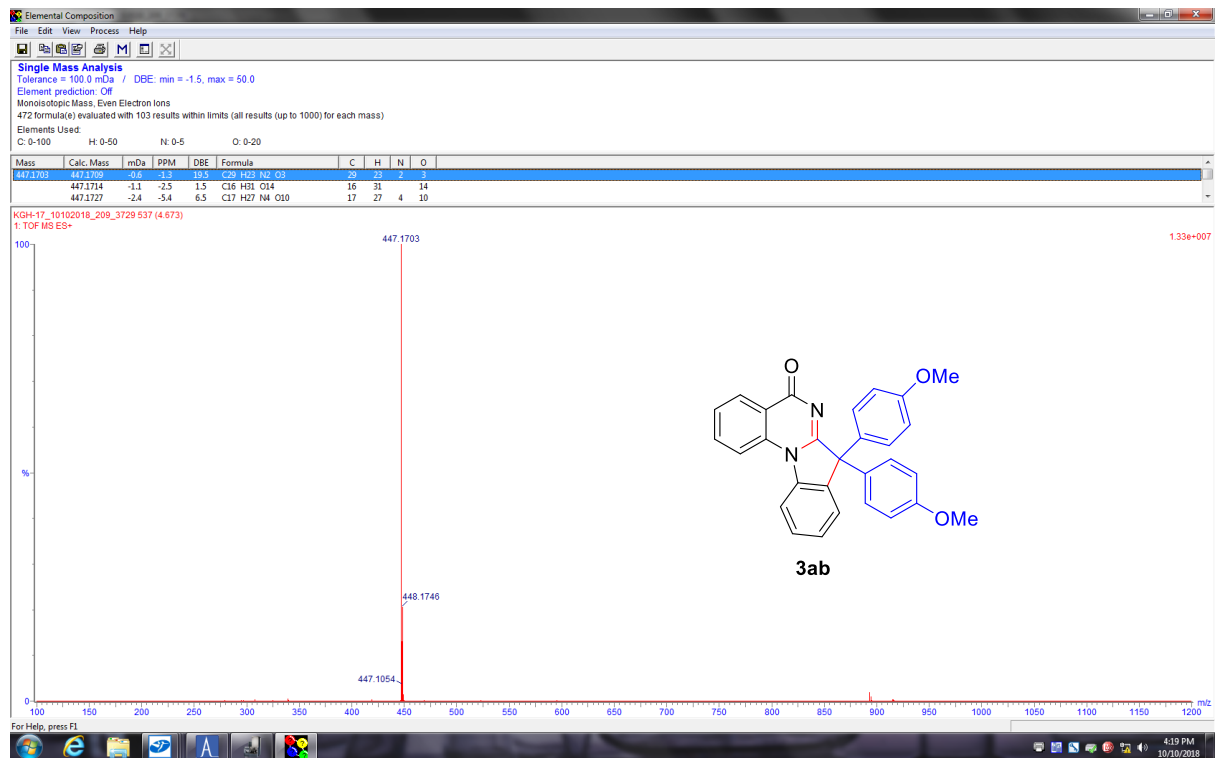



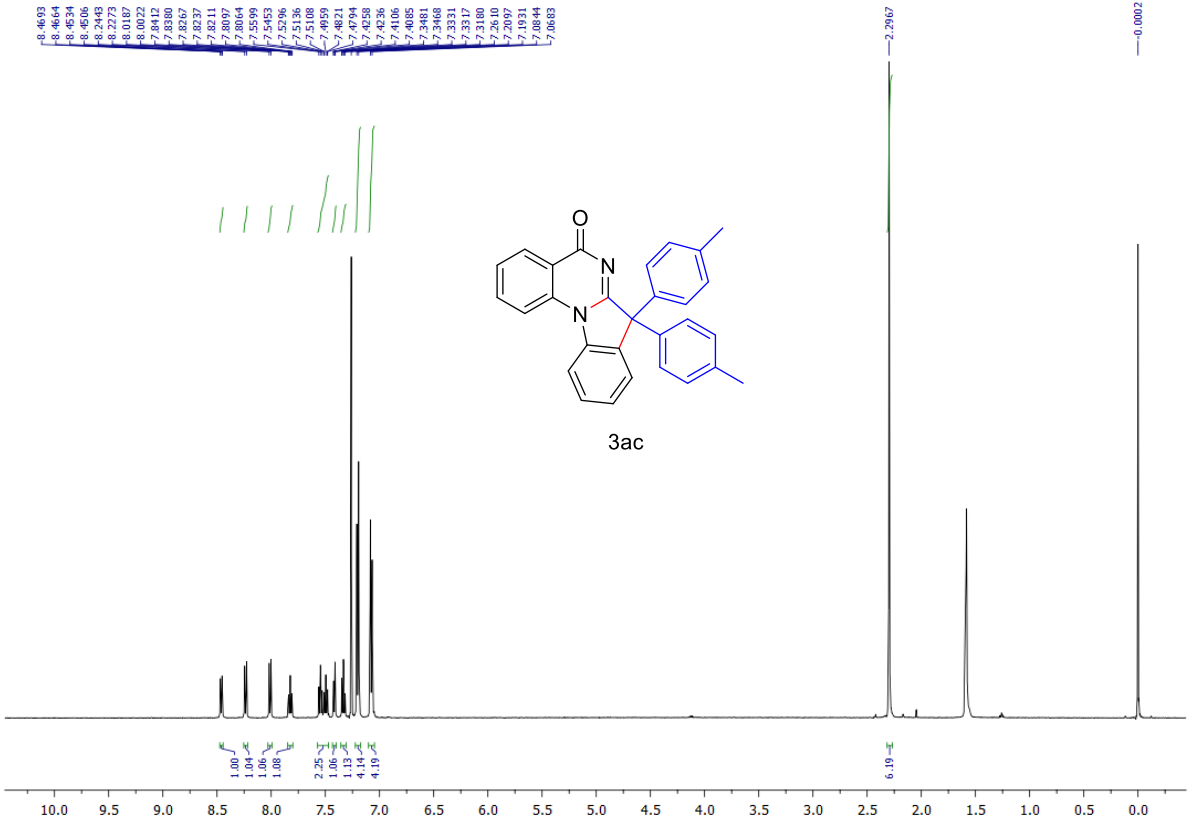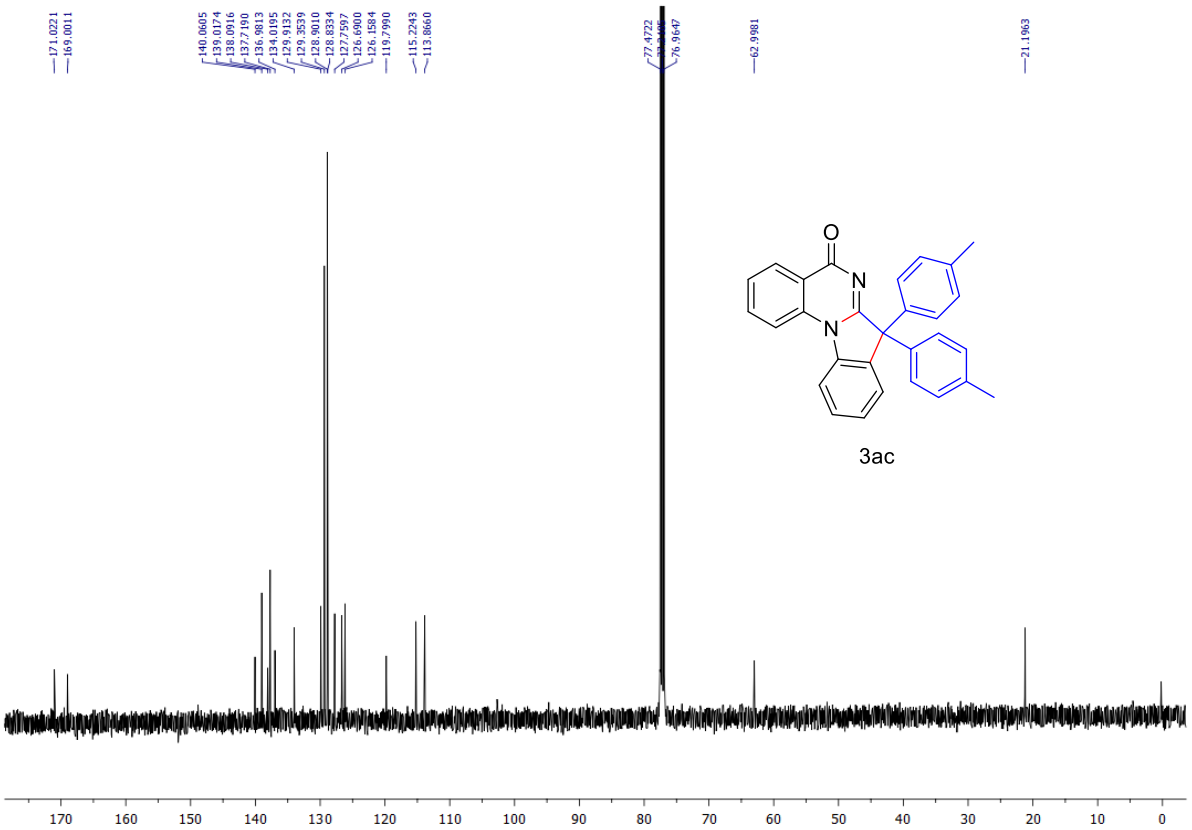

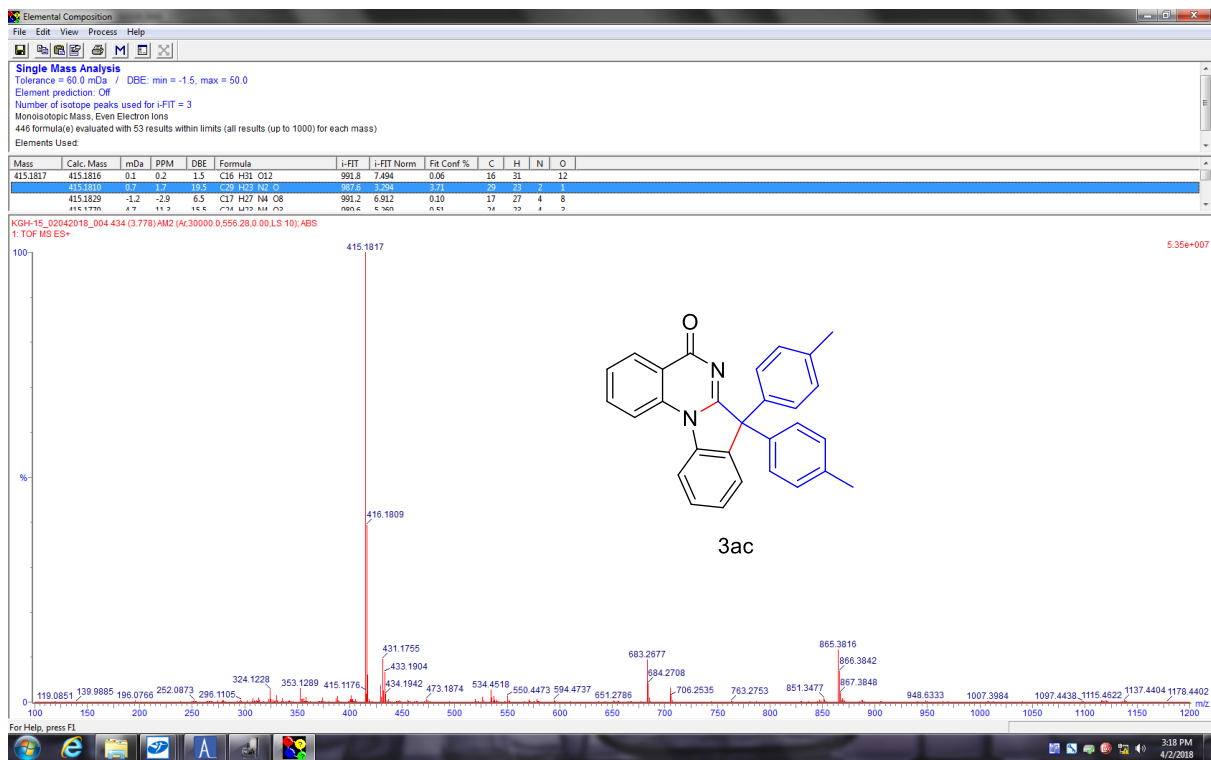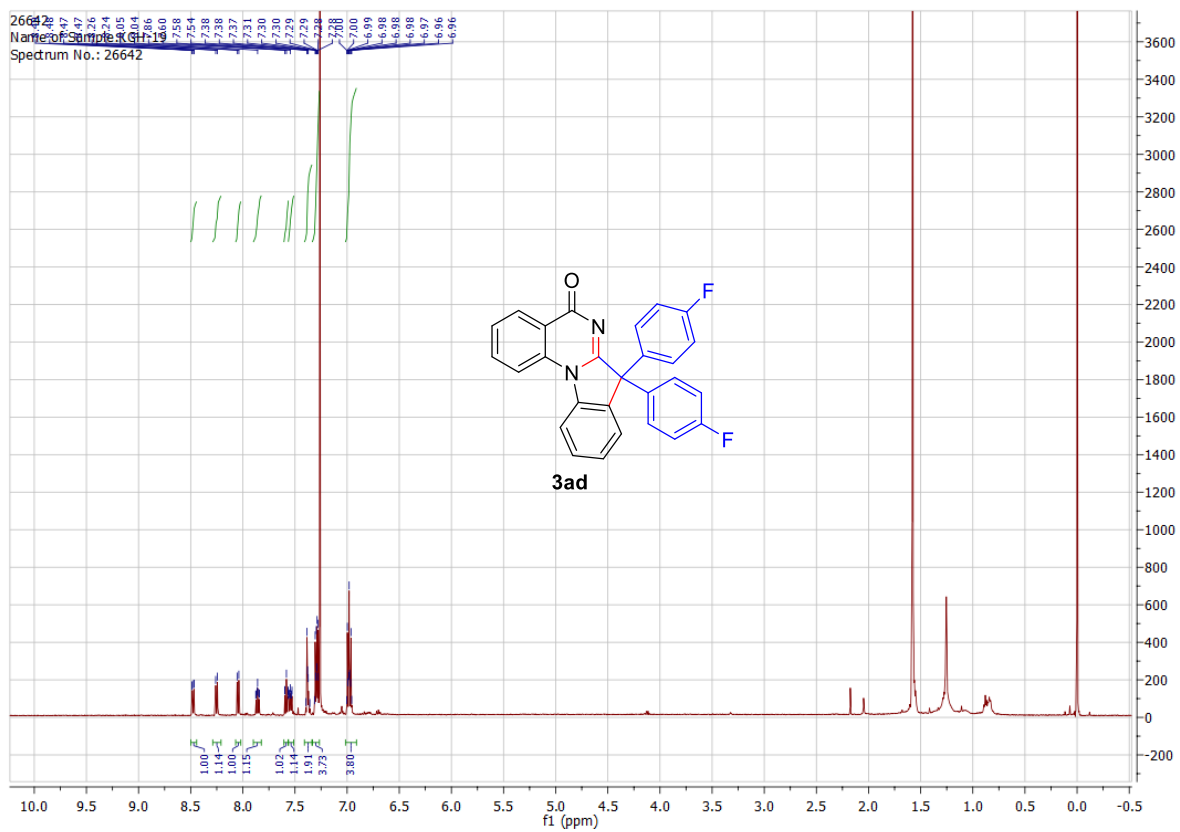

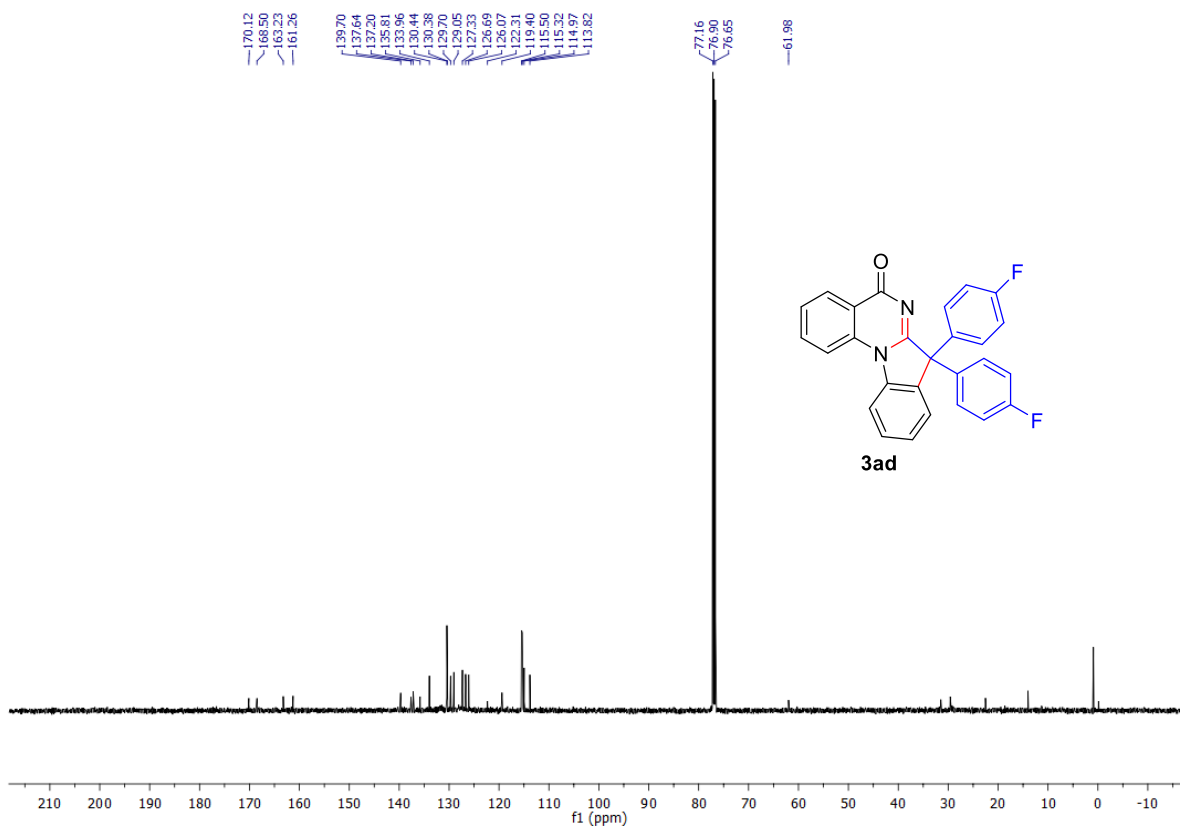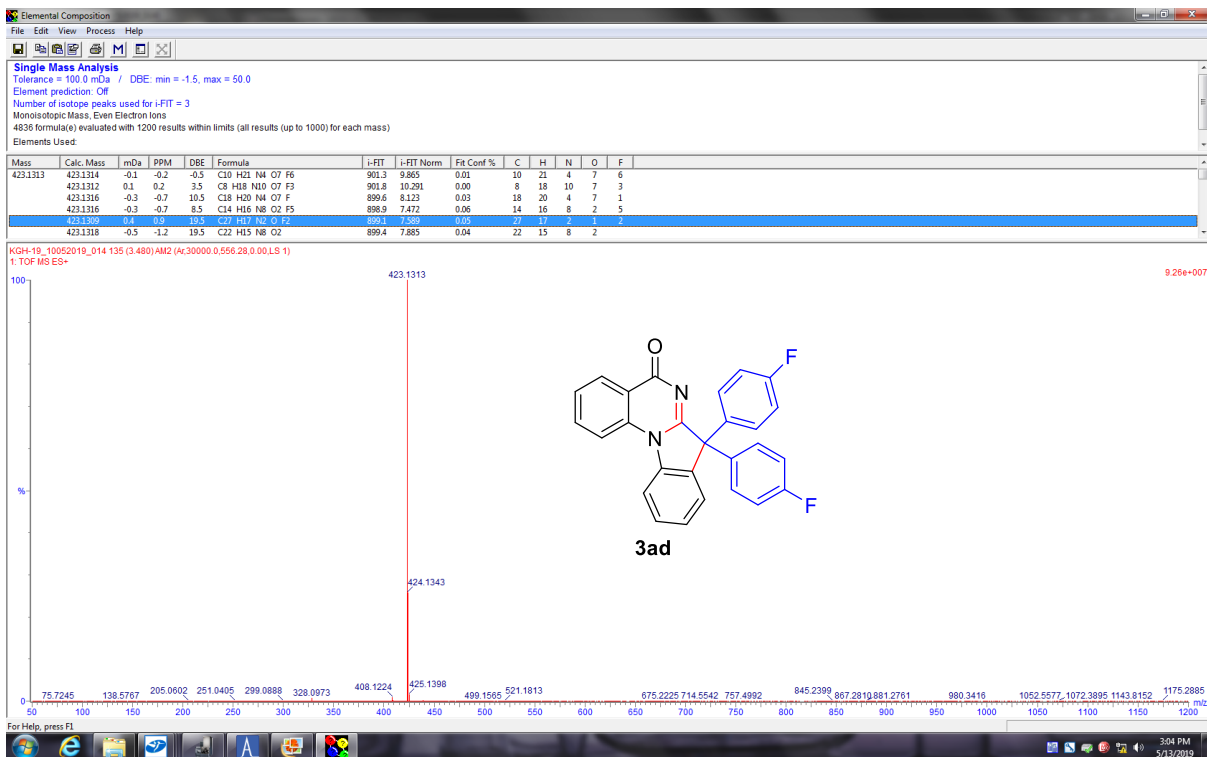

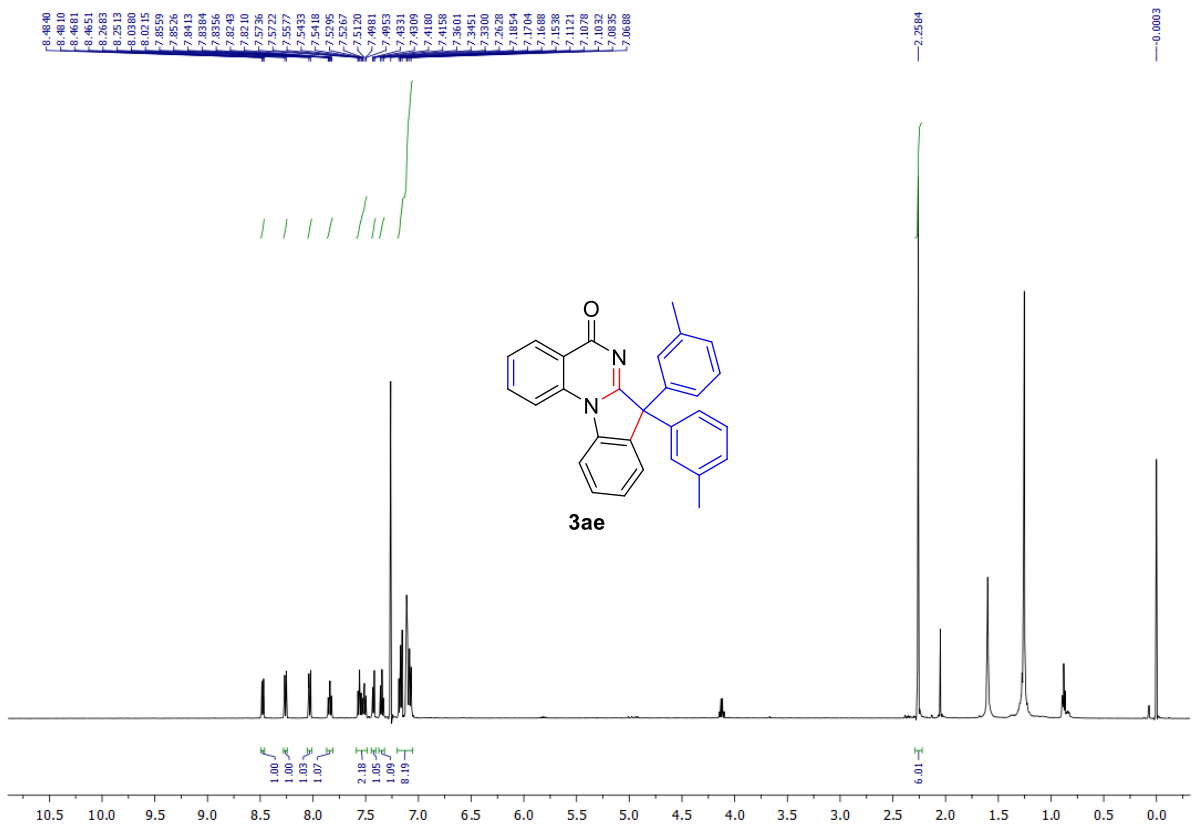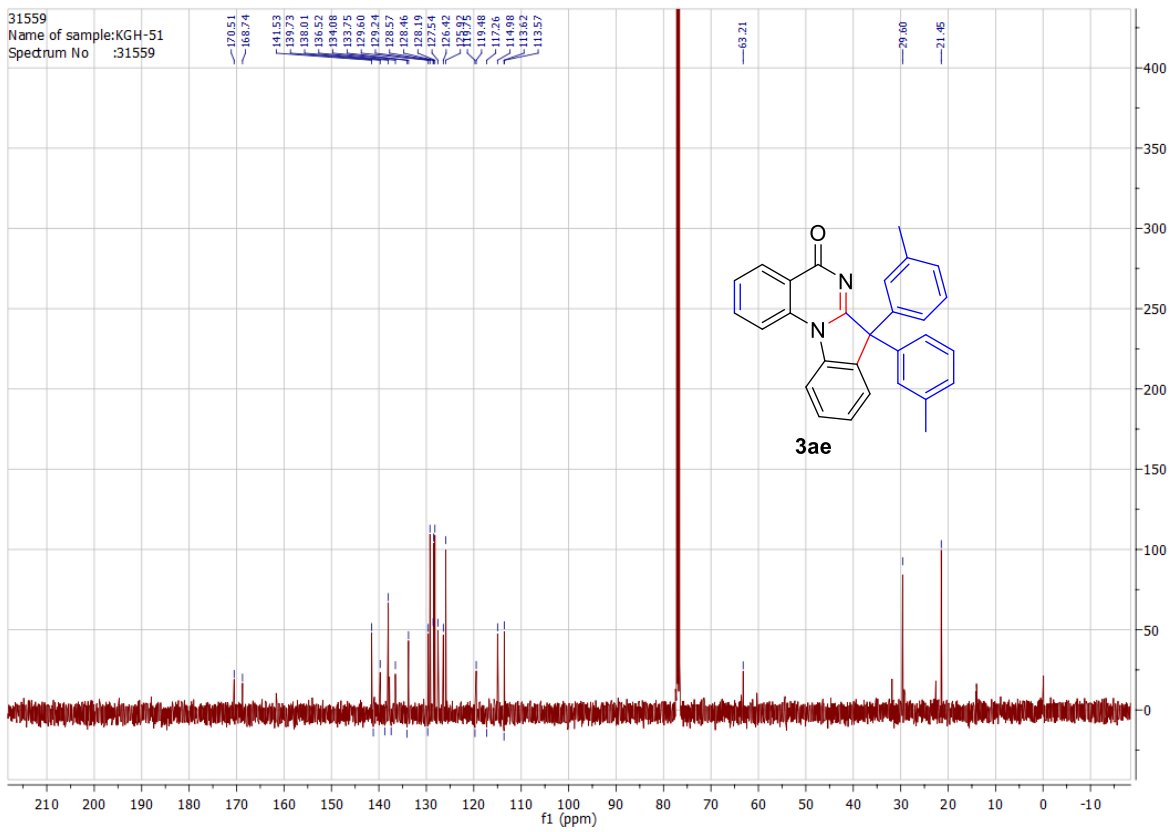

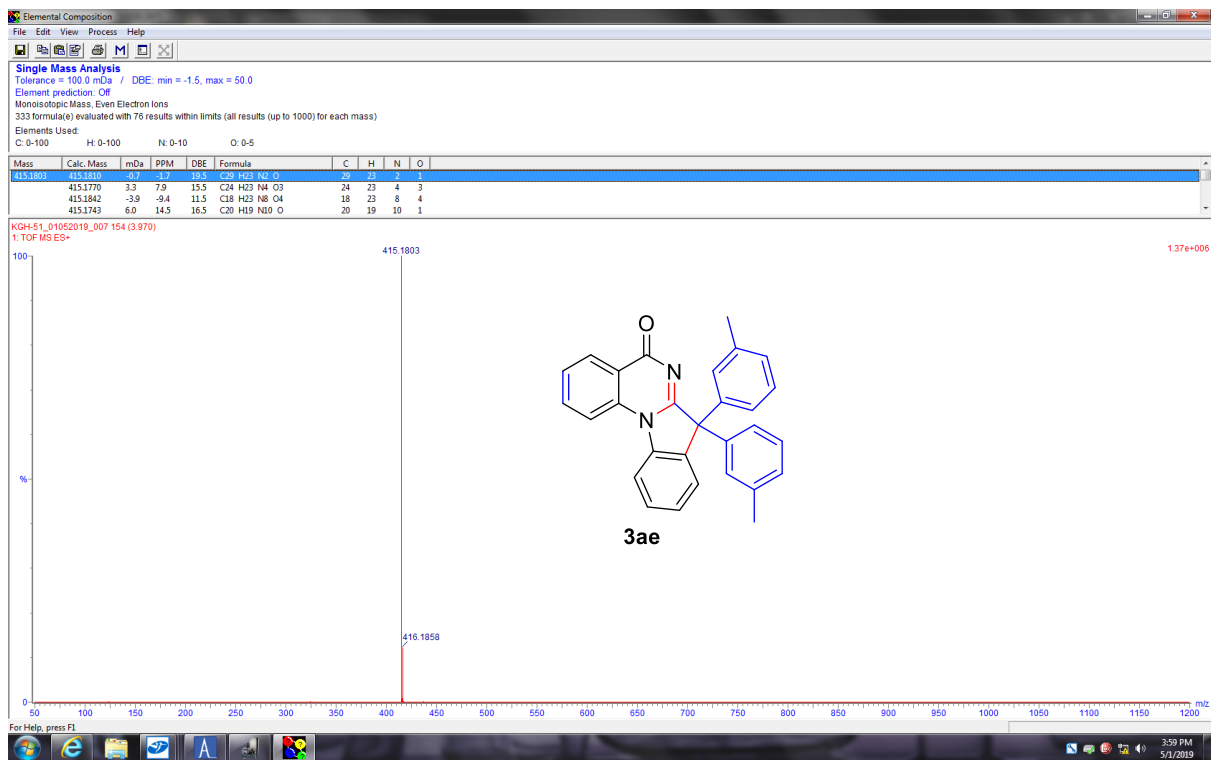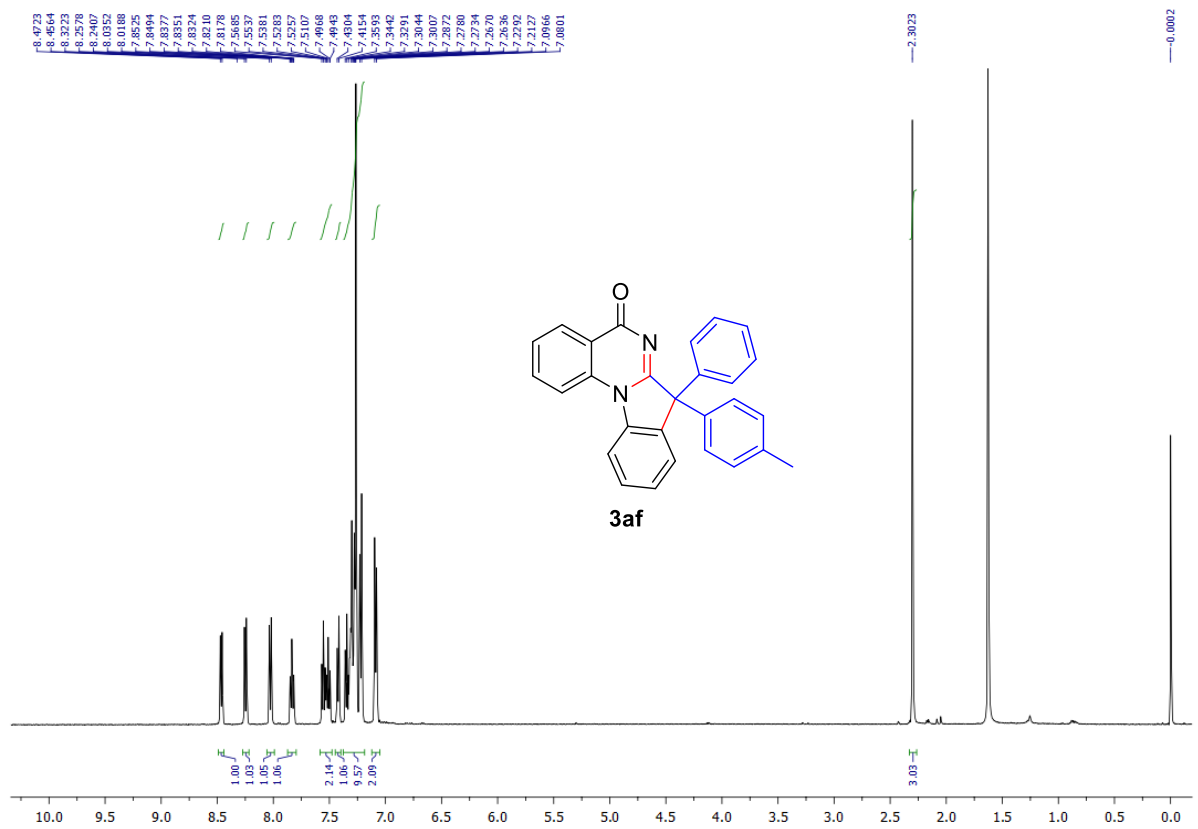

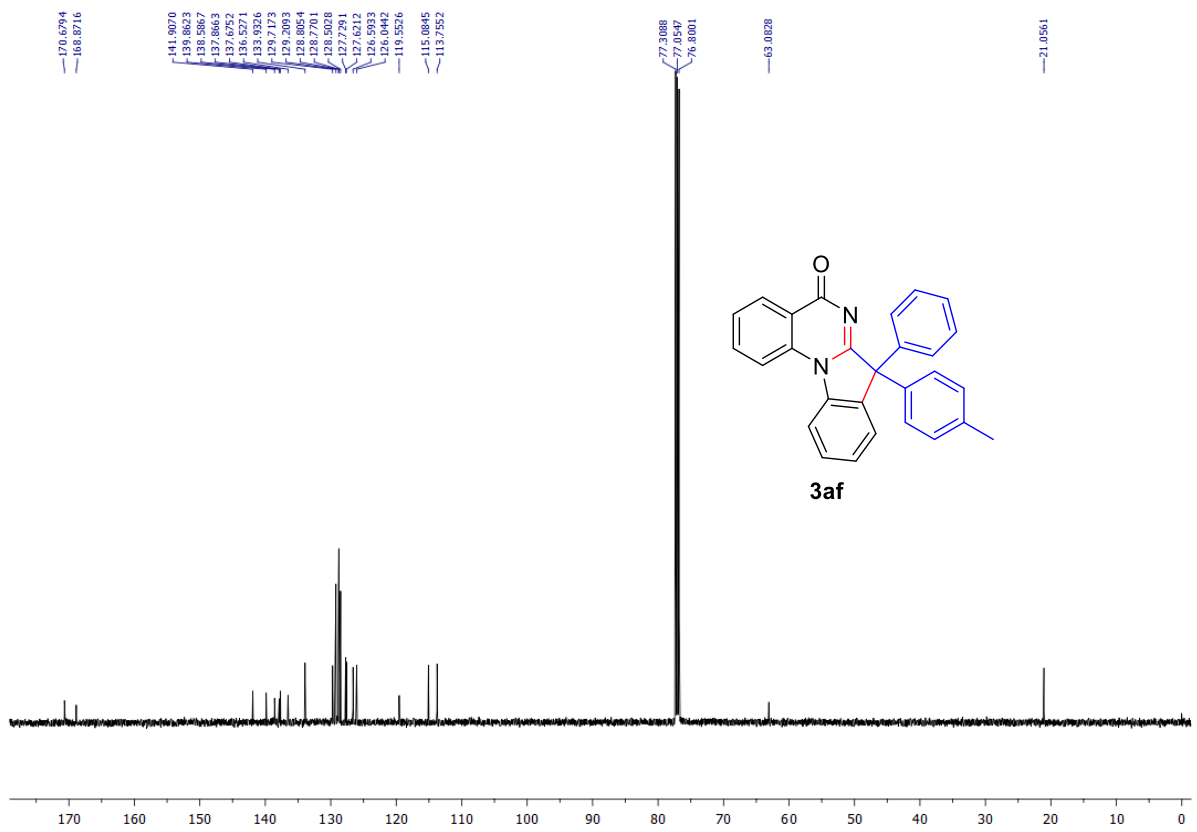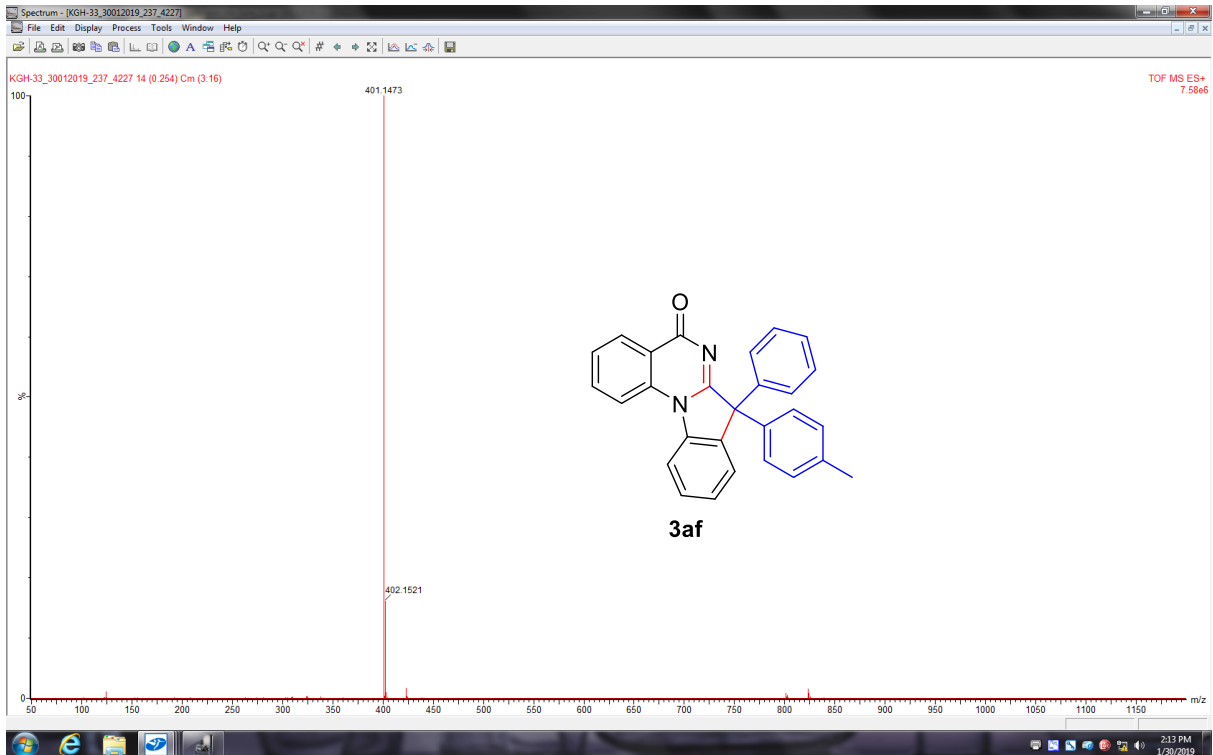

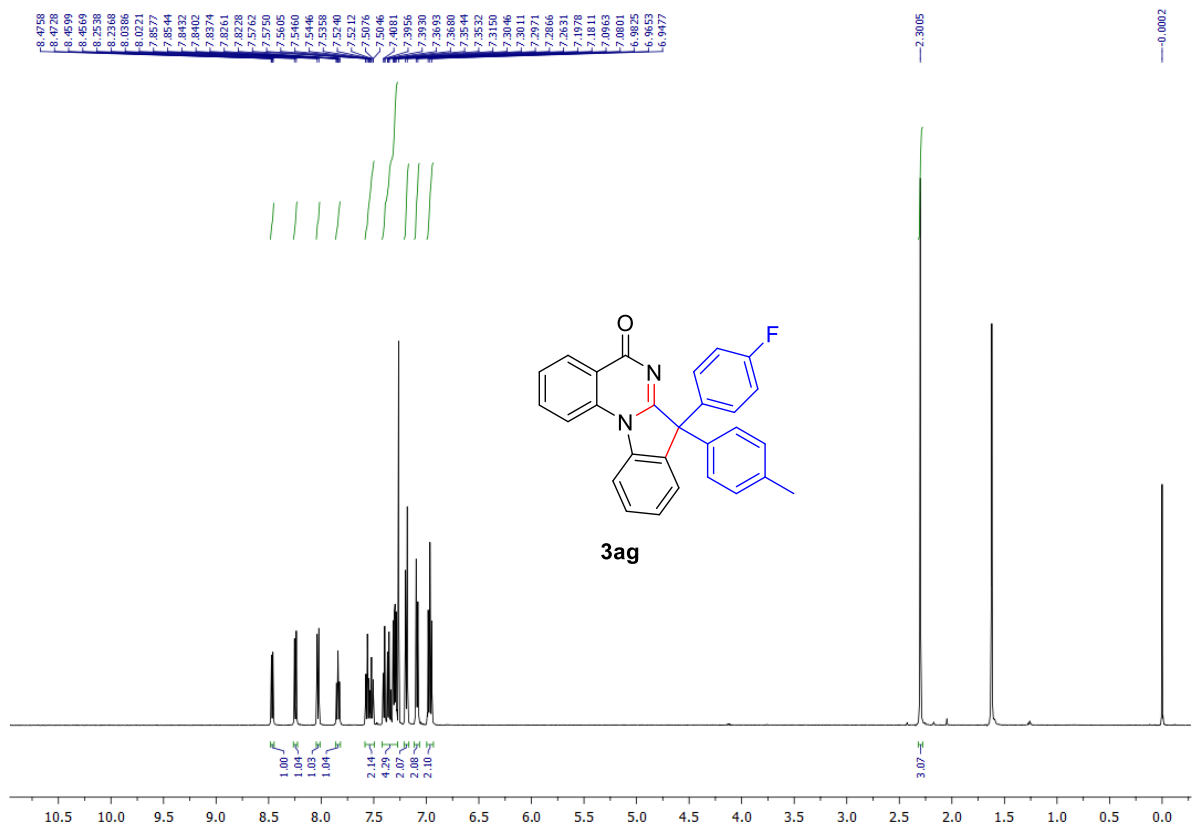

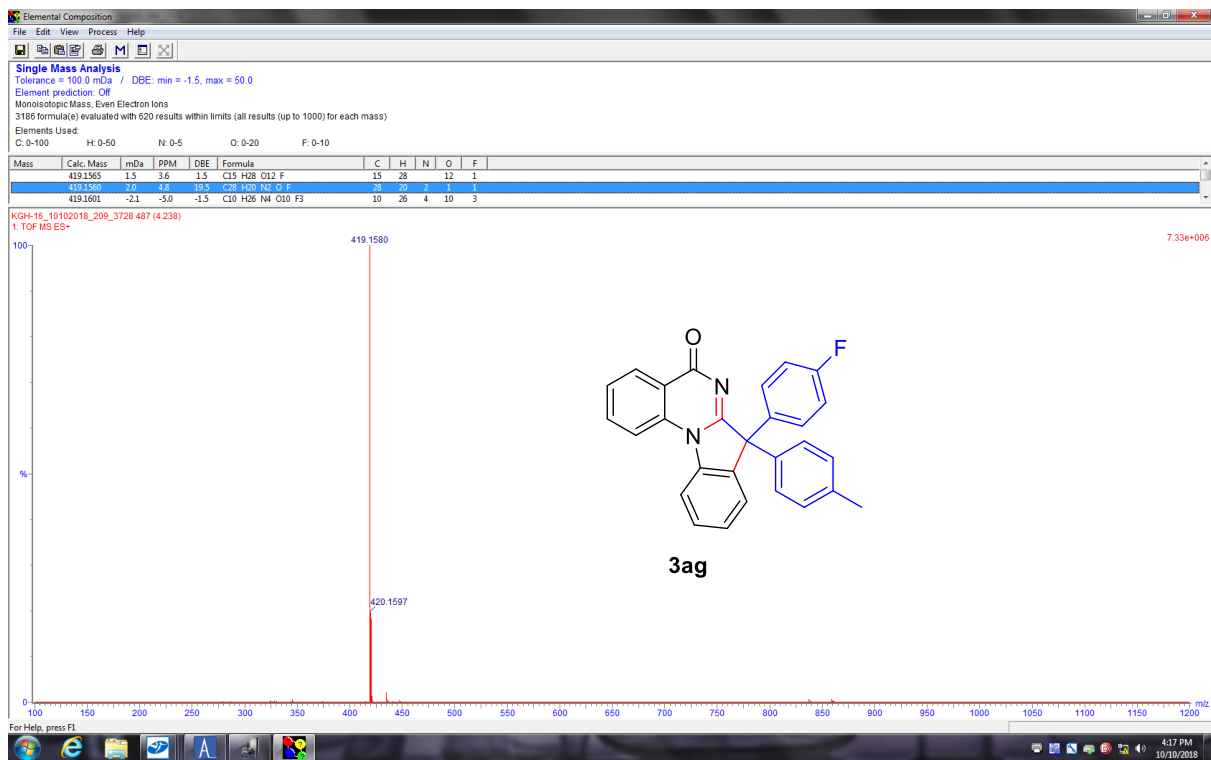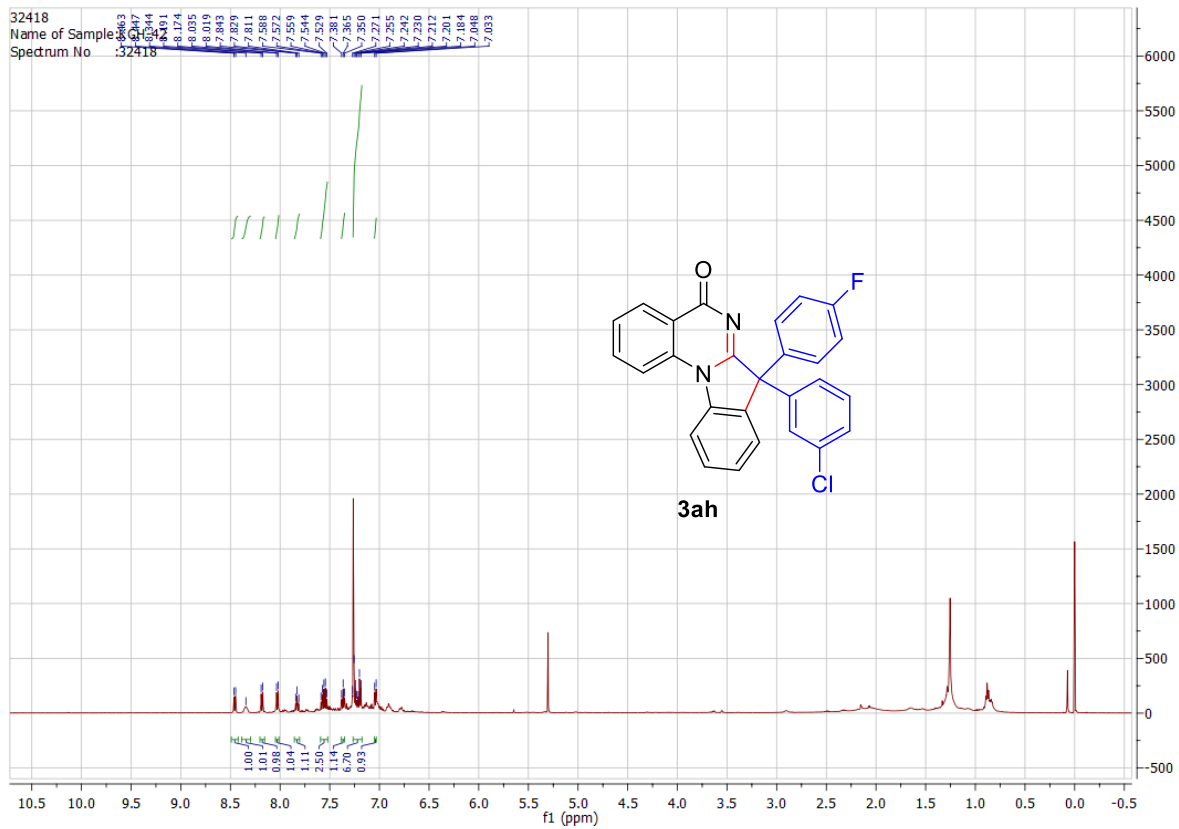



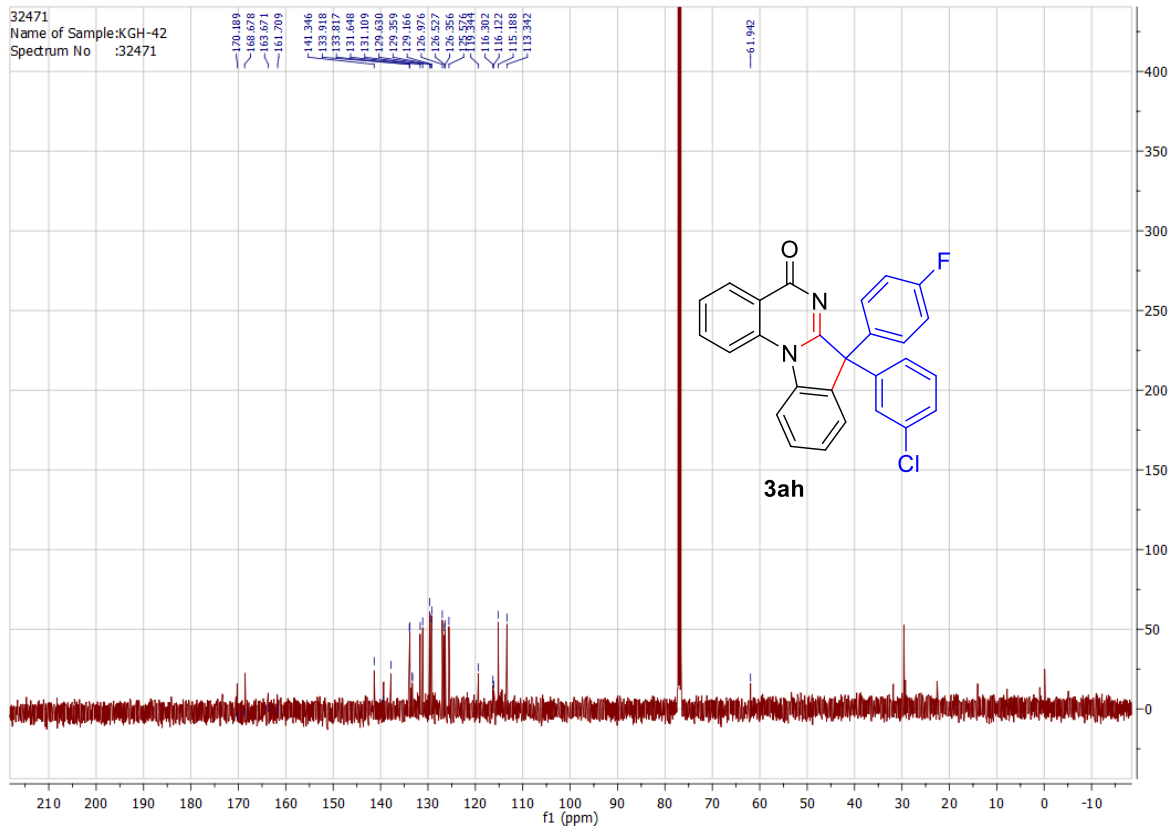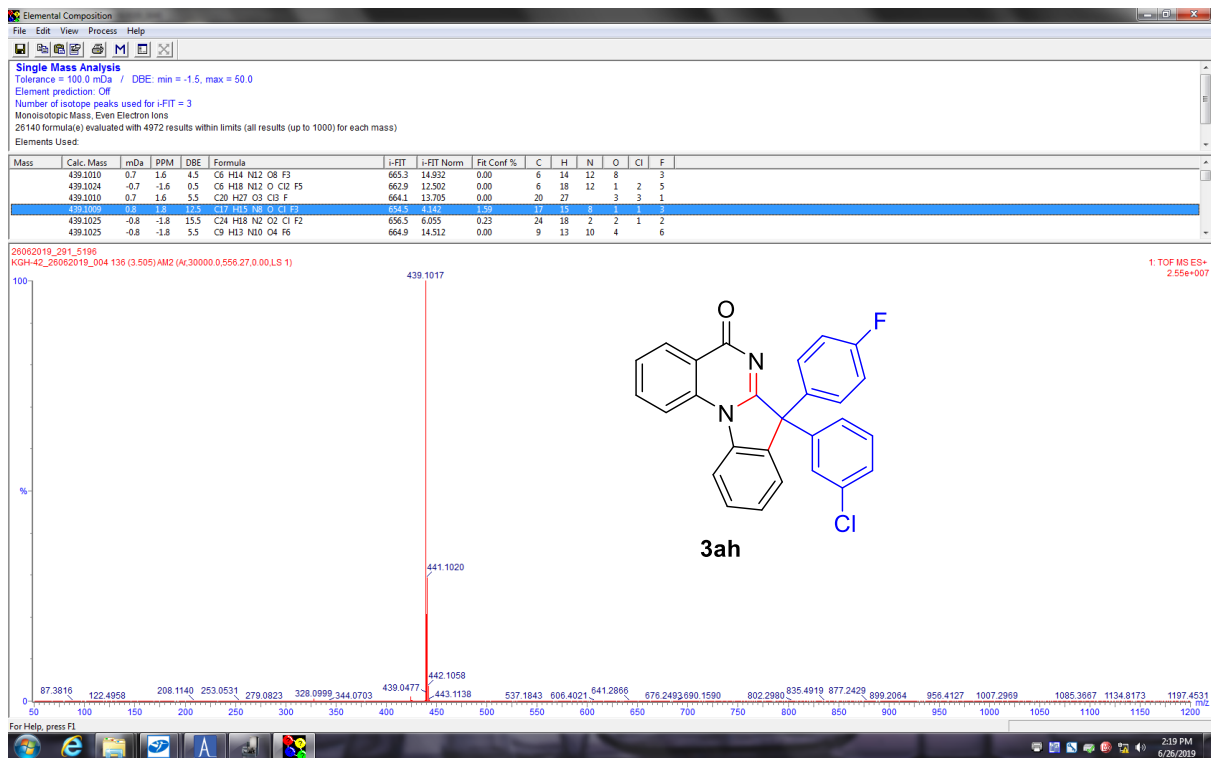

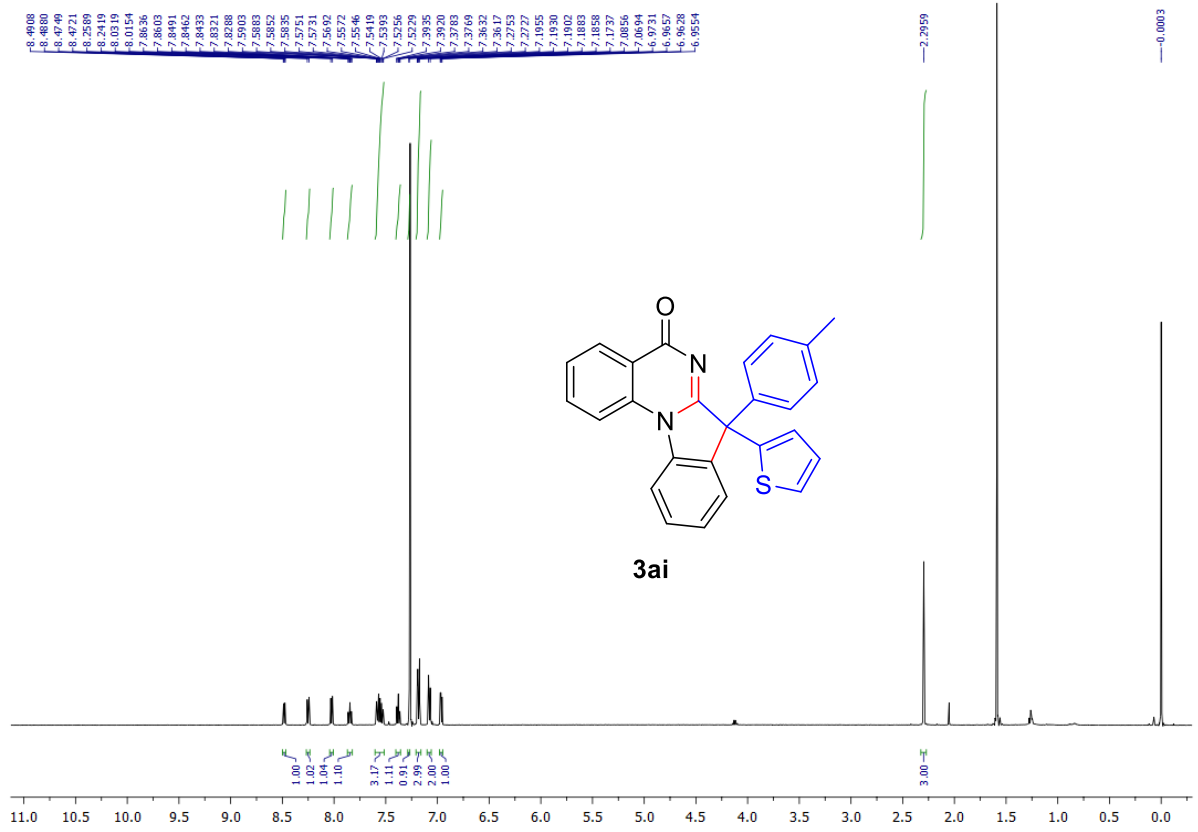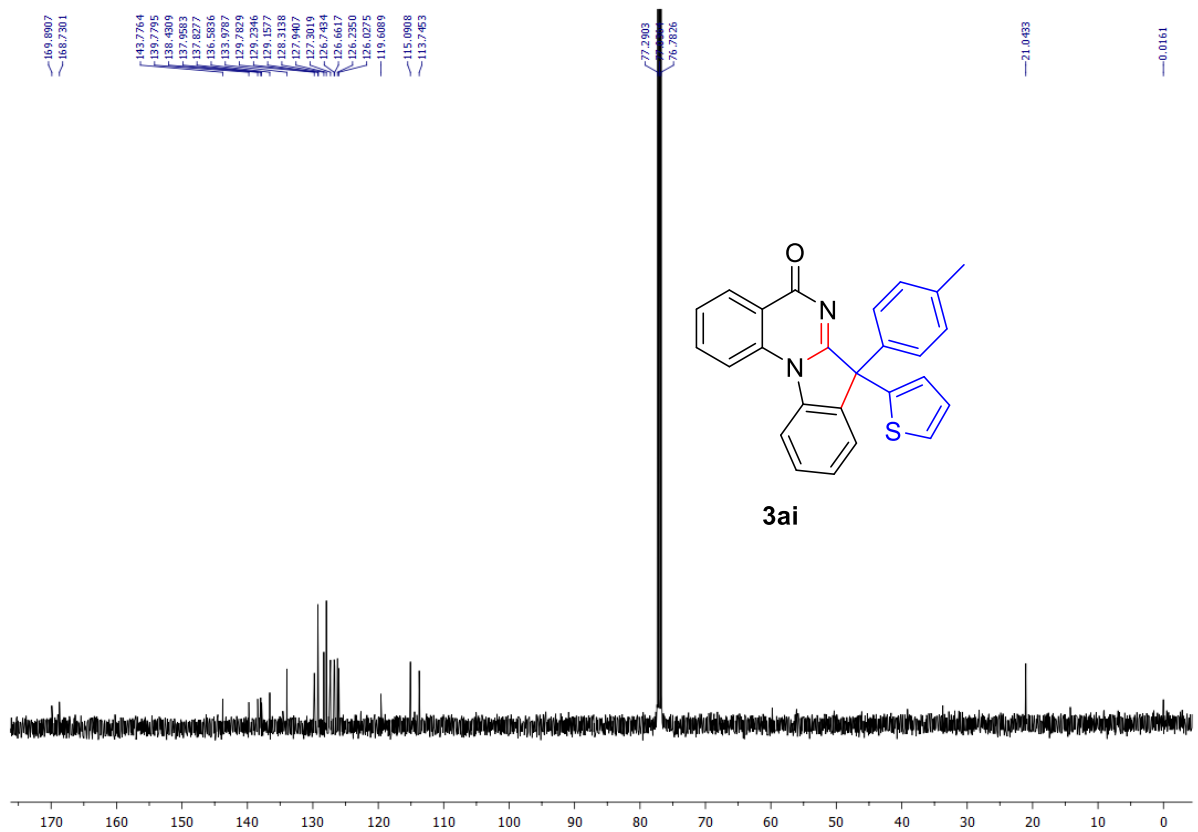

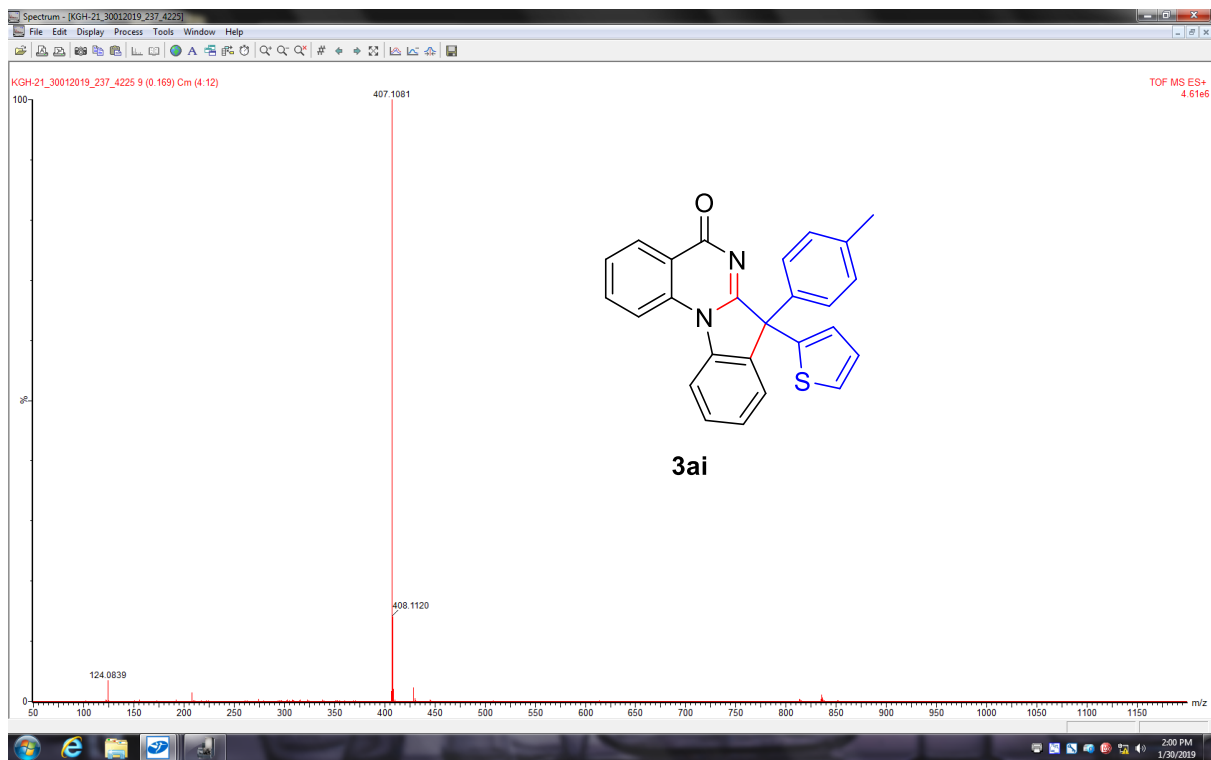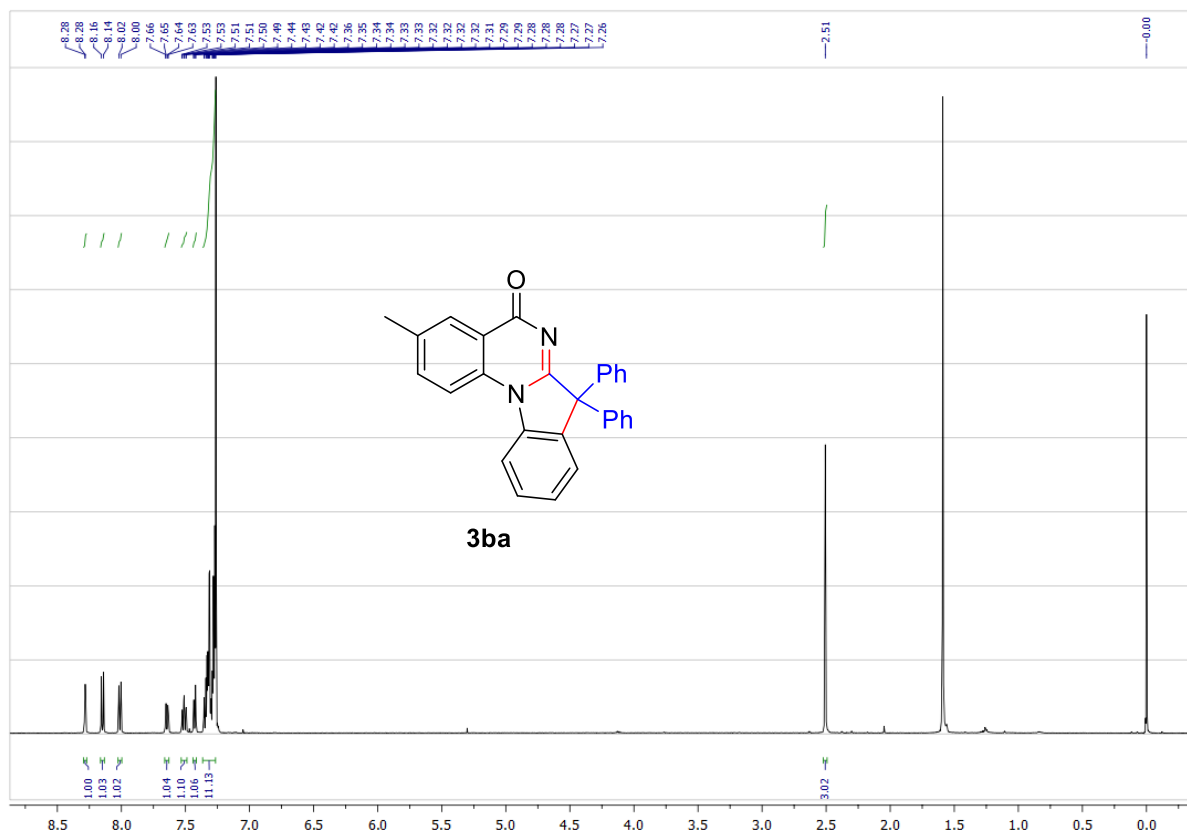

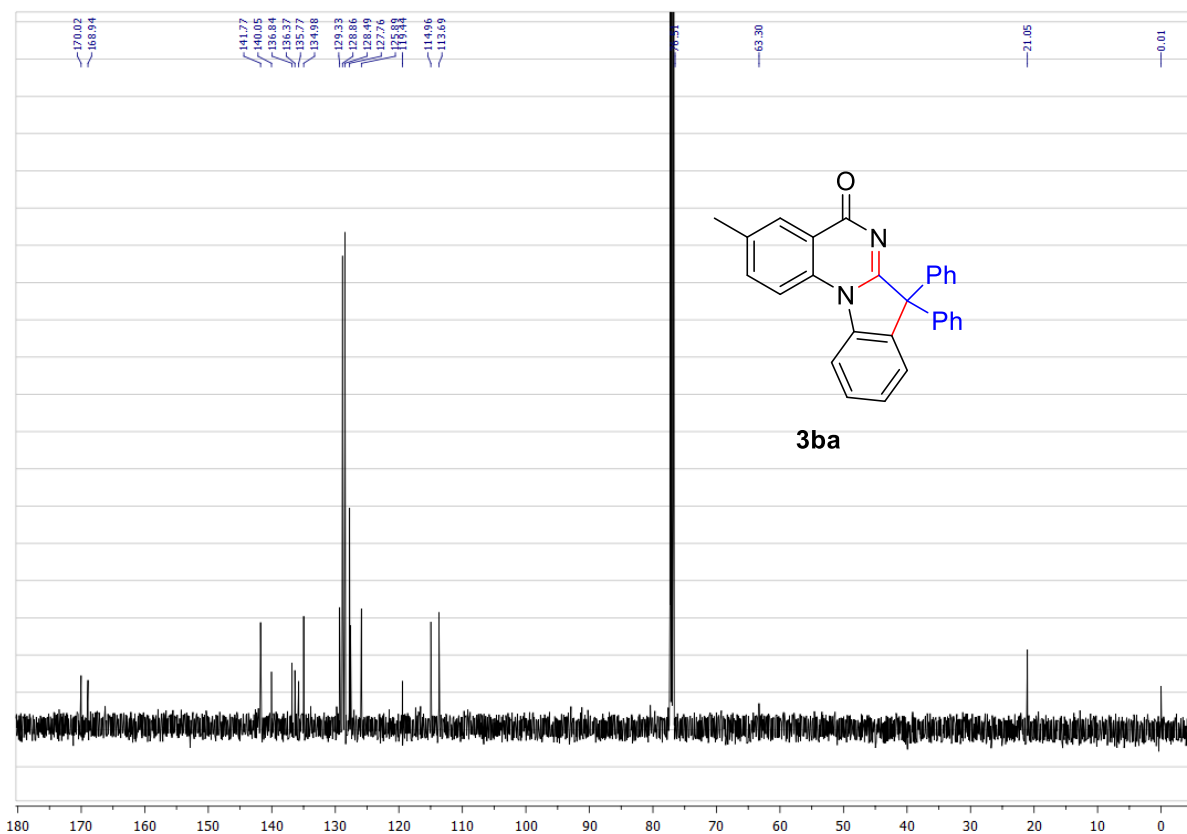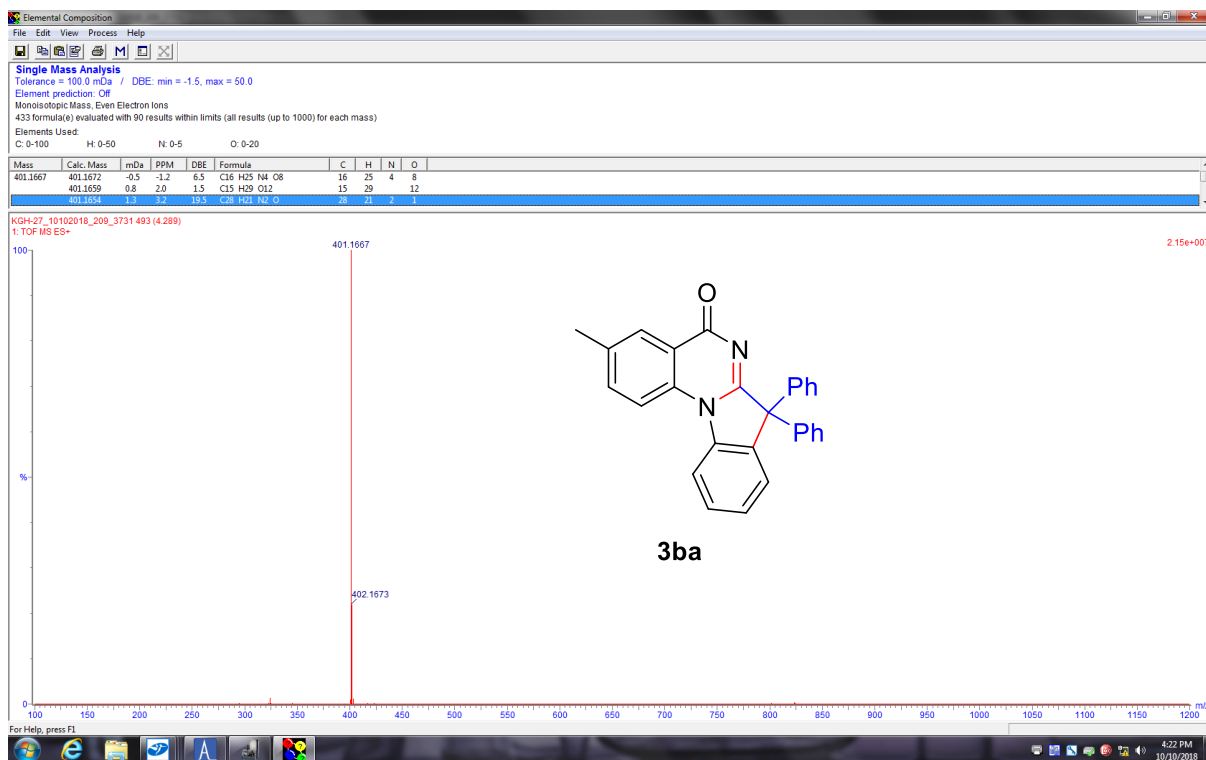

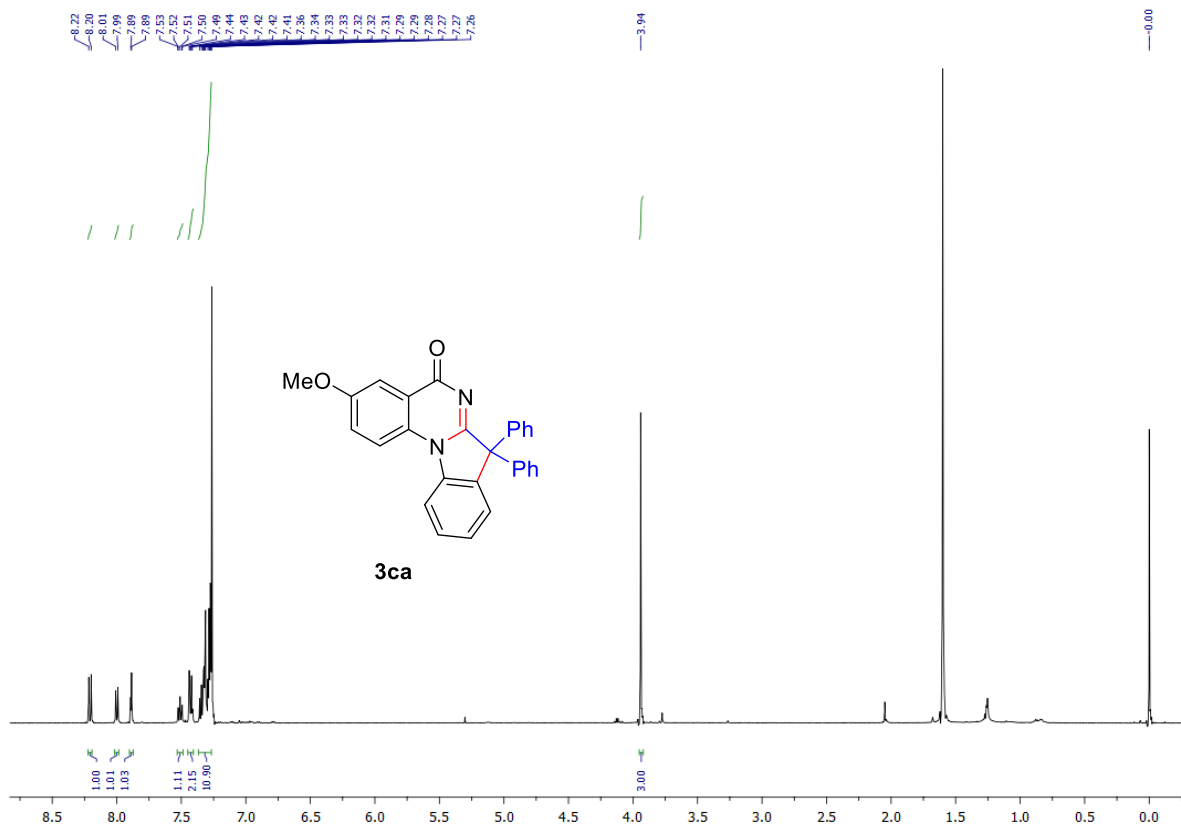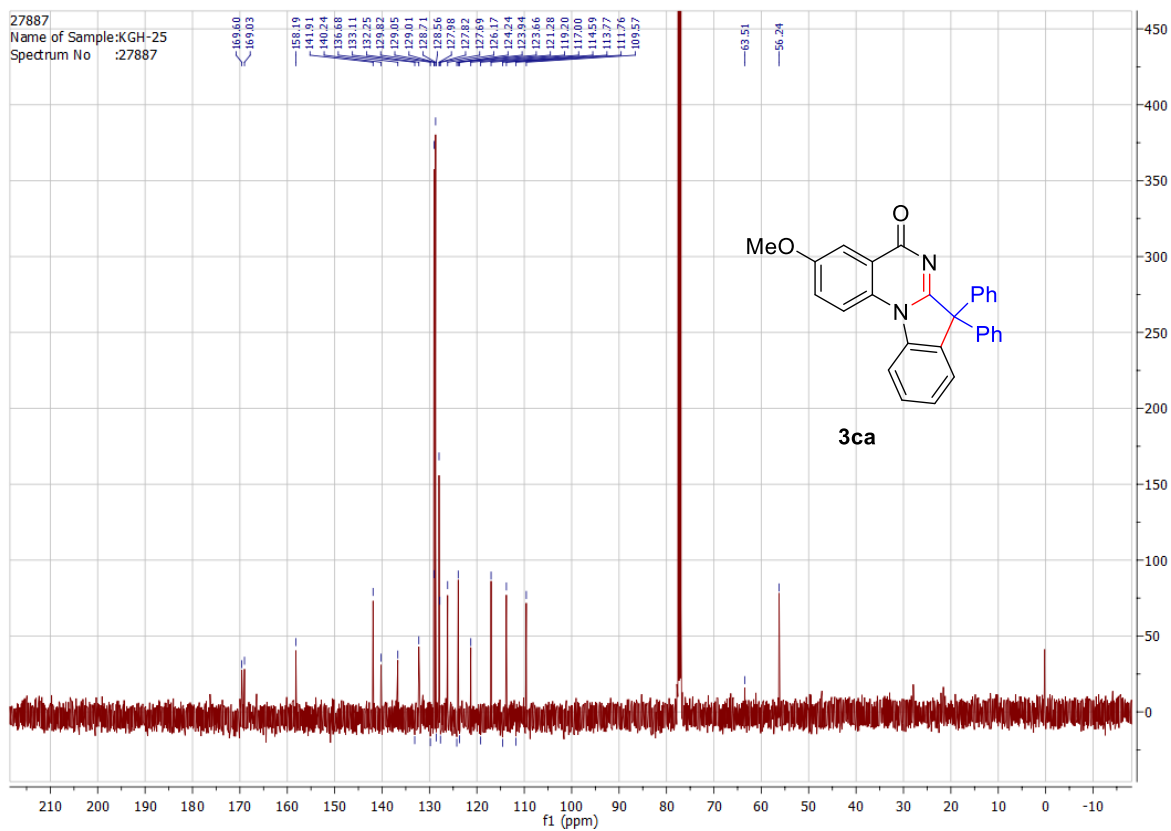

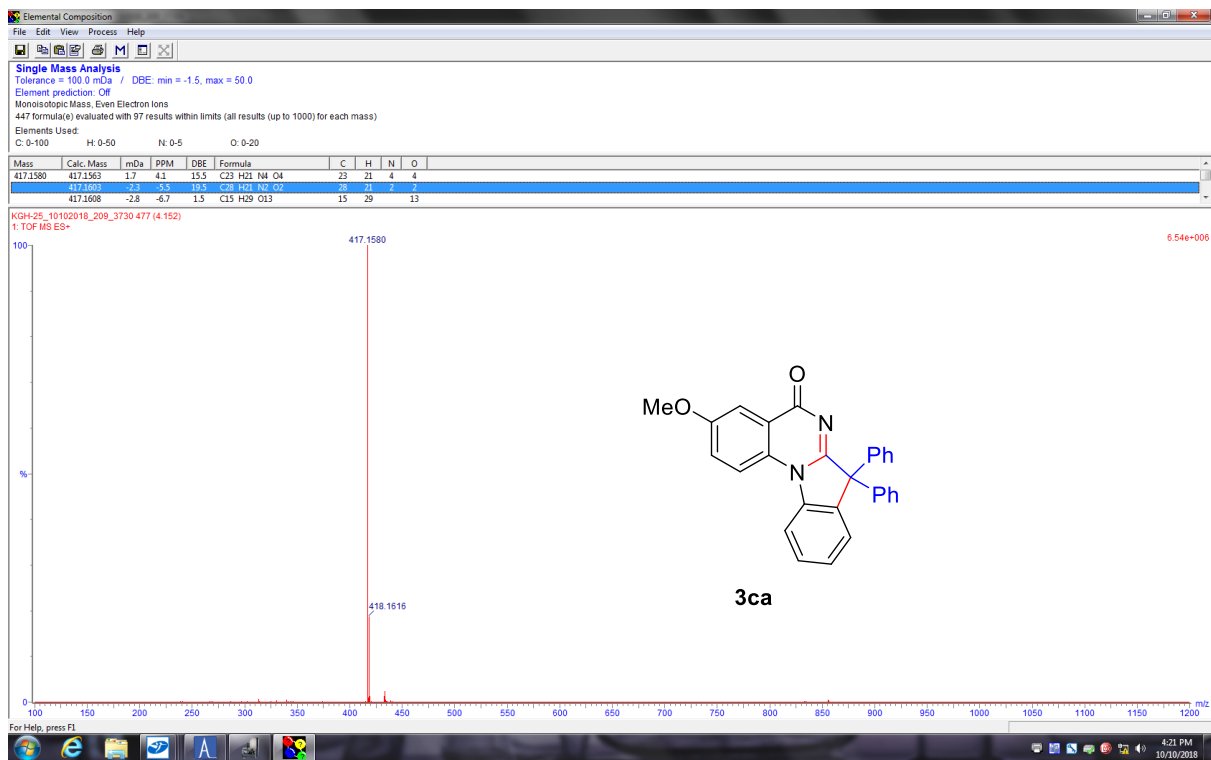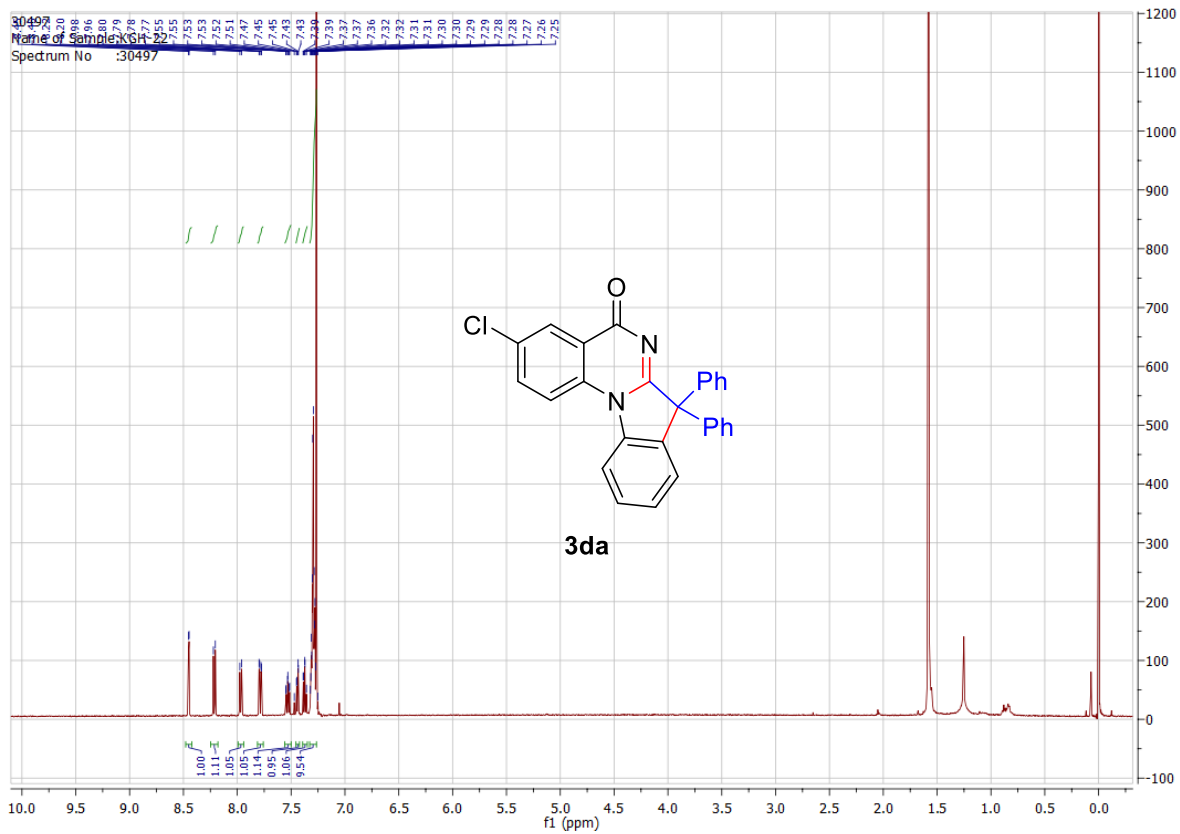

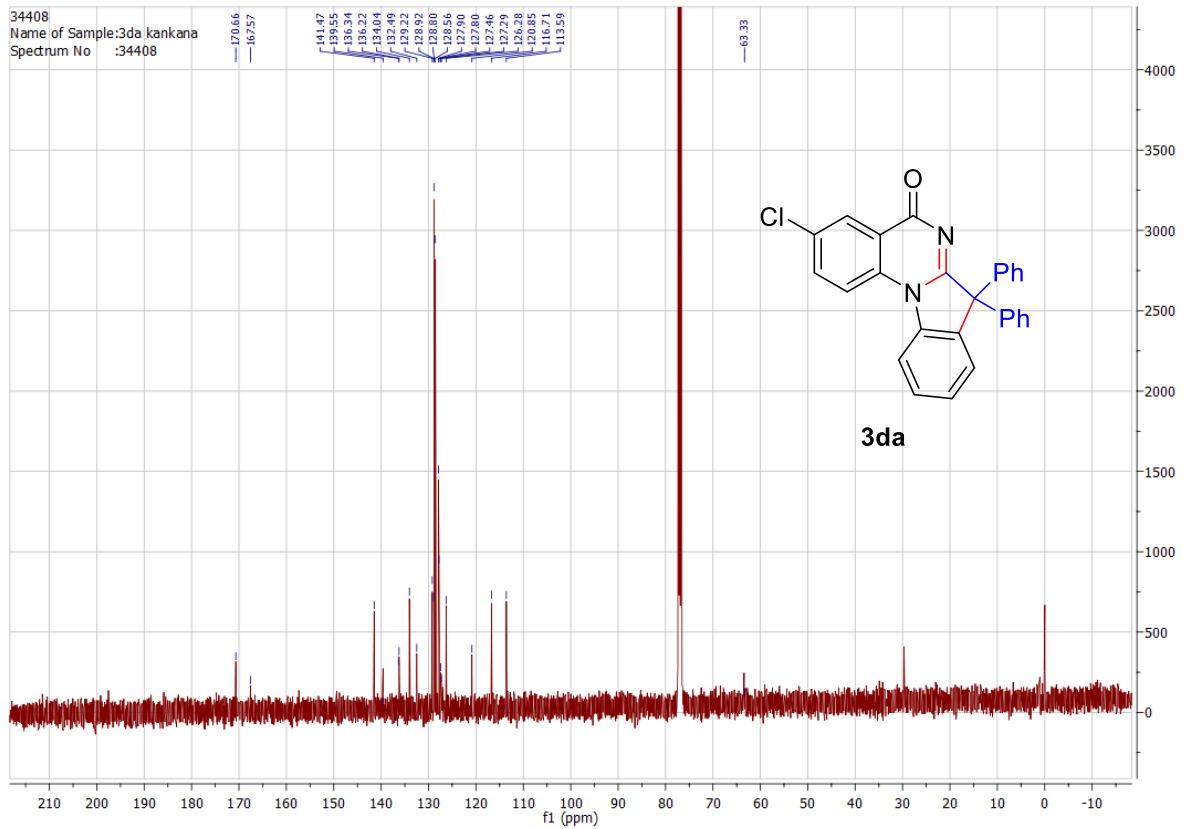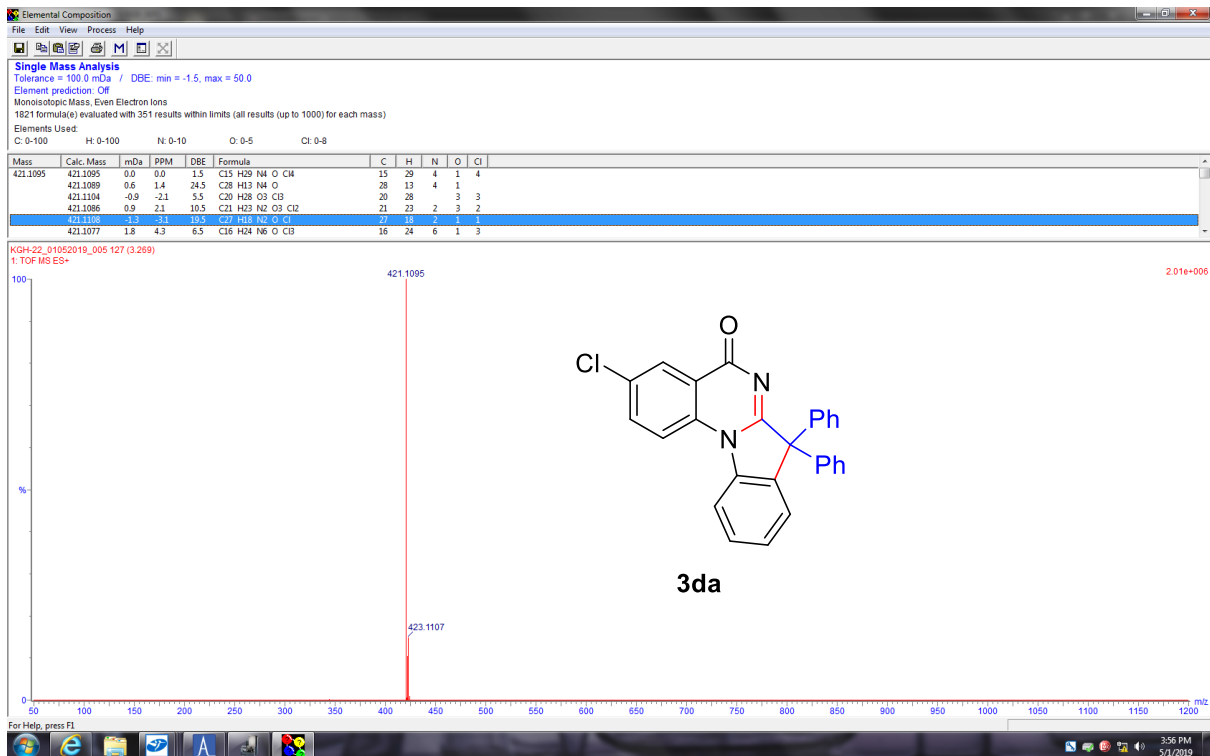

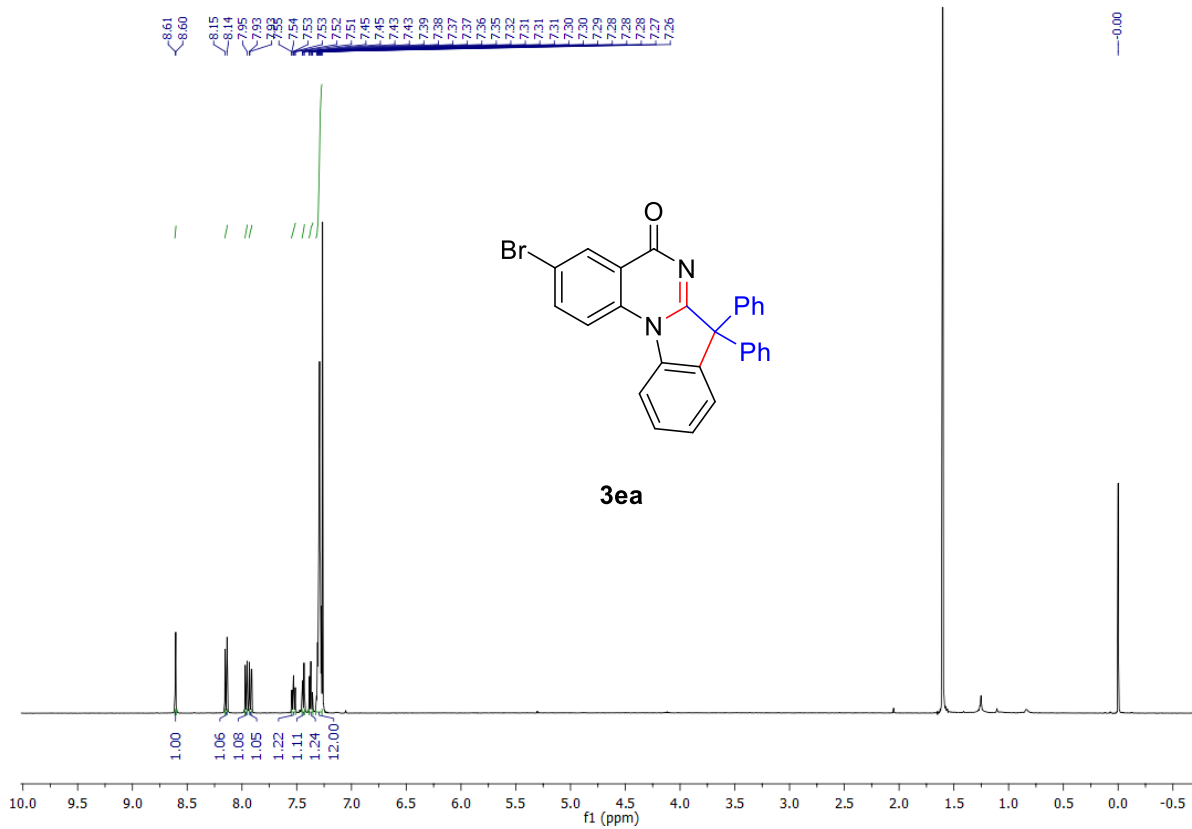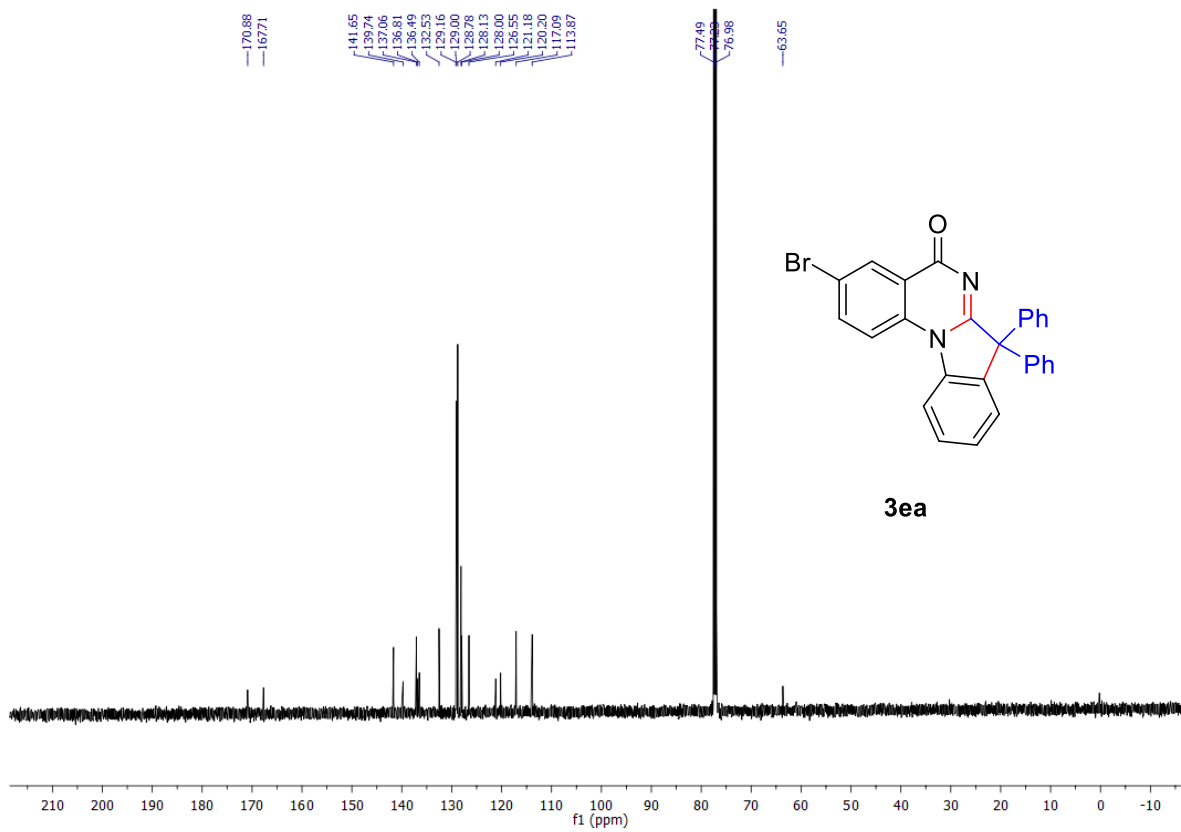



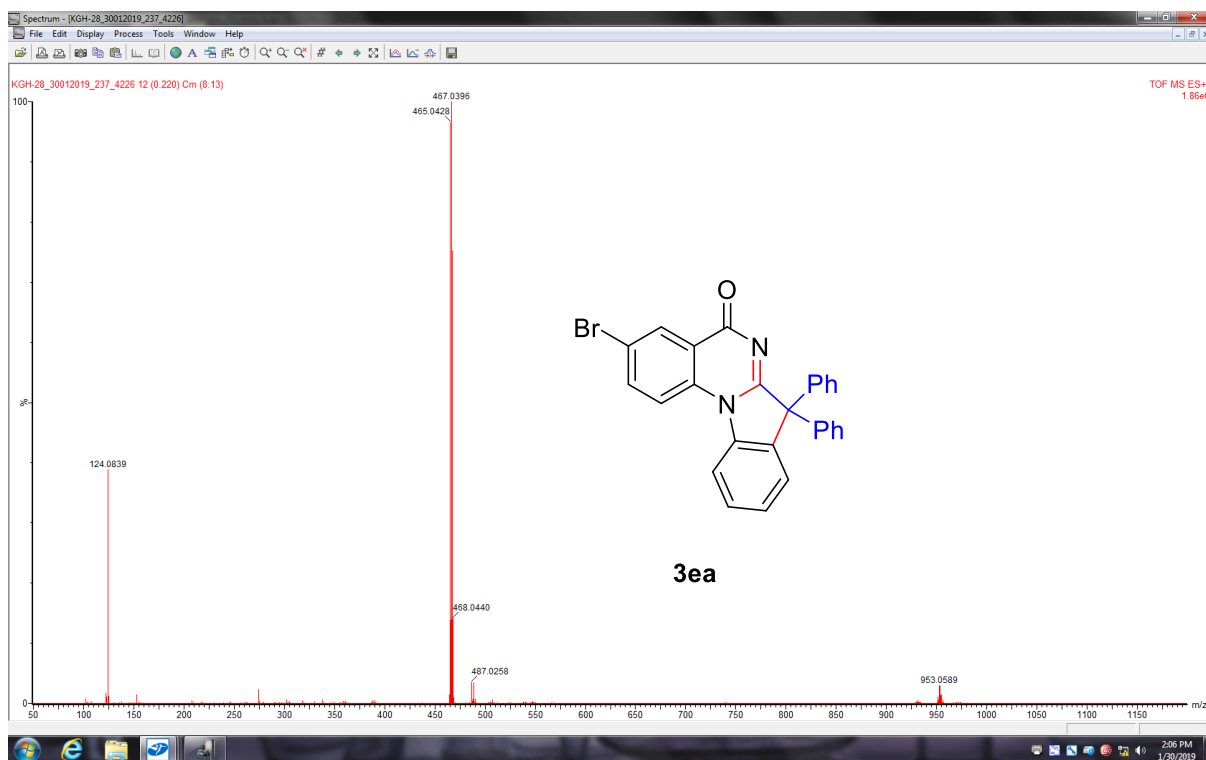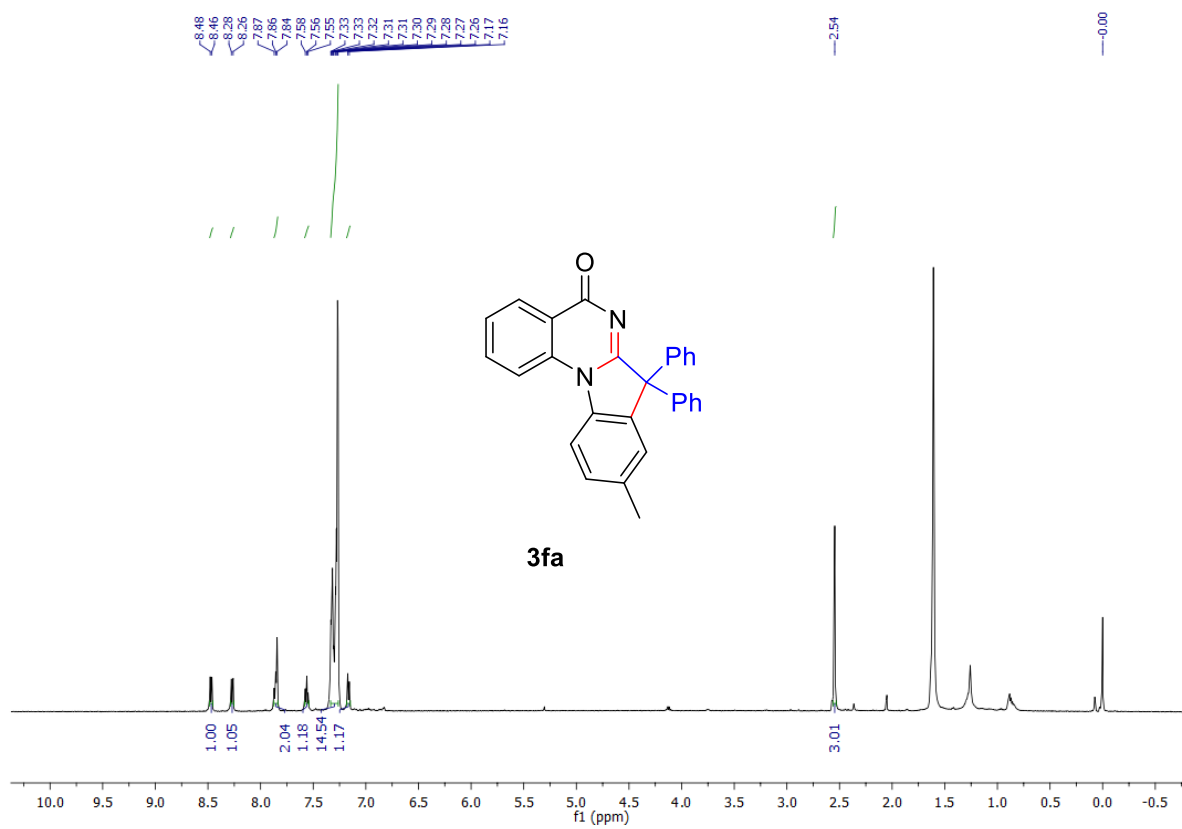

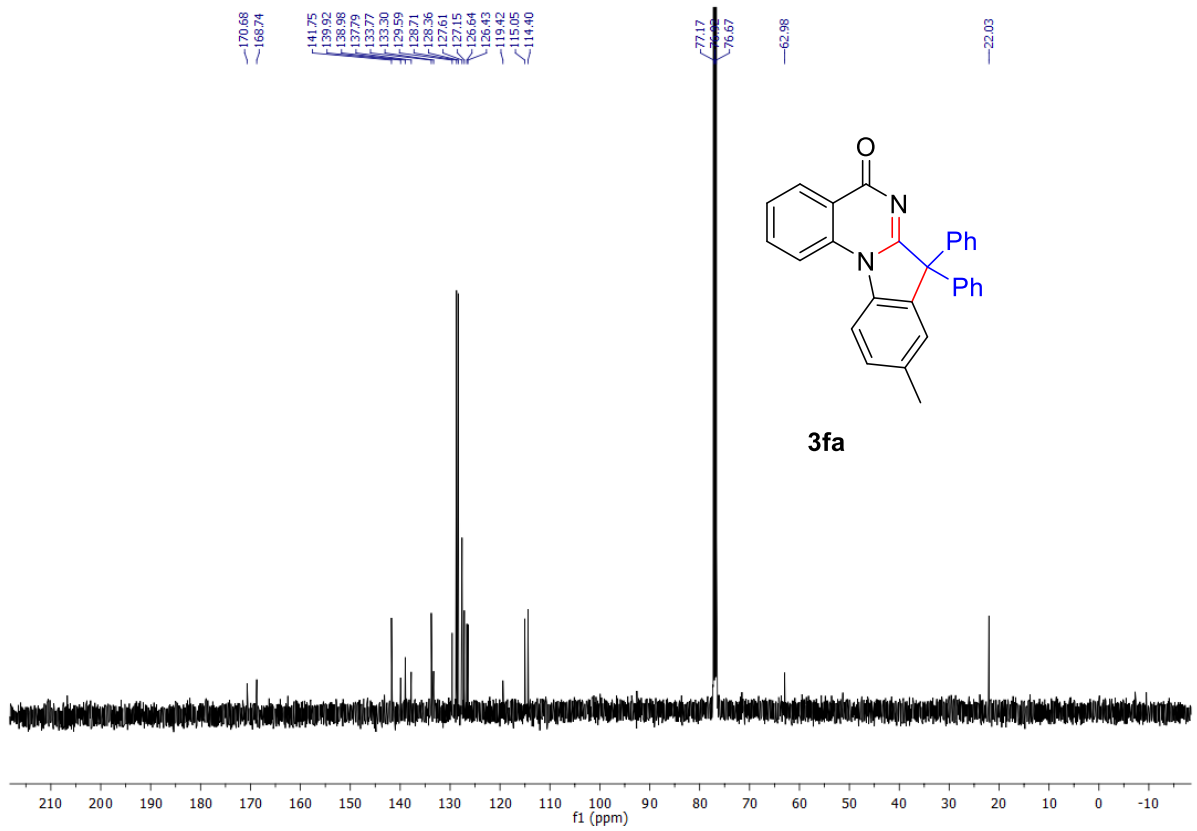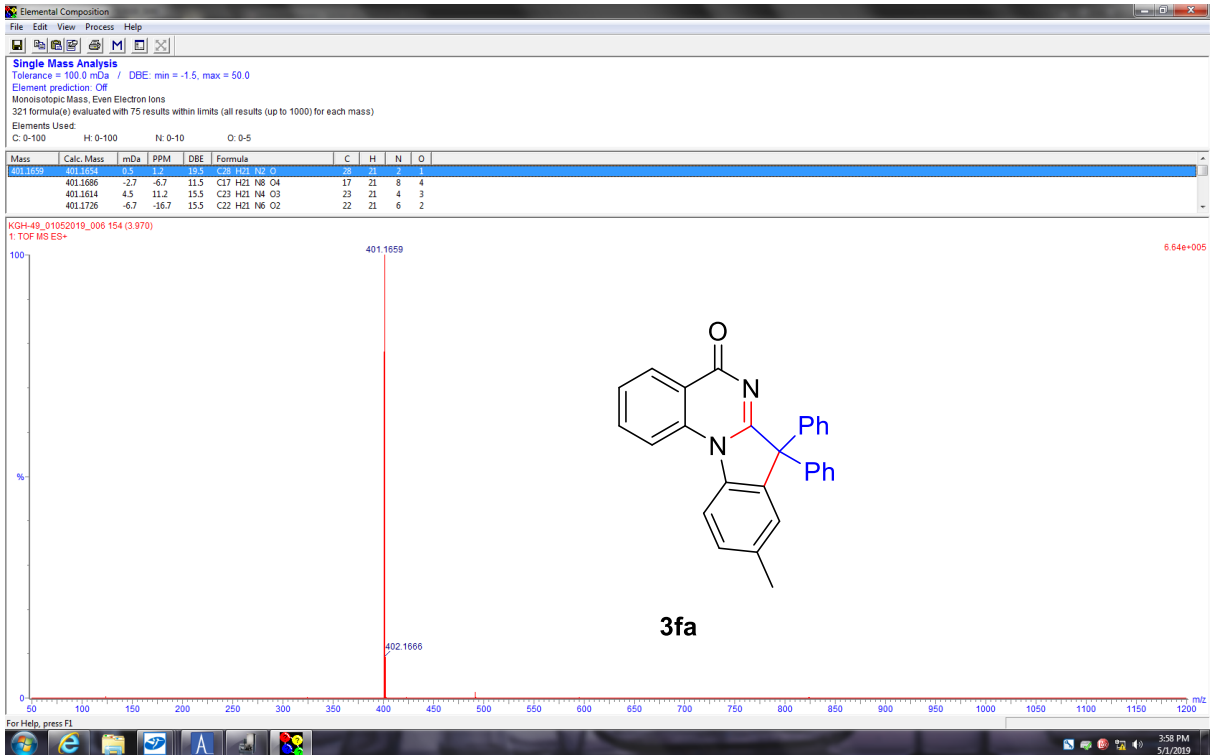

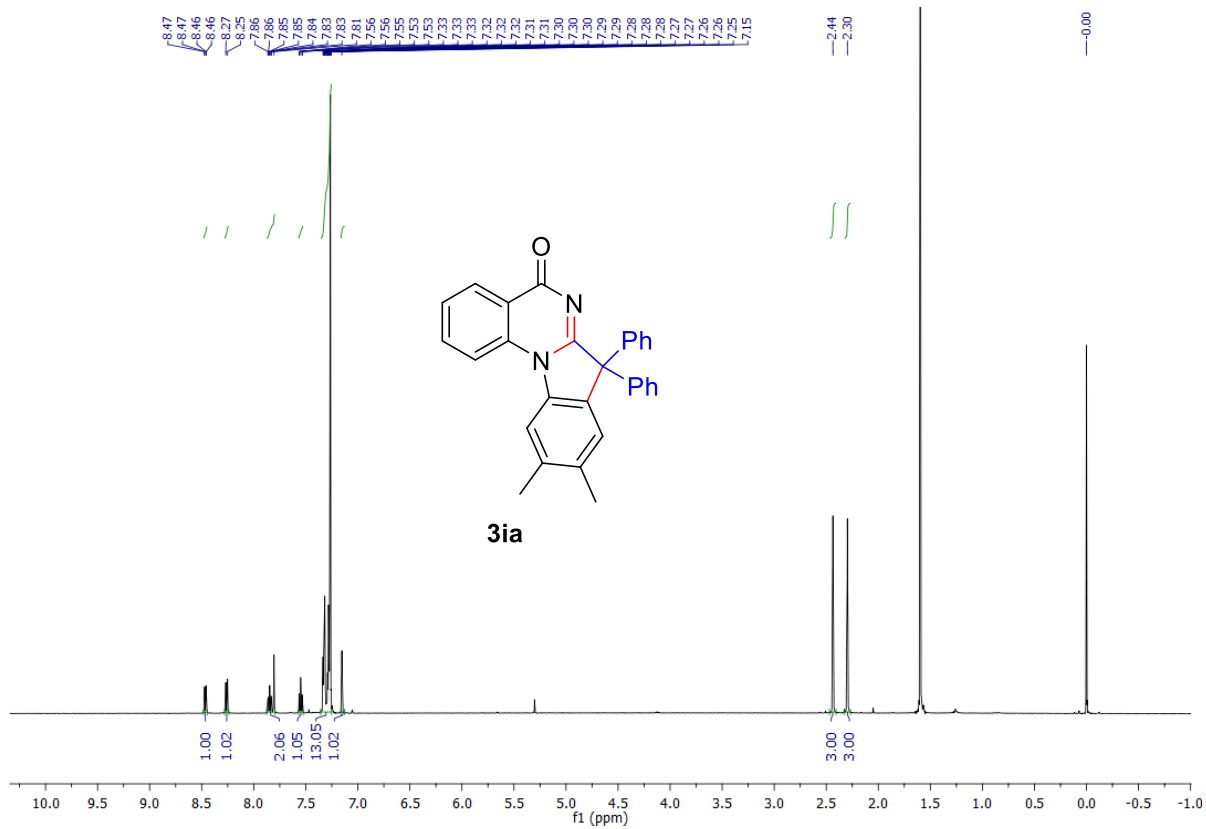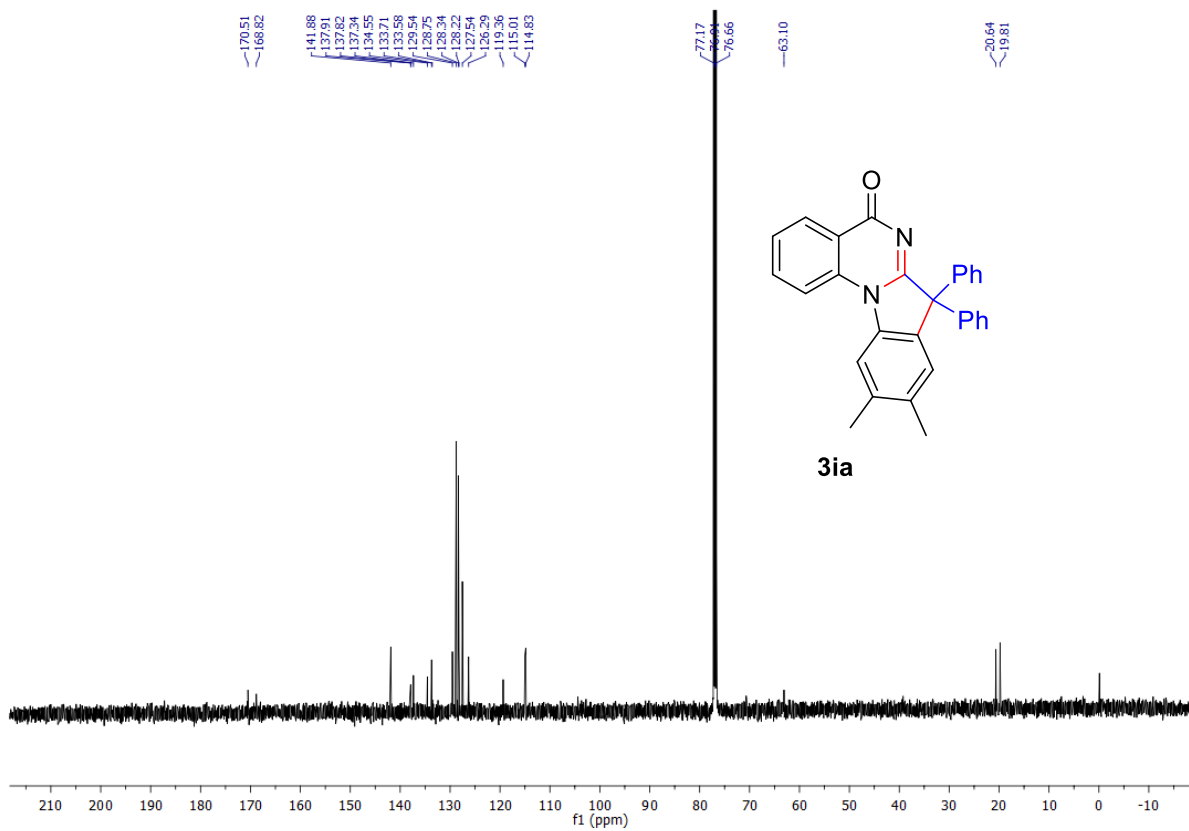

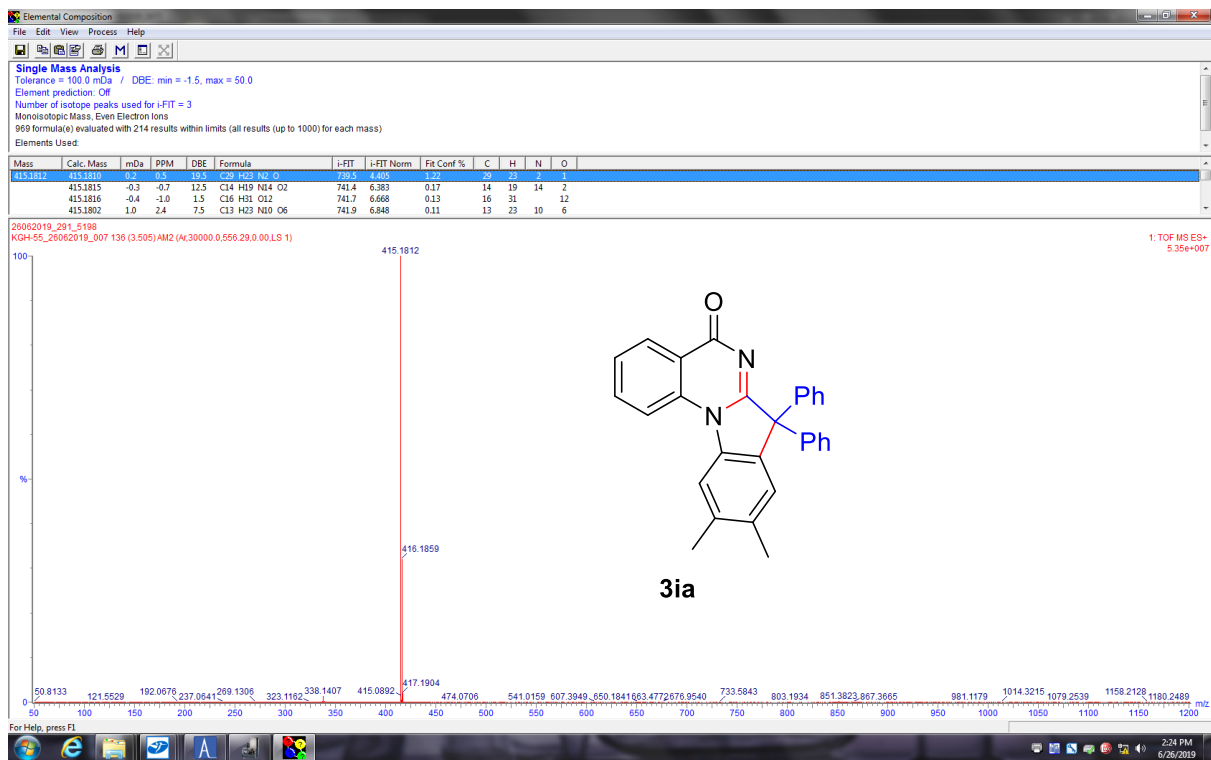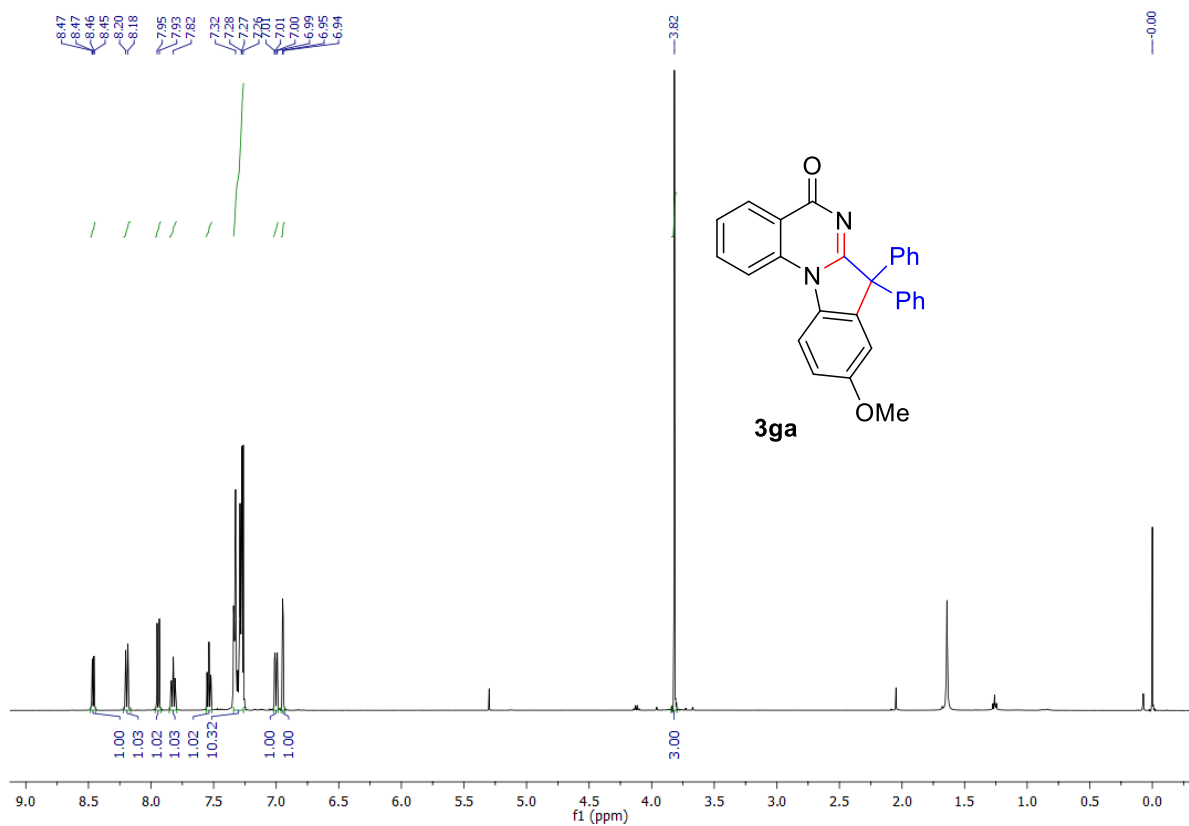

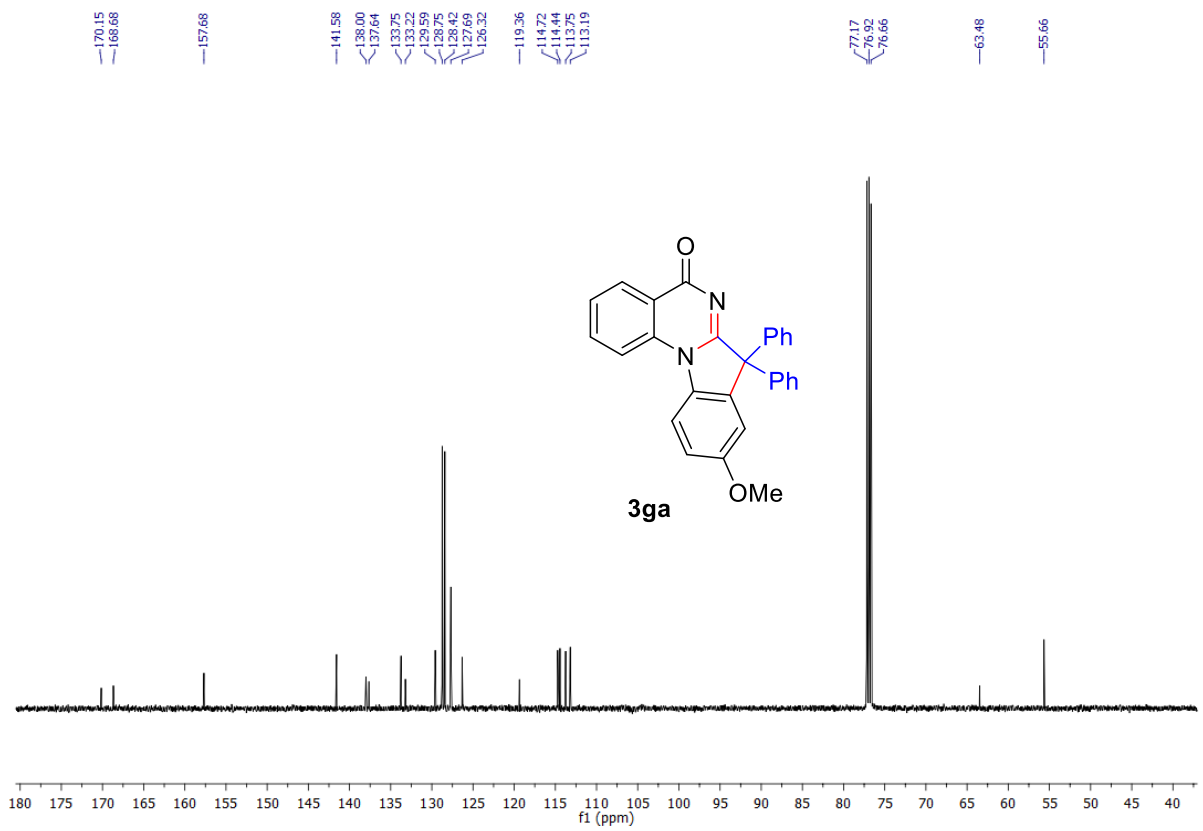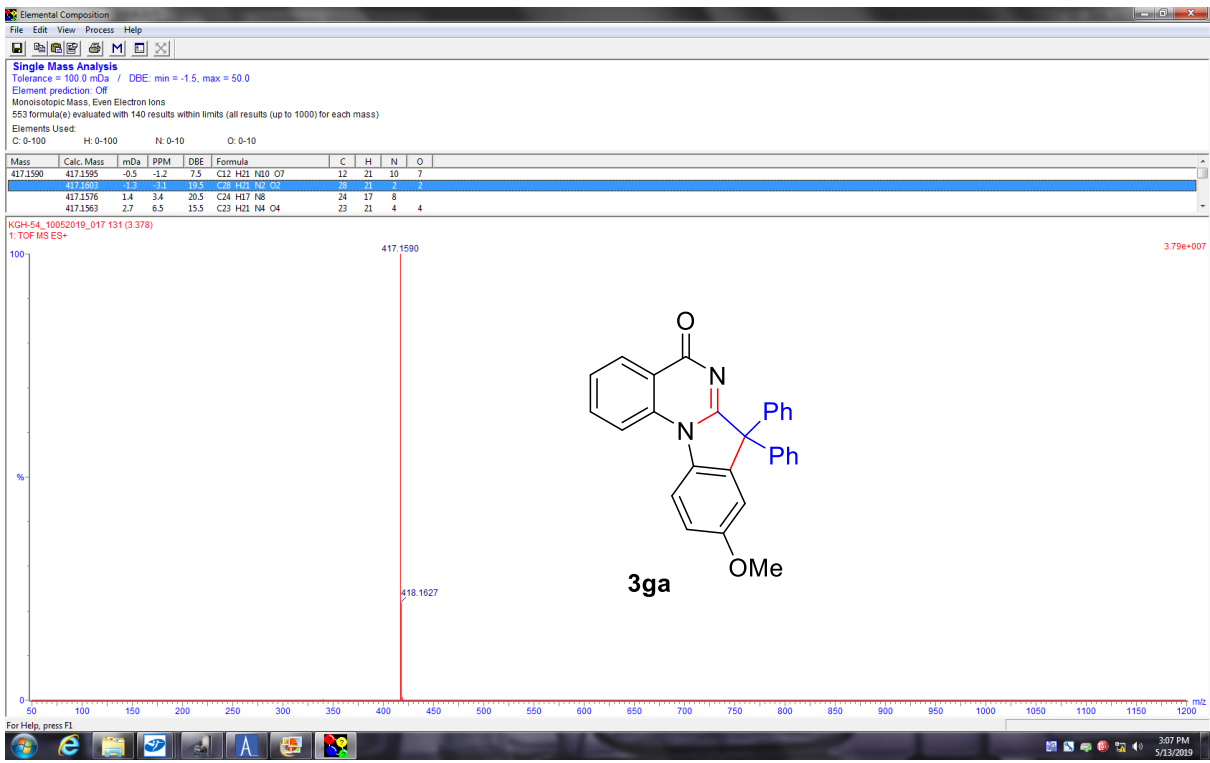

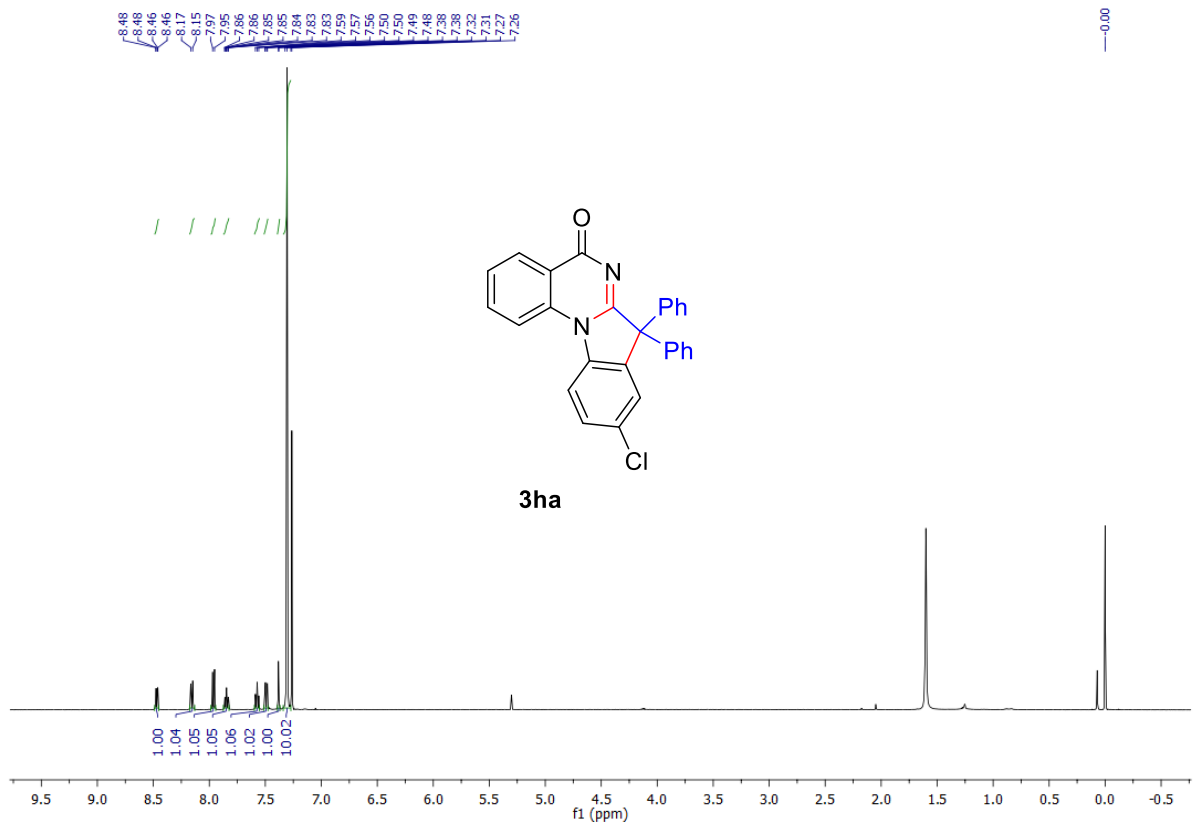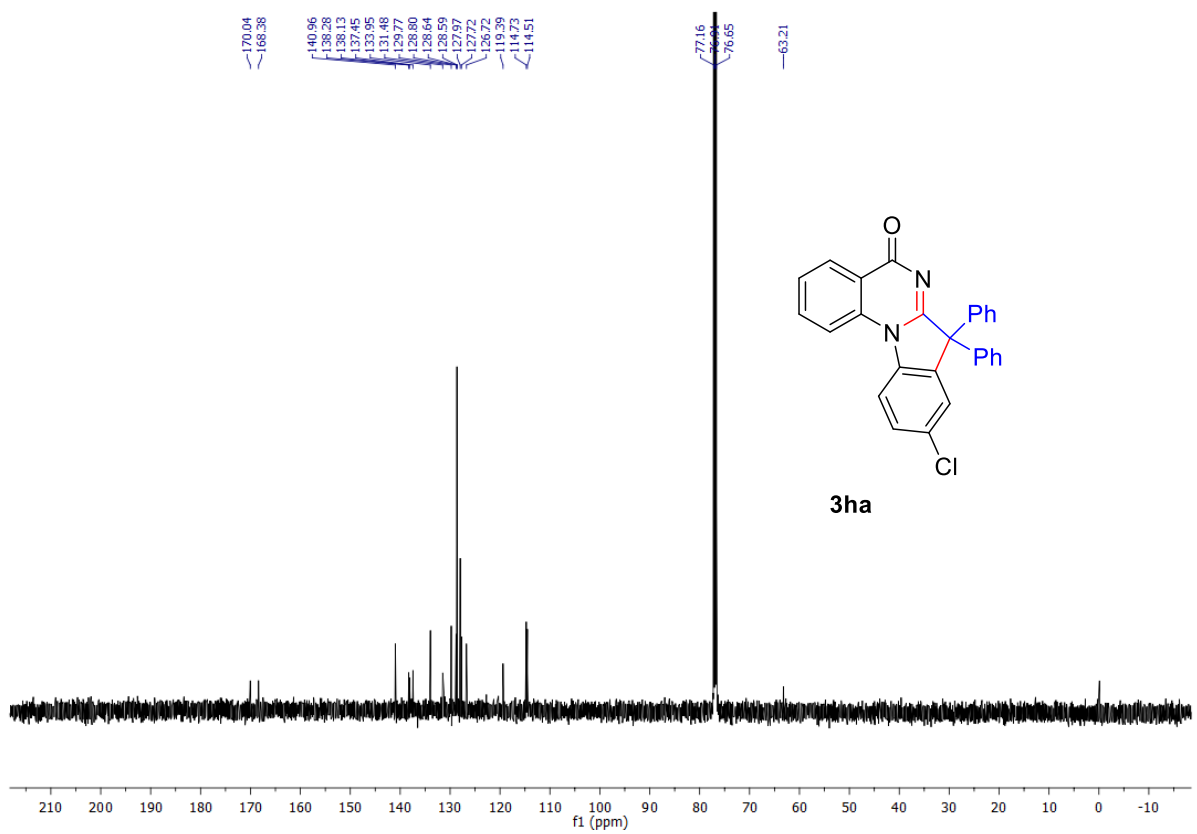

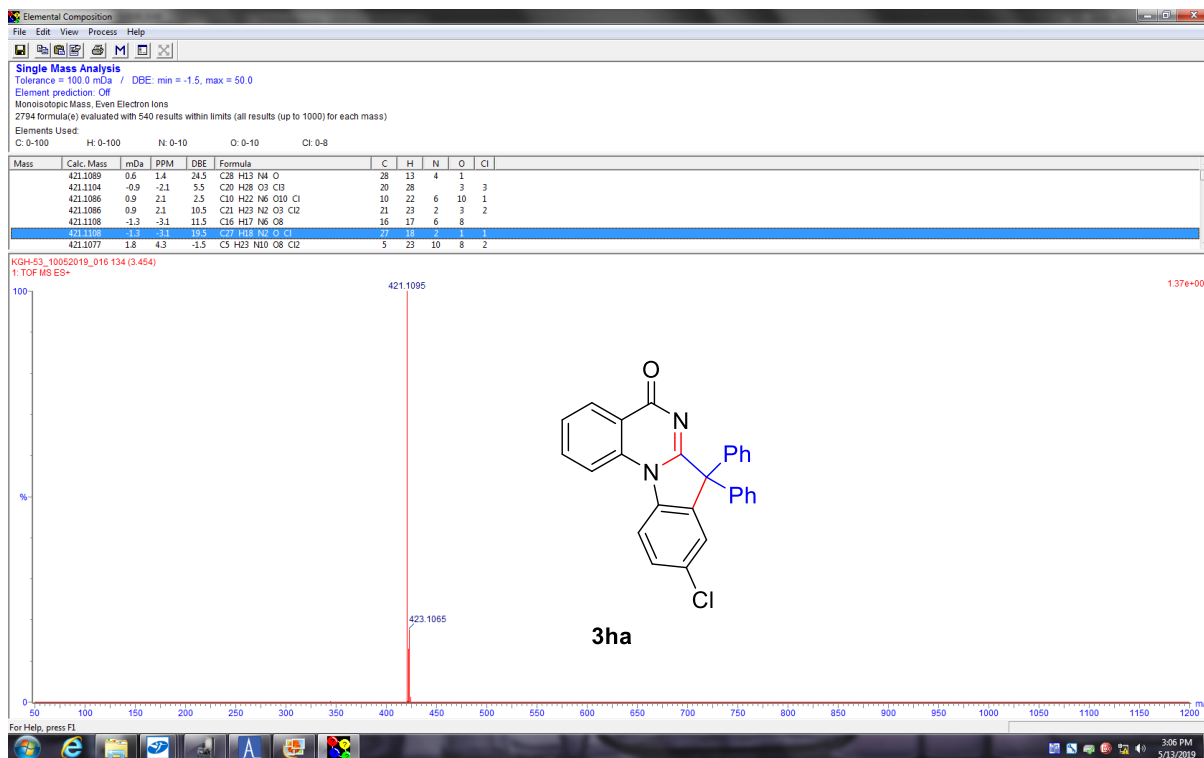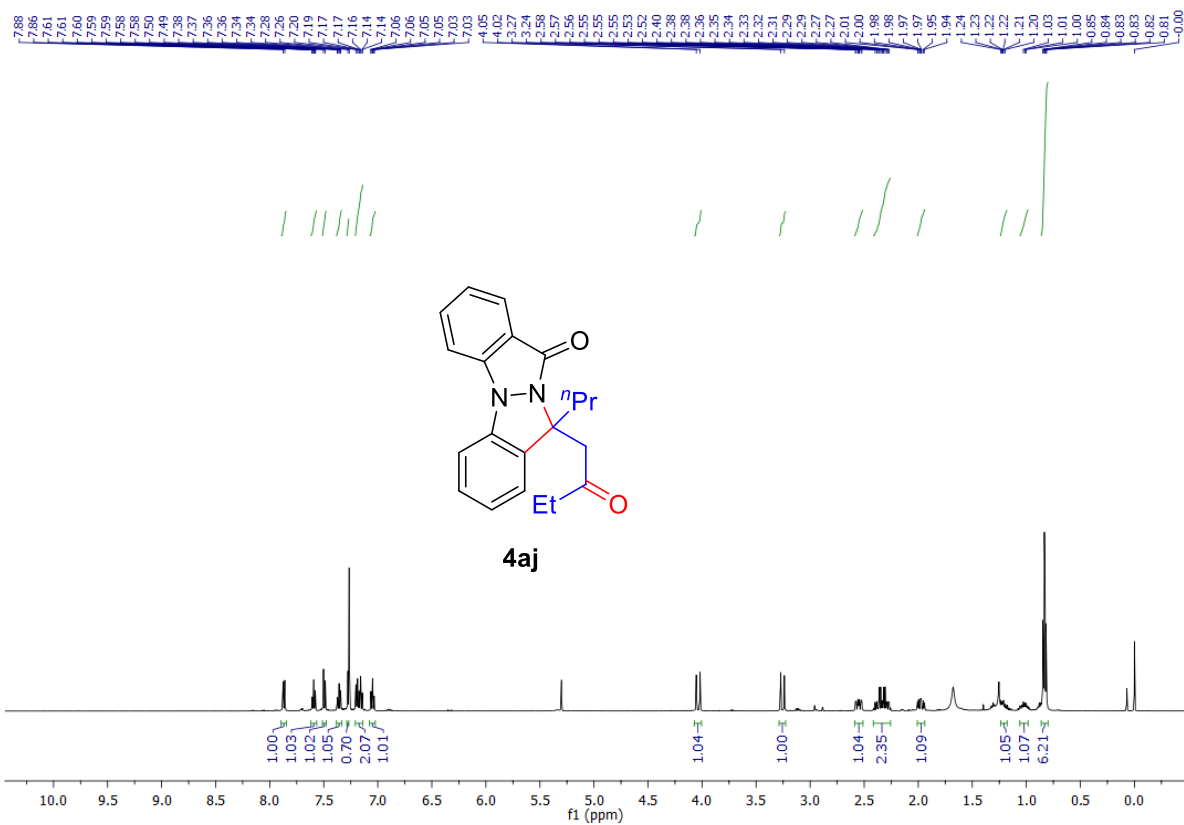

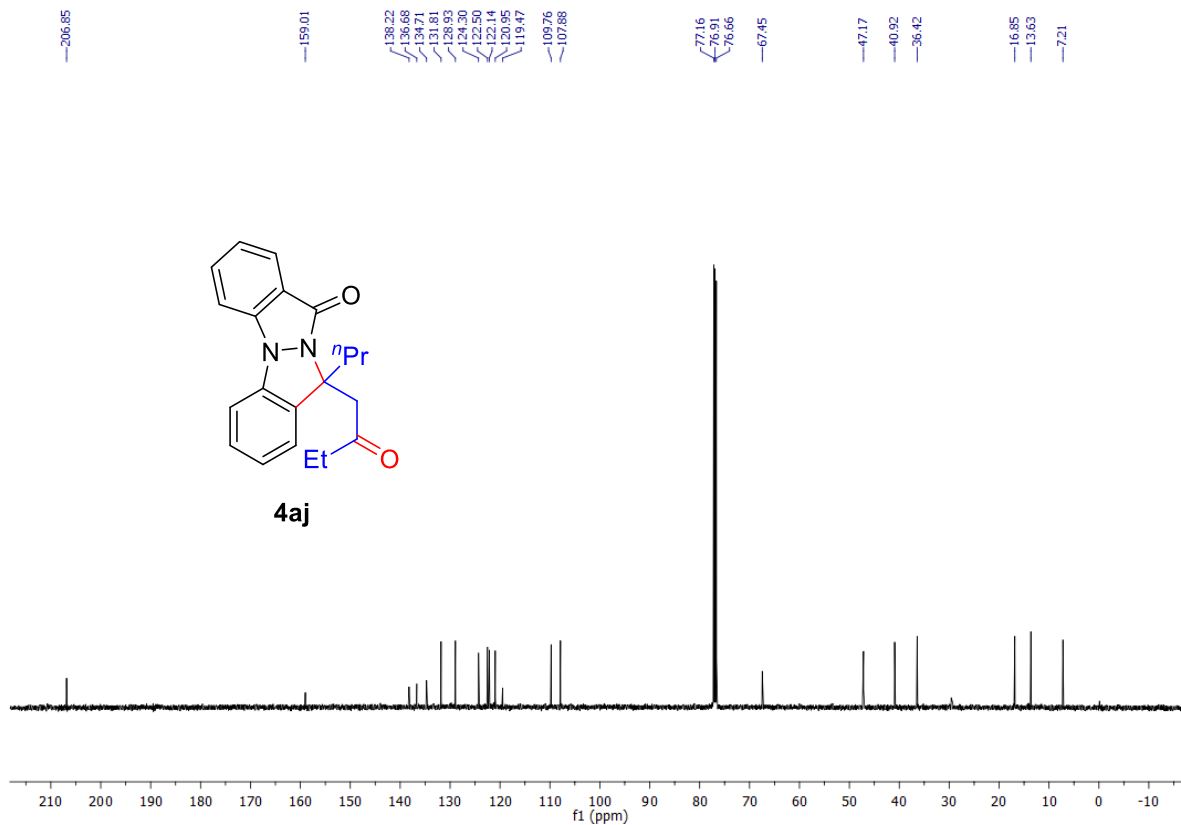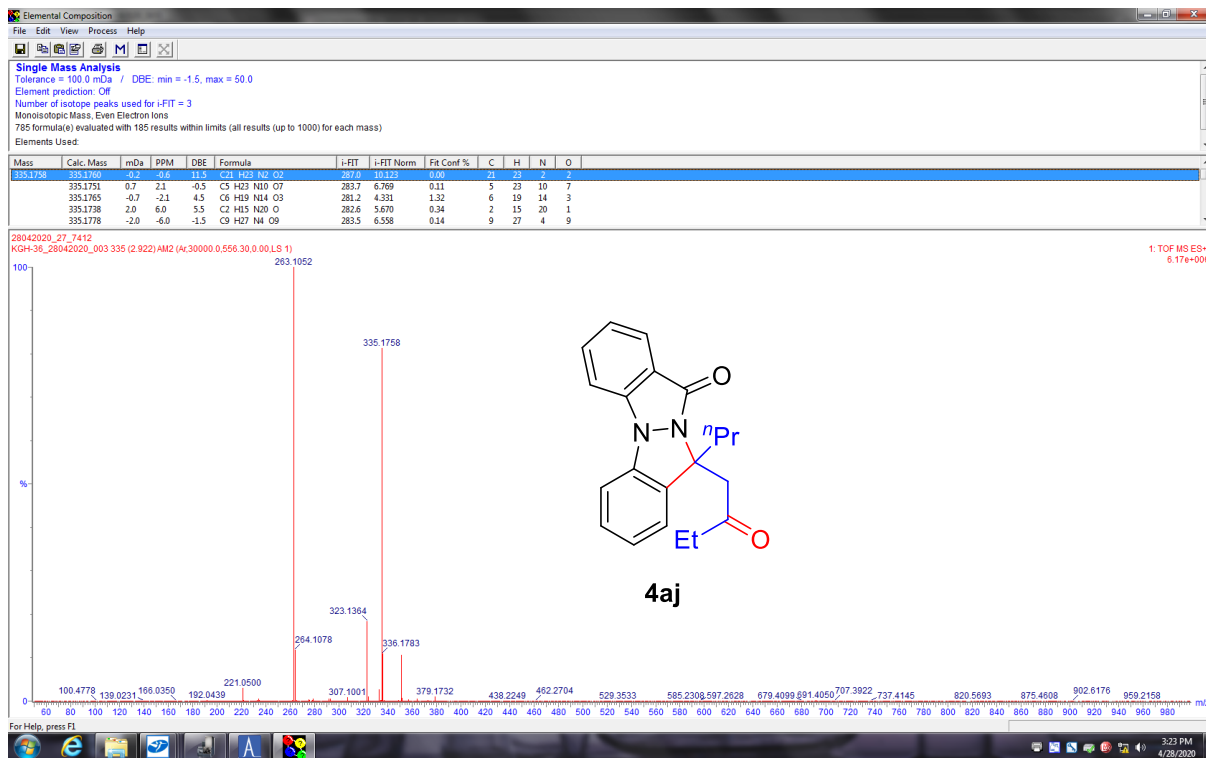







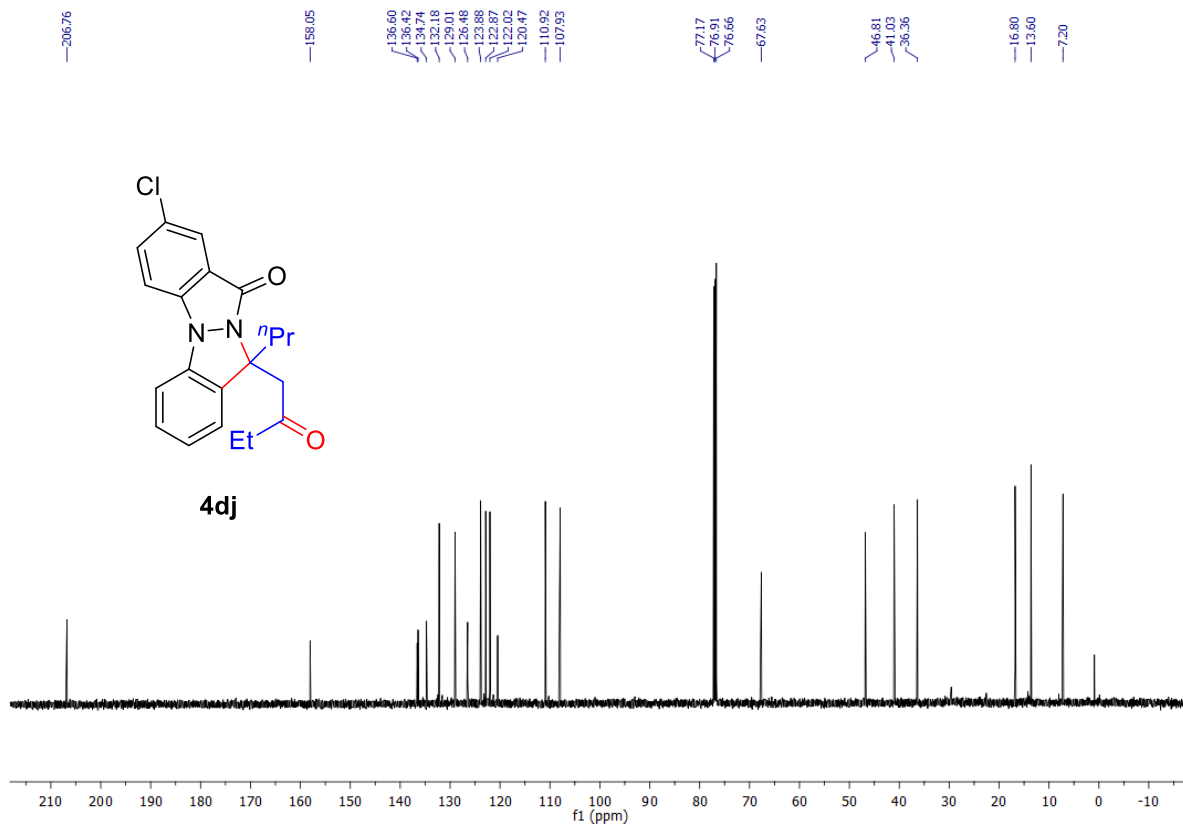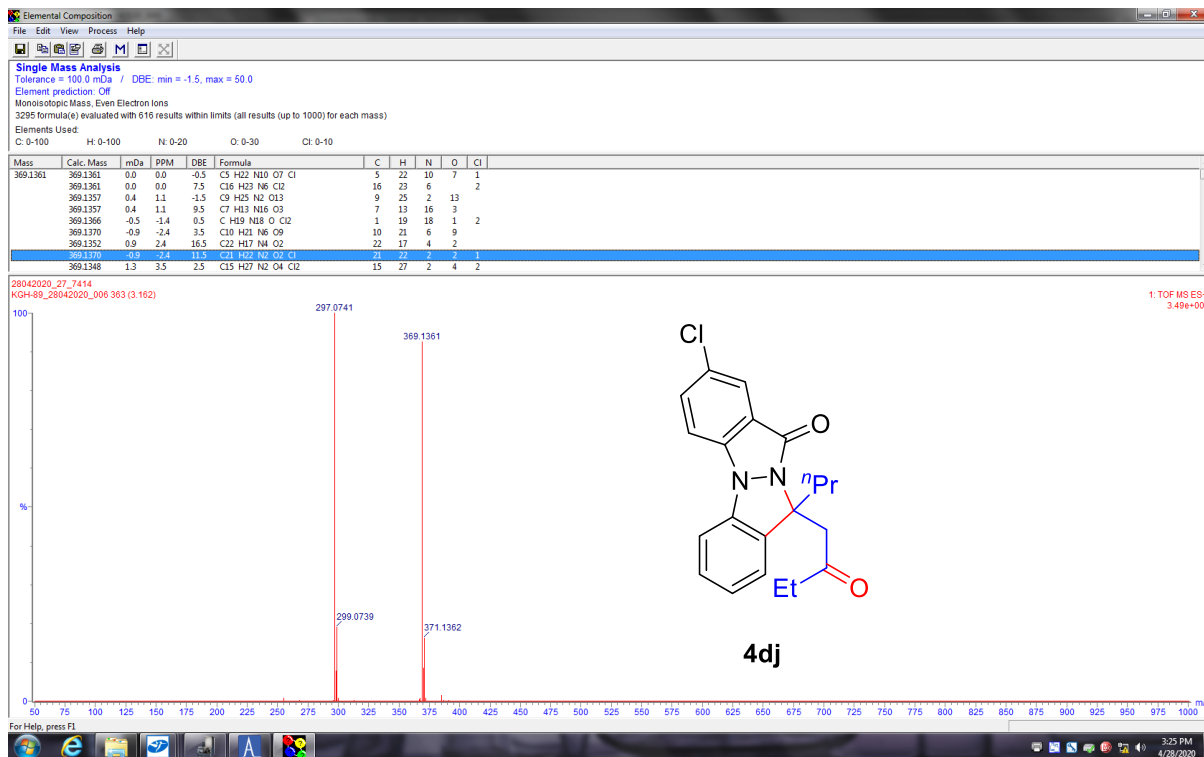

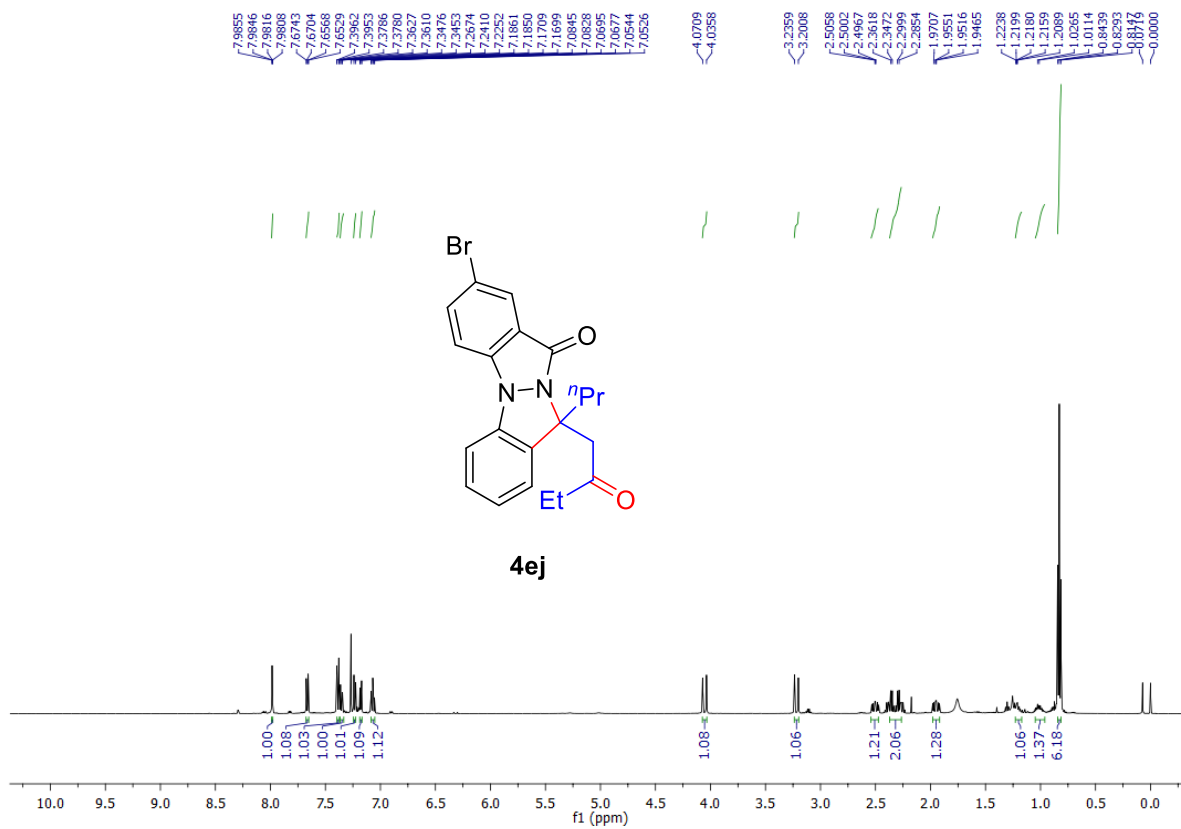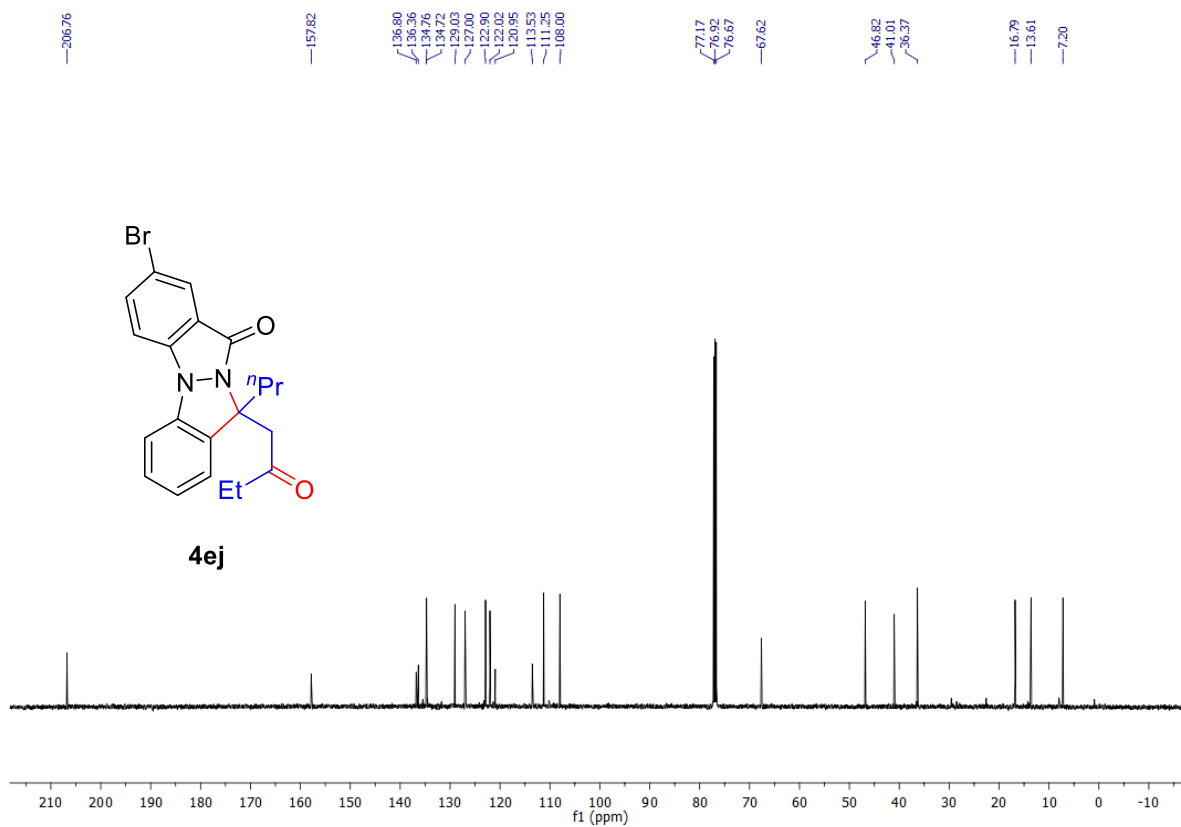

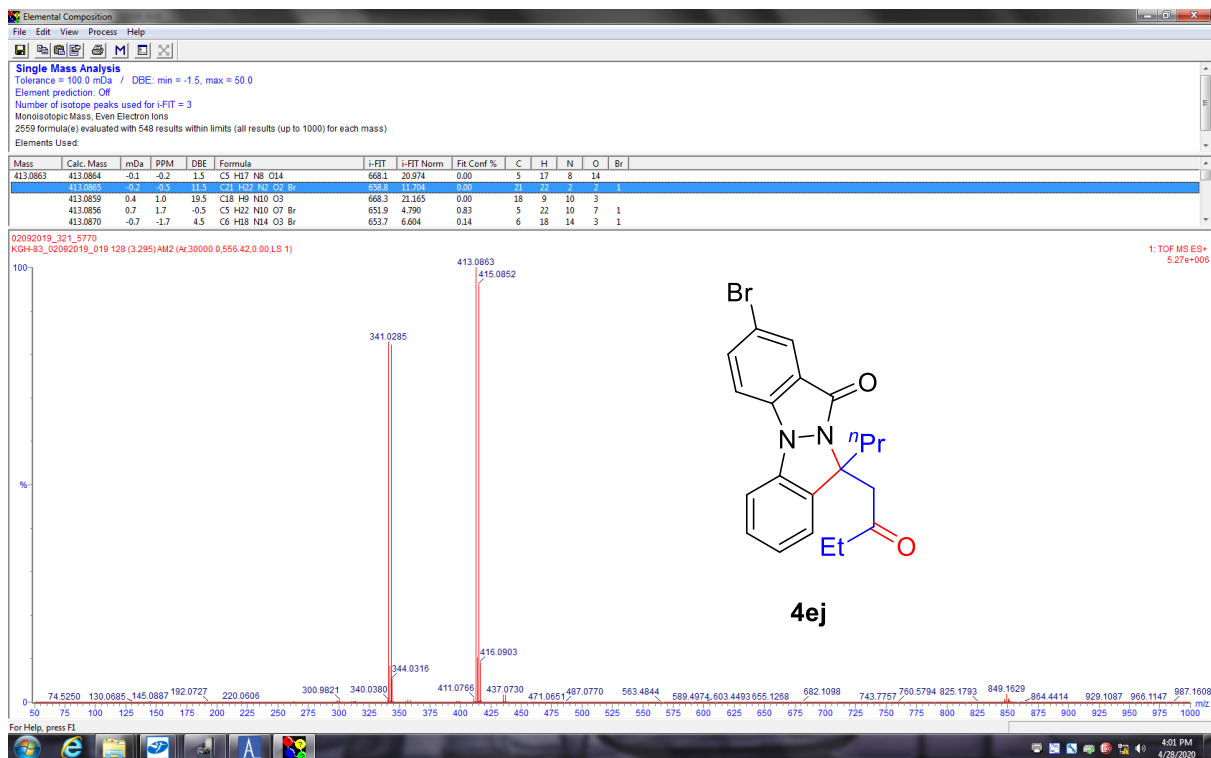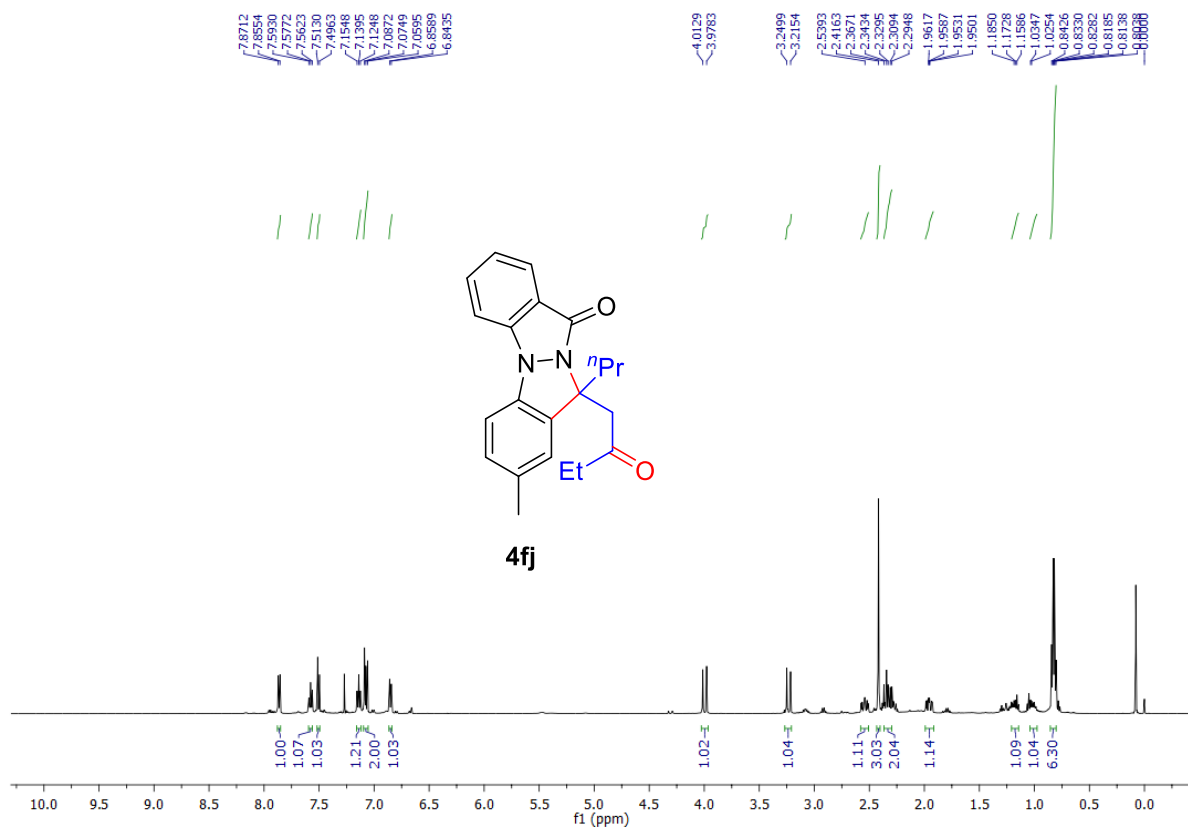

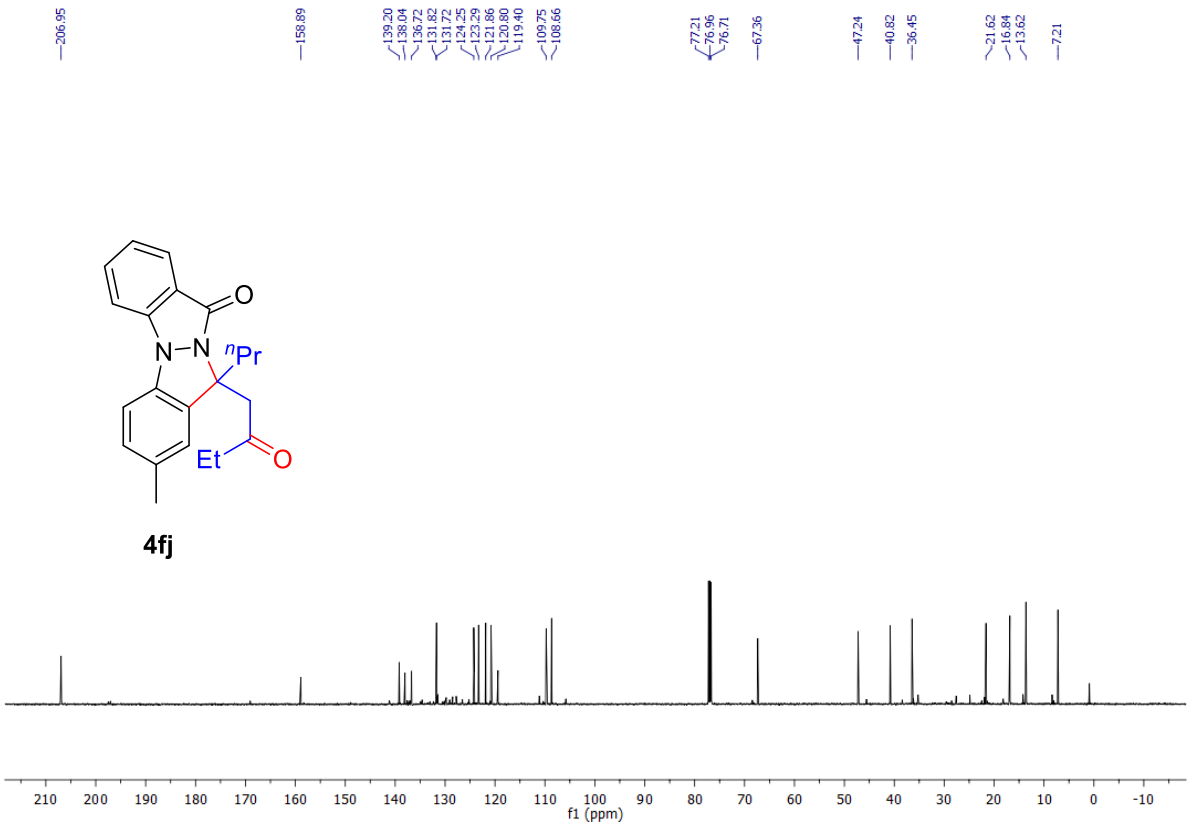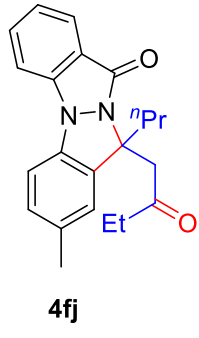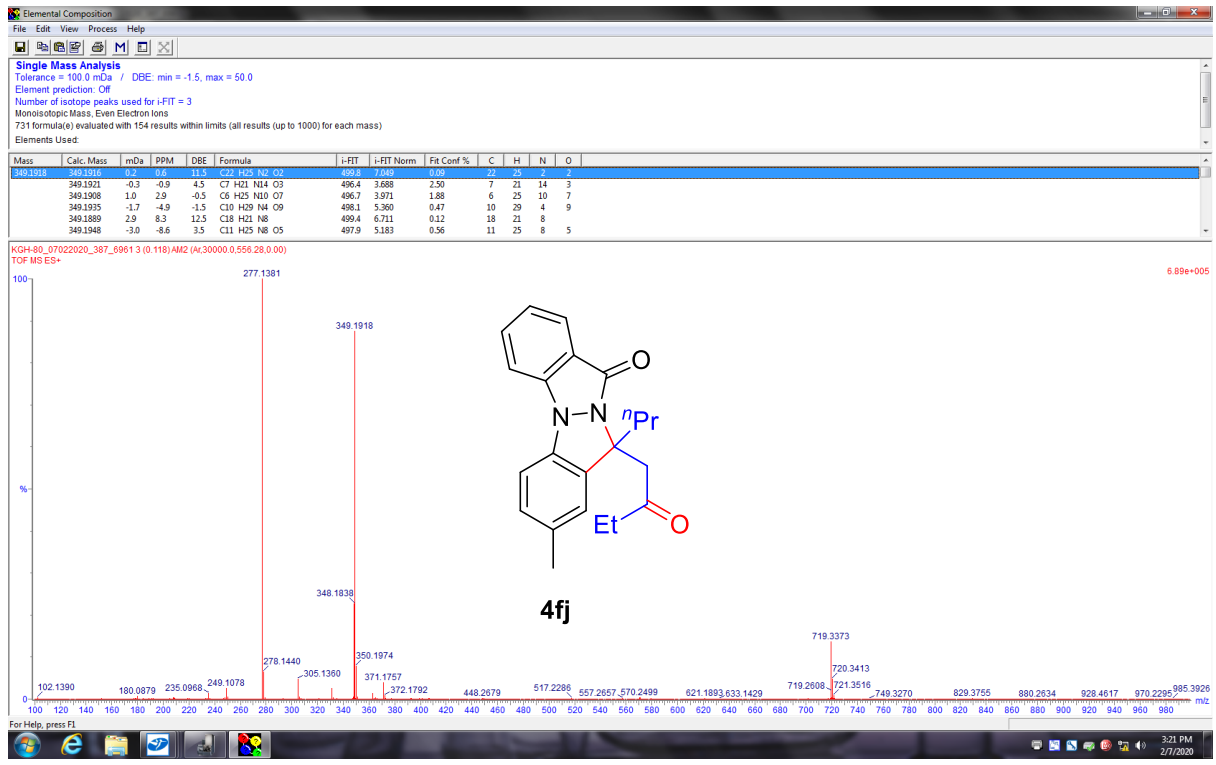

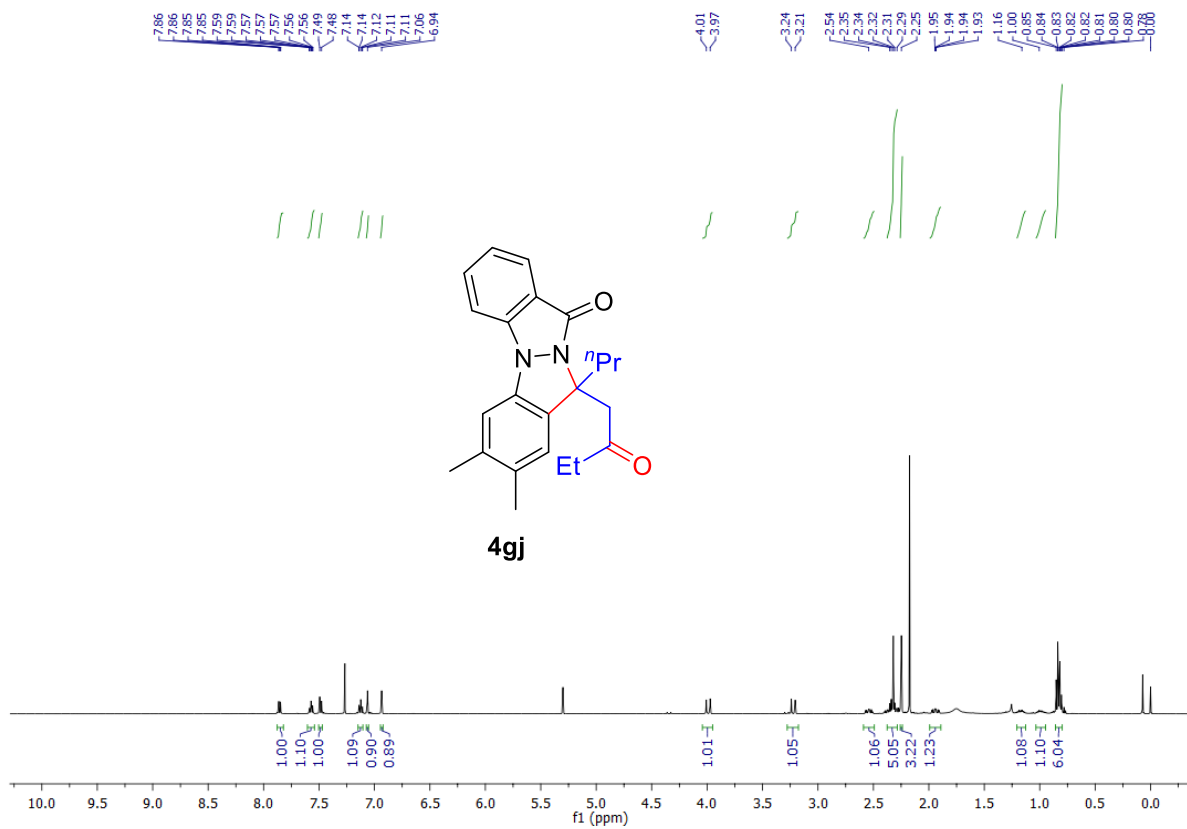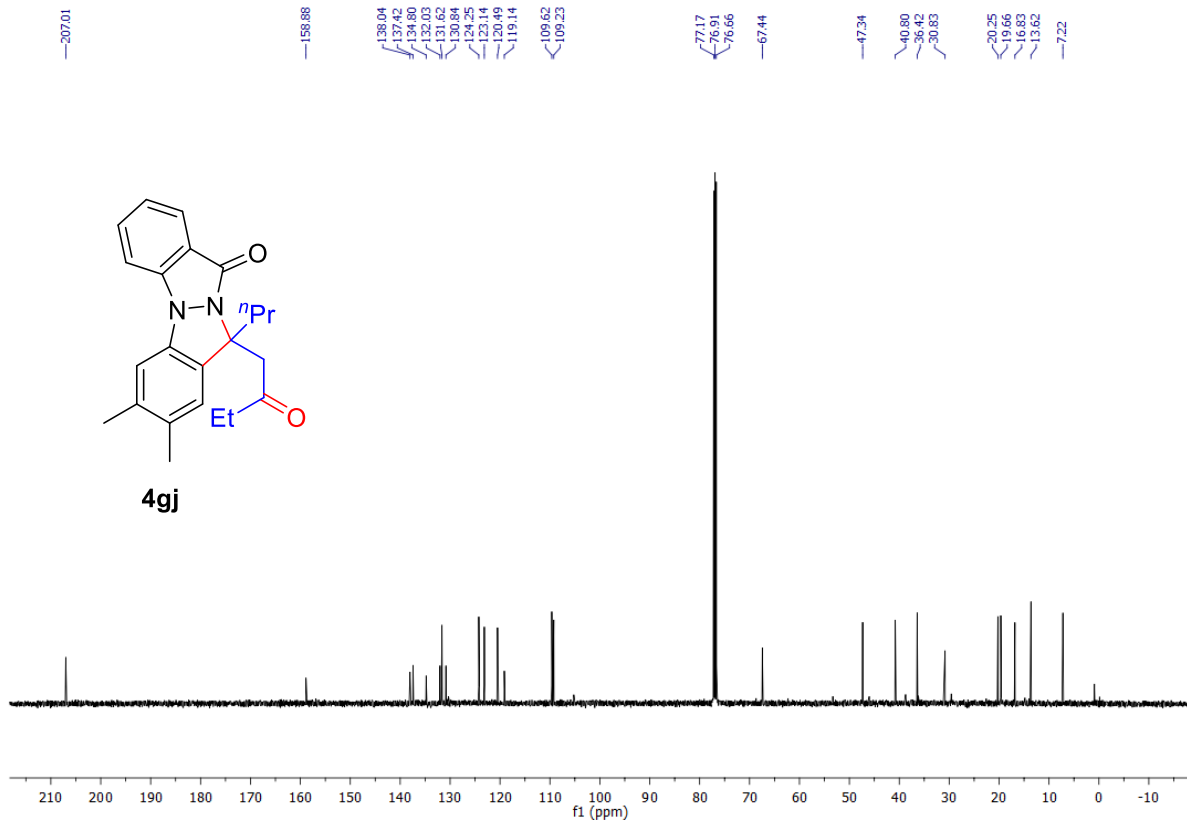

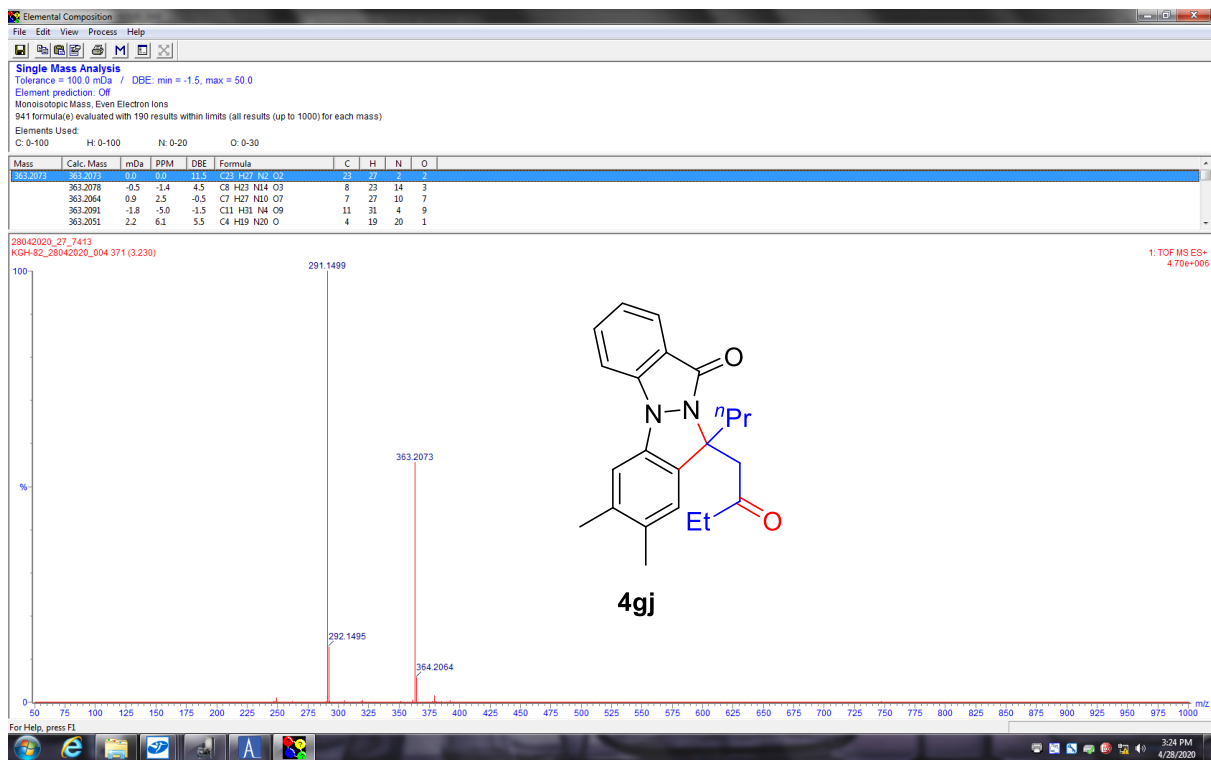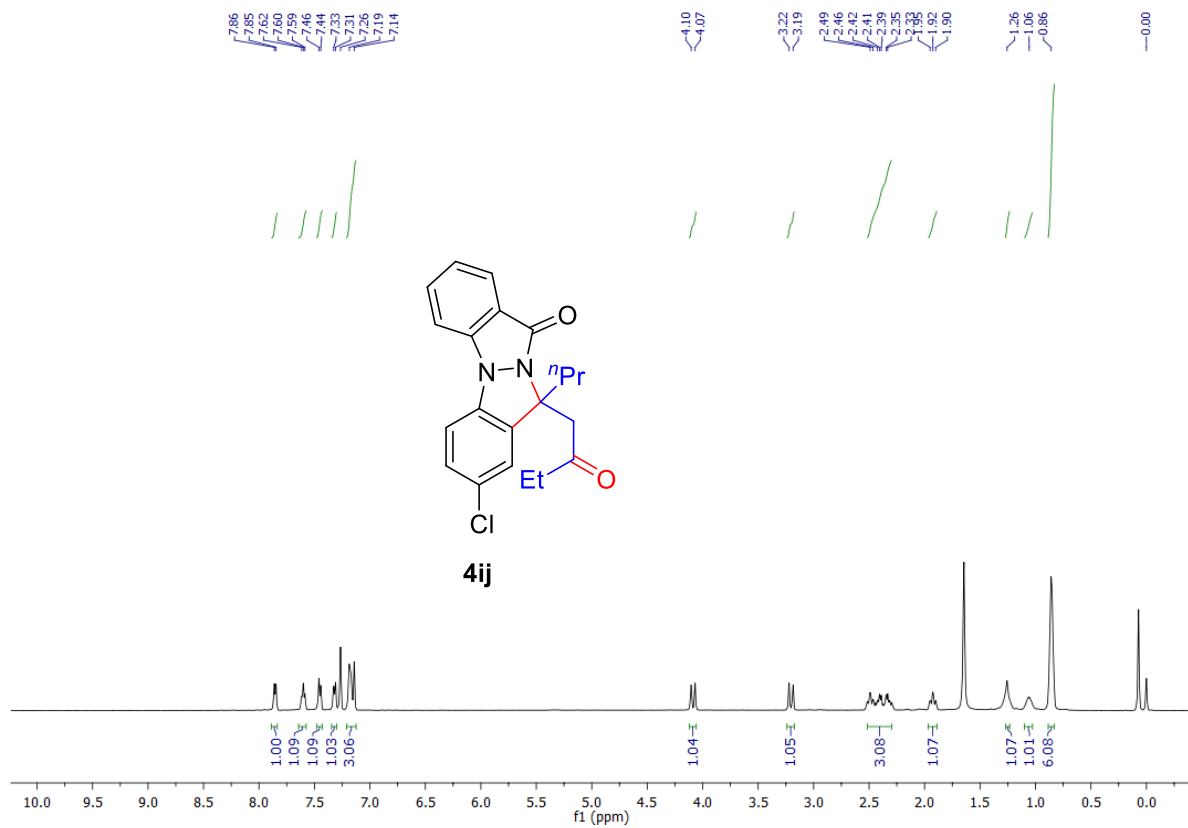



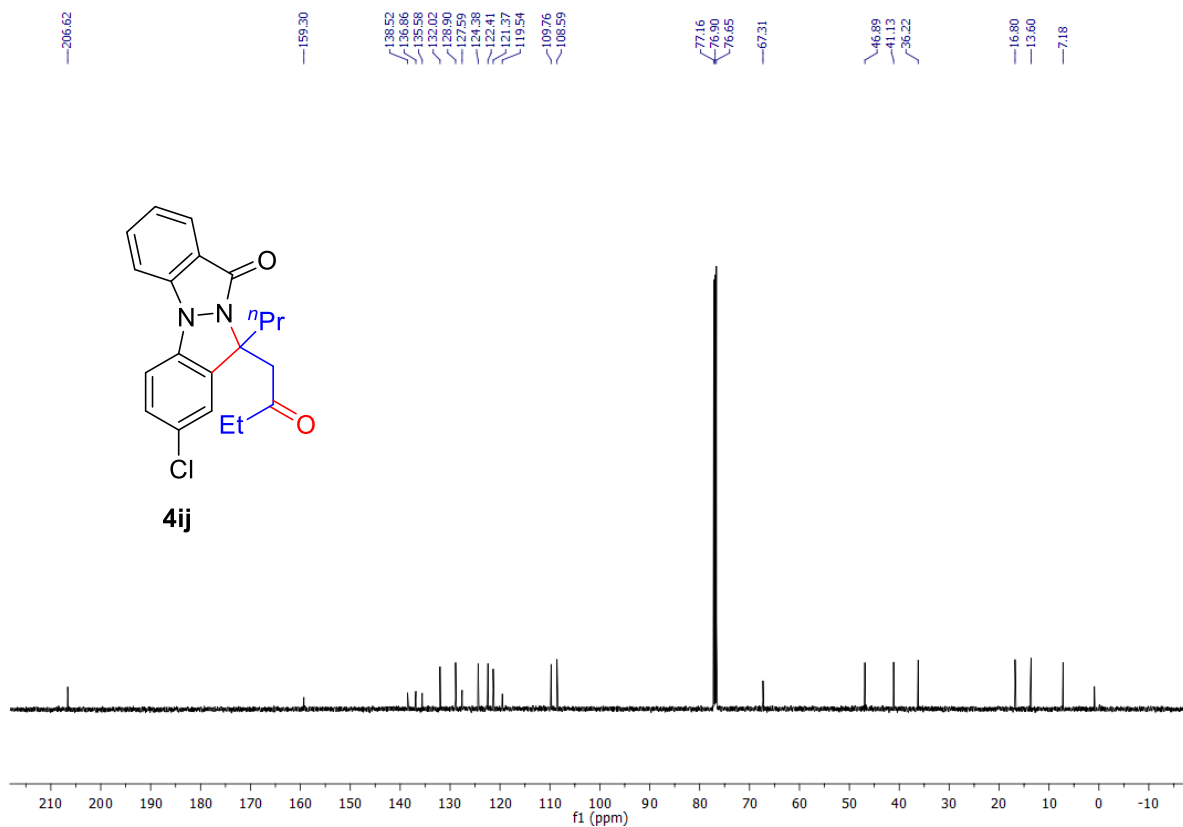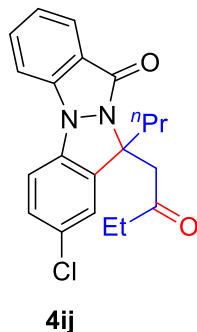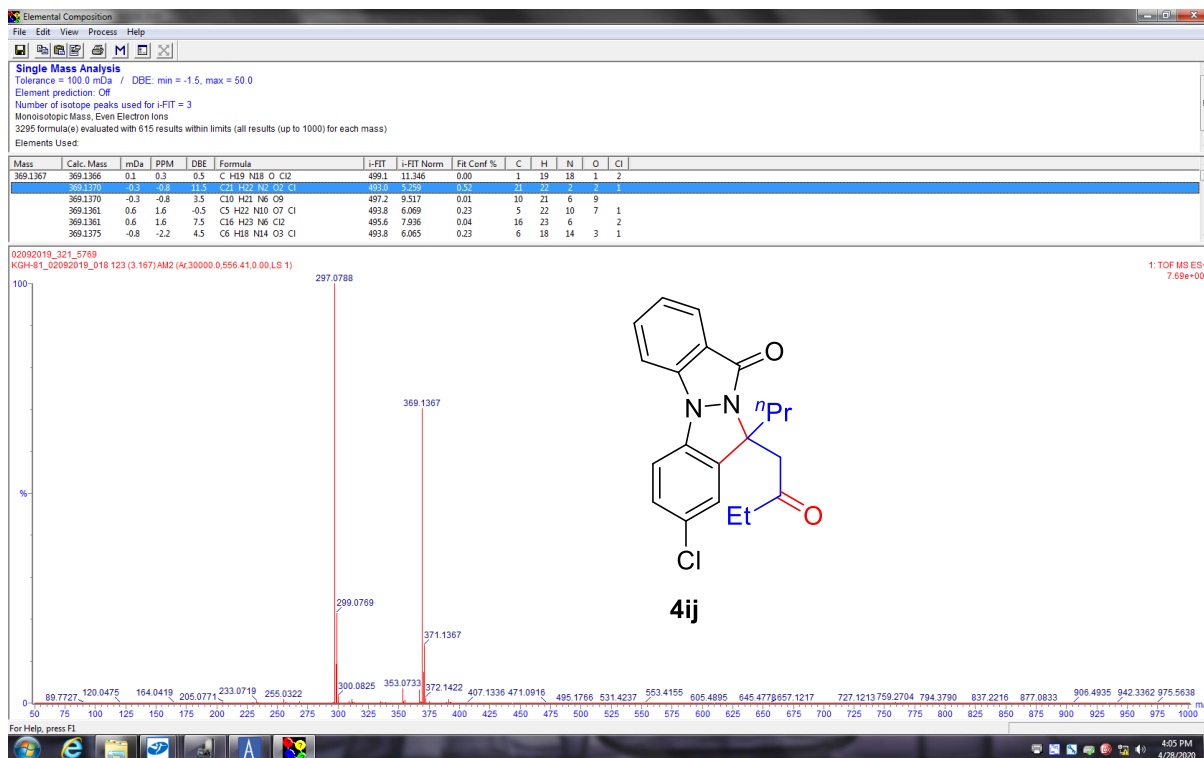

4ak 1H clean 1.fid  
 Name of Sample: KGH-52(P)  
 Spectrum No : 36176

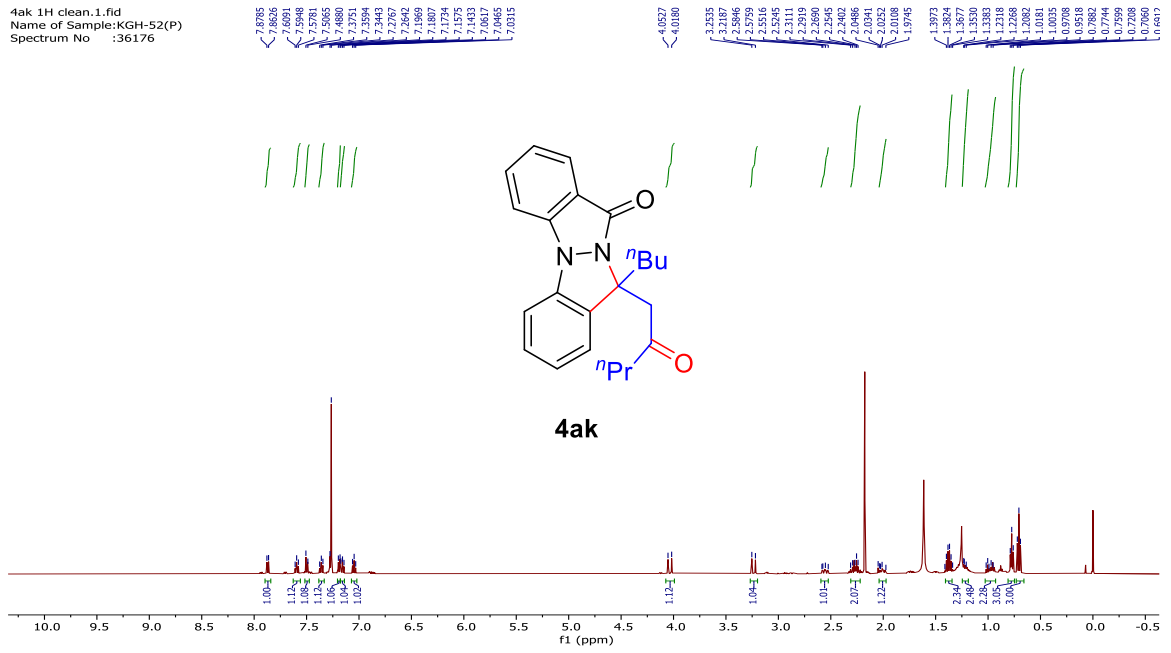

4ak 13C clean 1.fid  
 Name of Sample: KGH-52(P)  
 Spectrum No : 36177

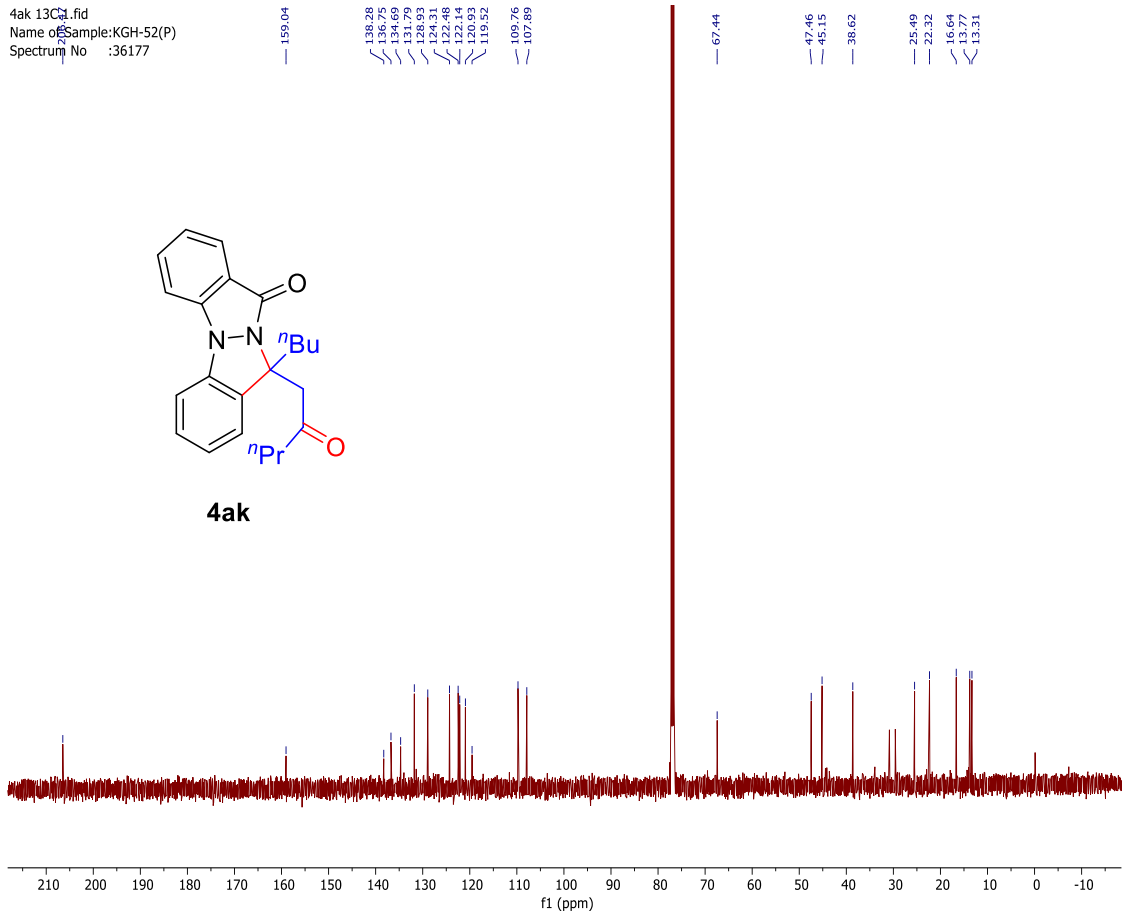

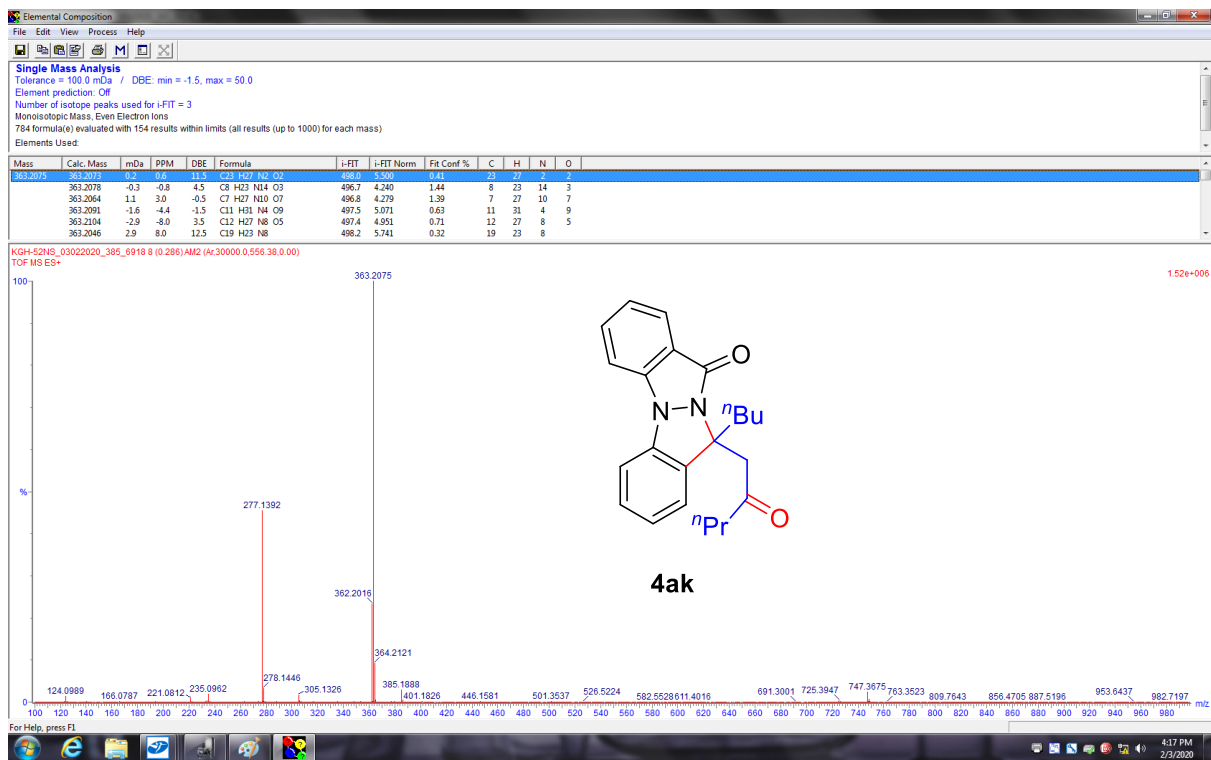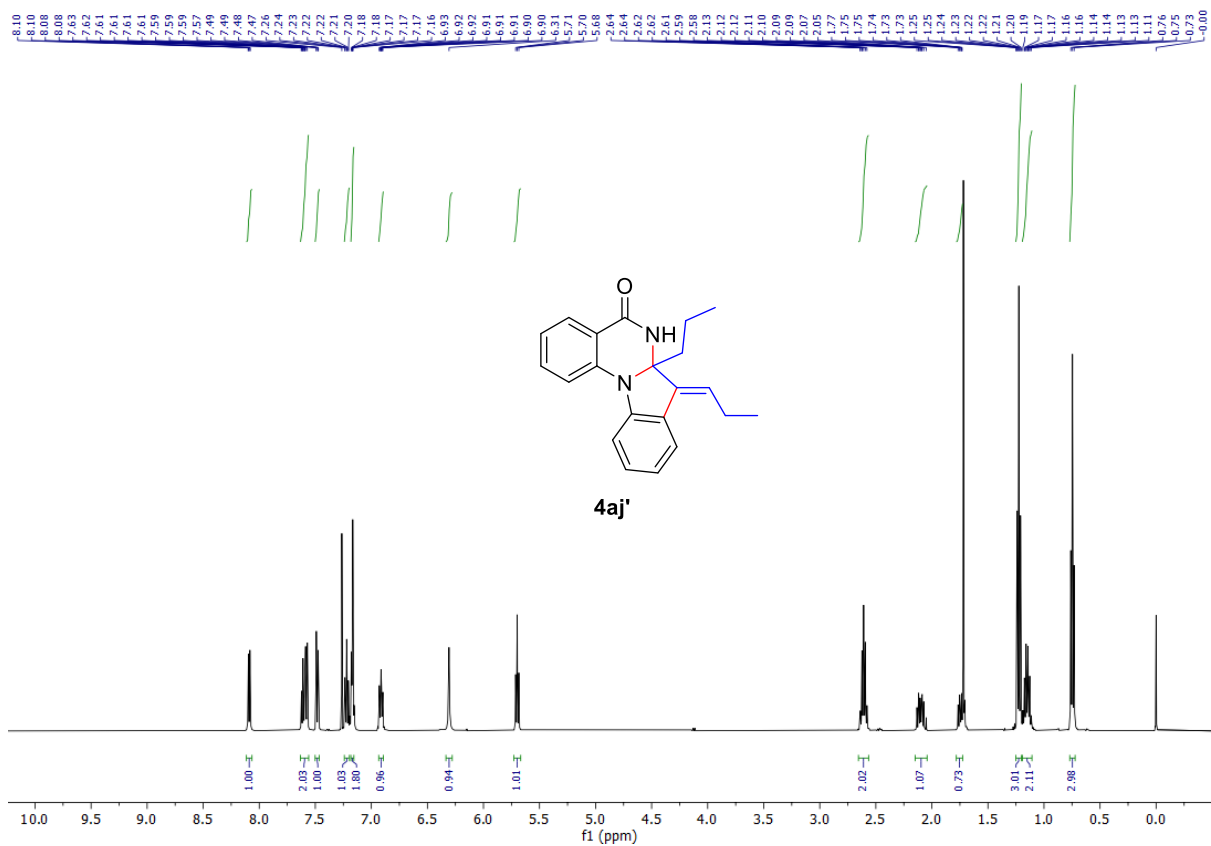

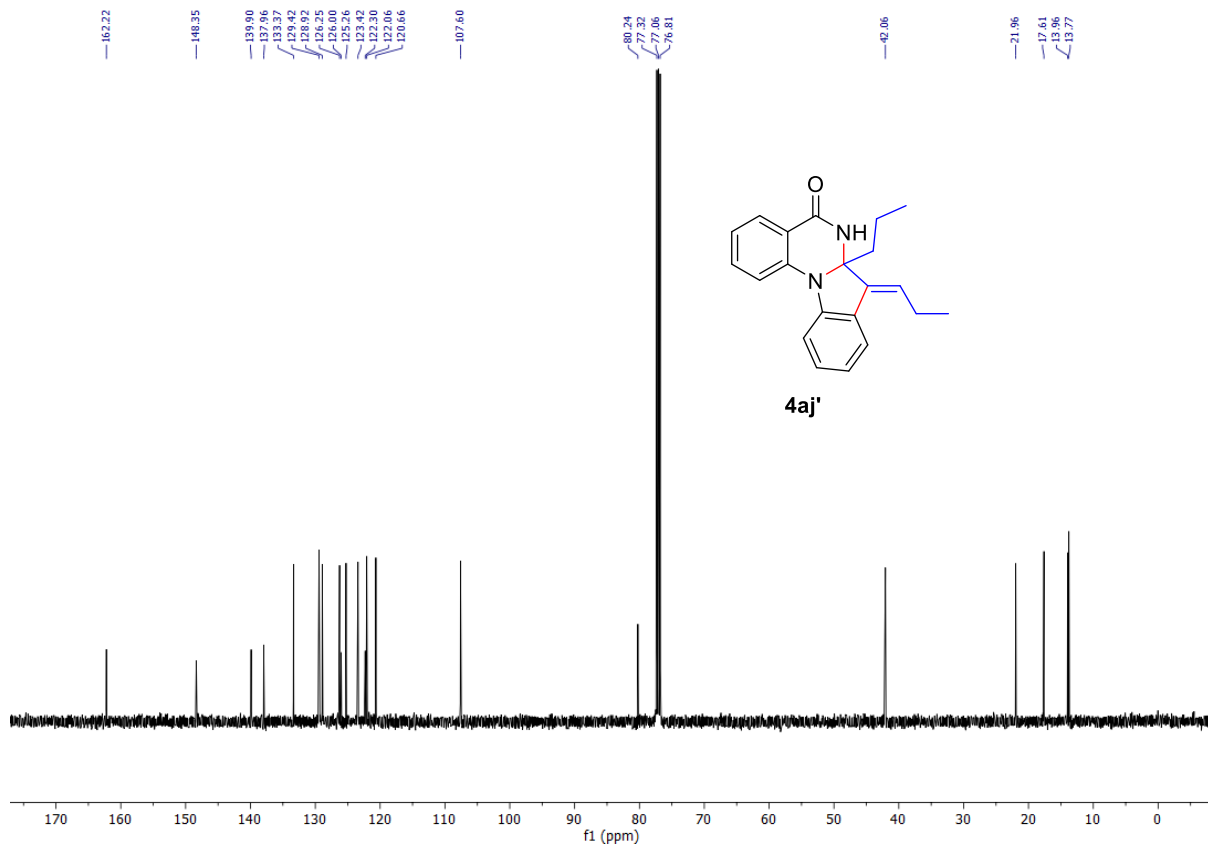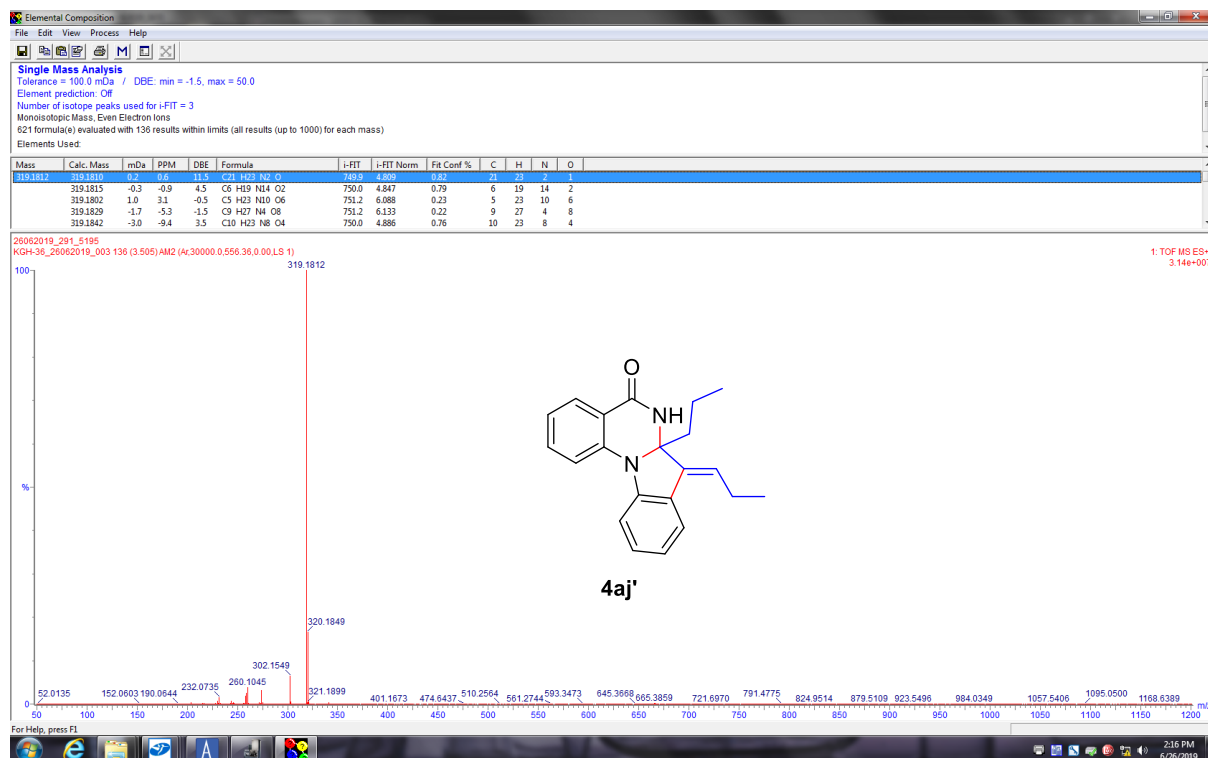



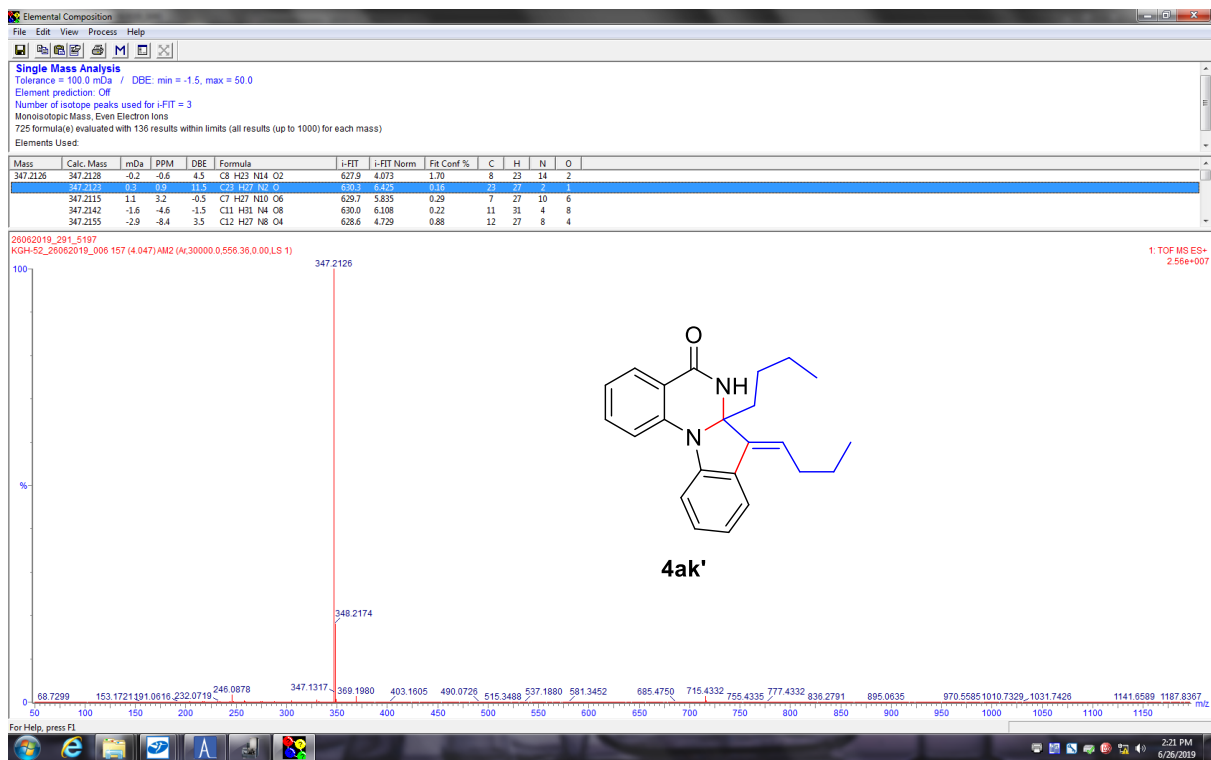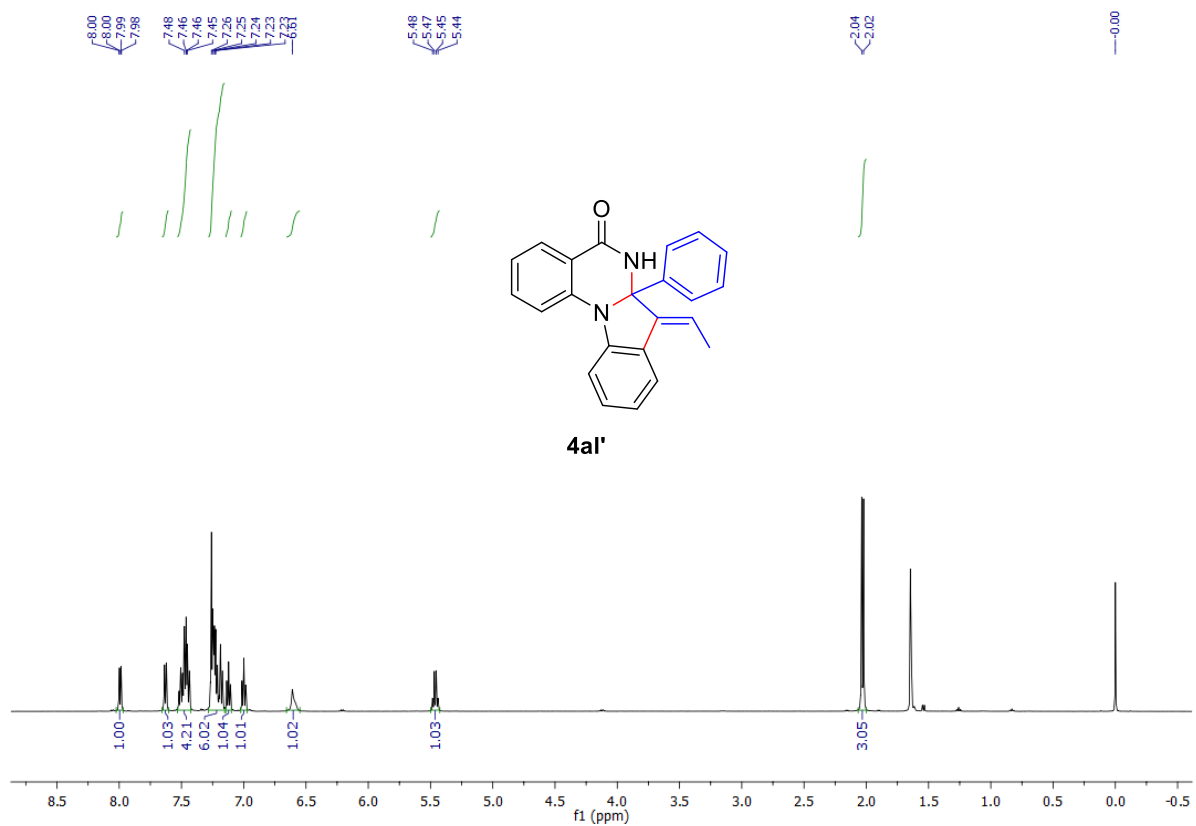

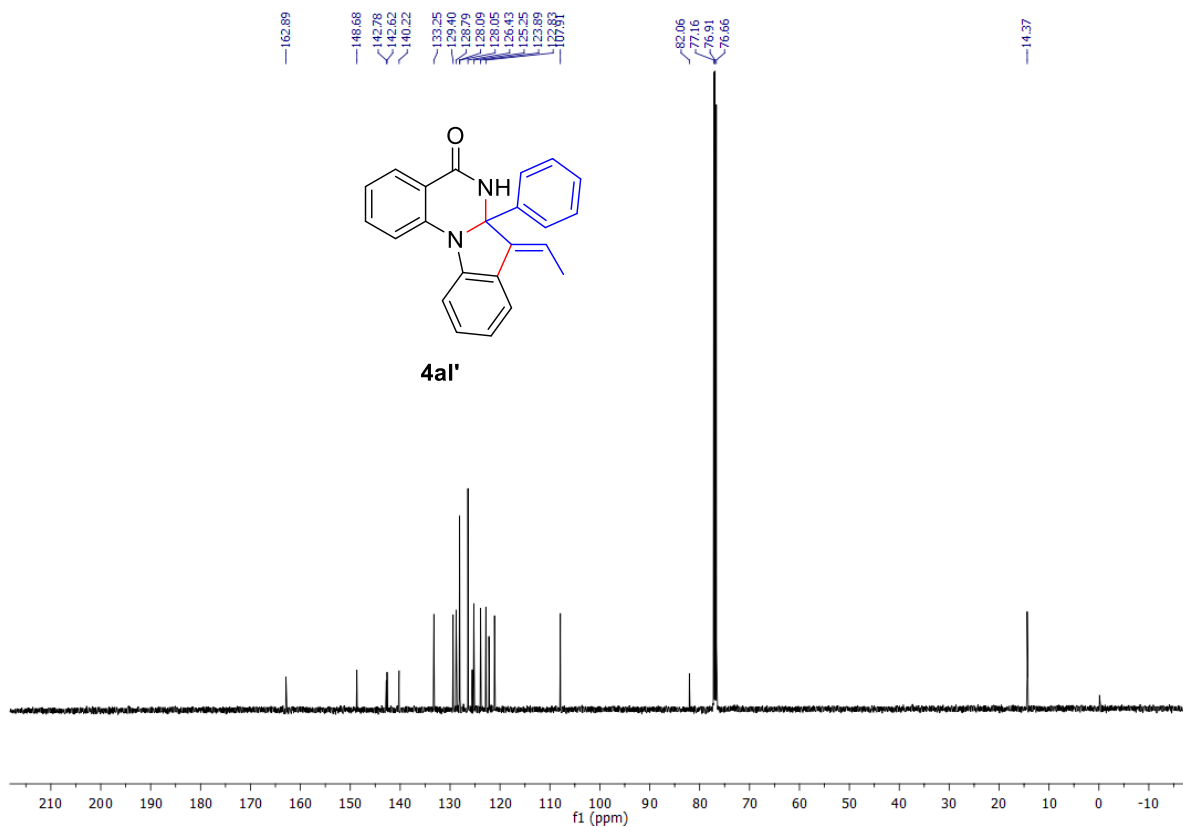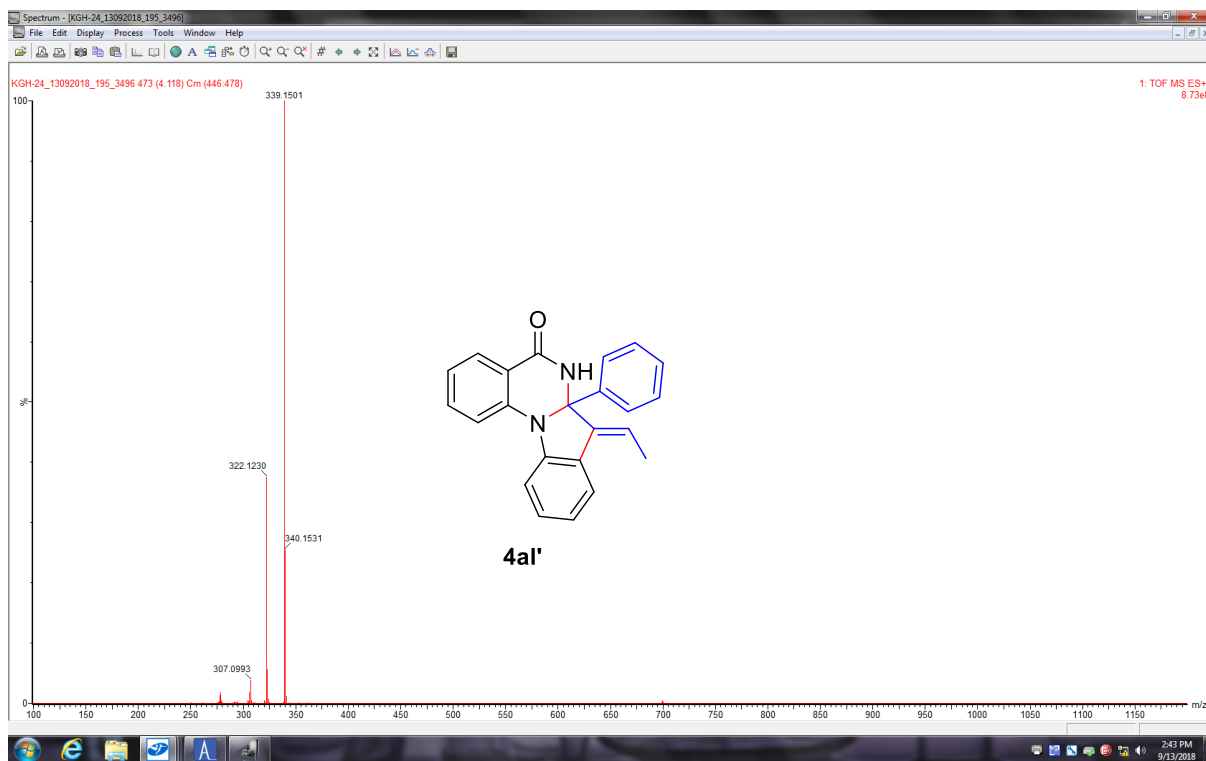

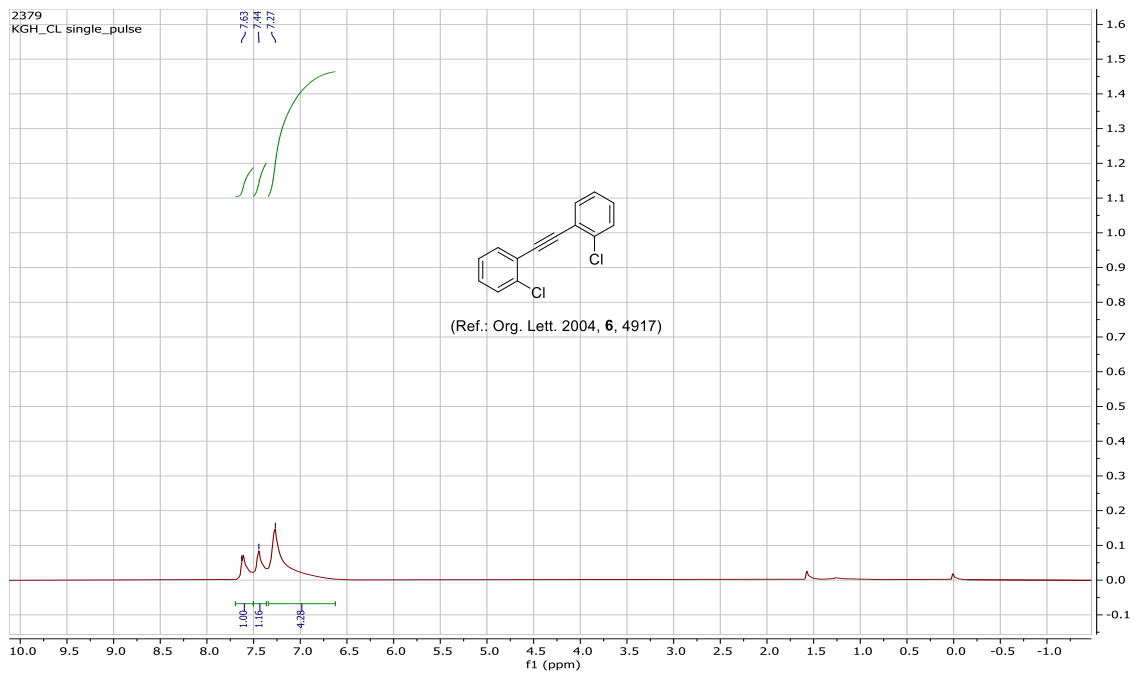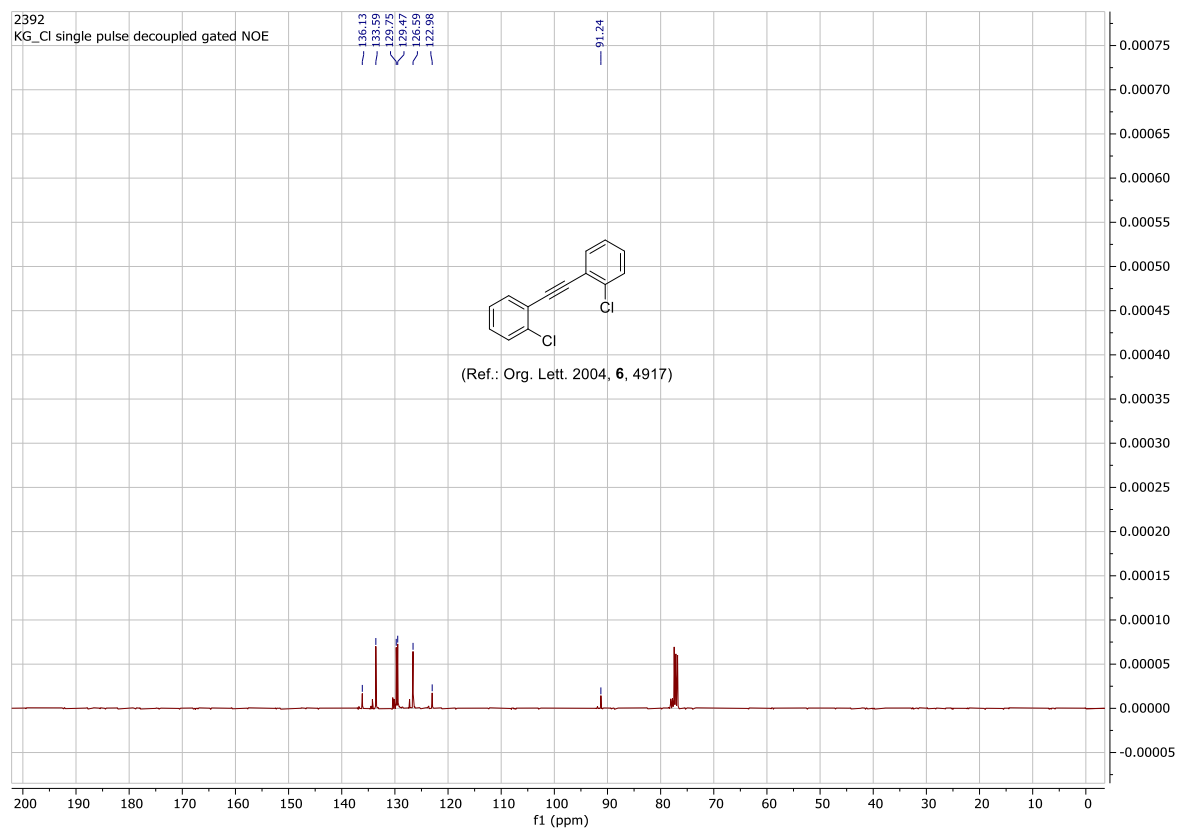



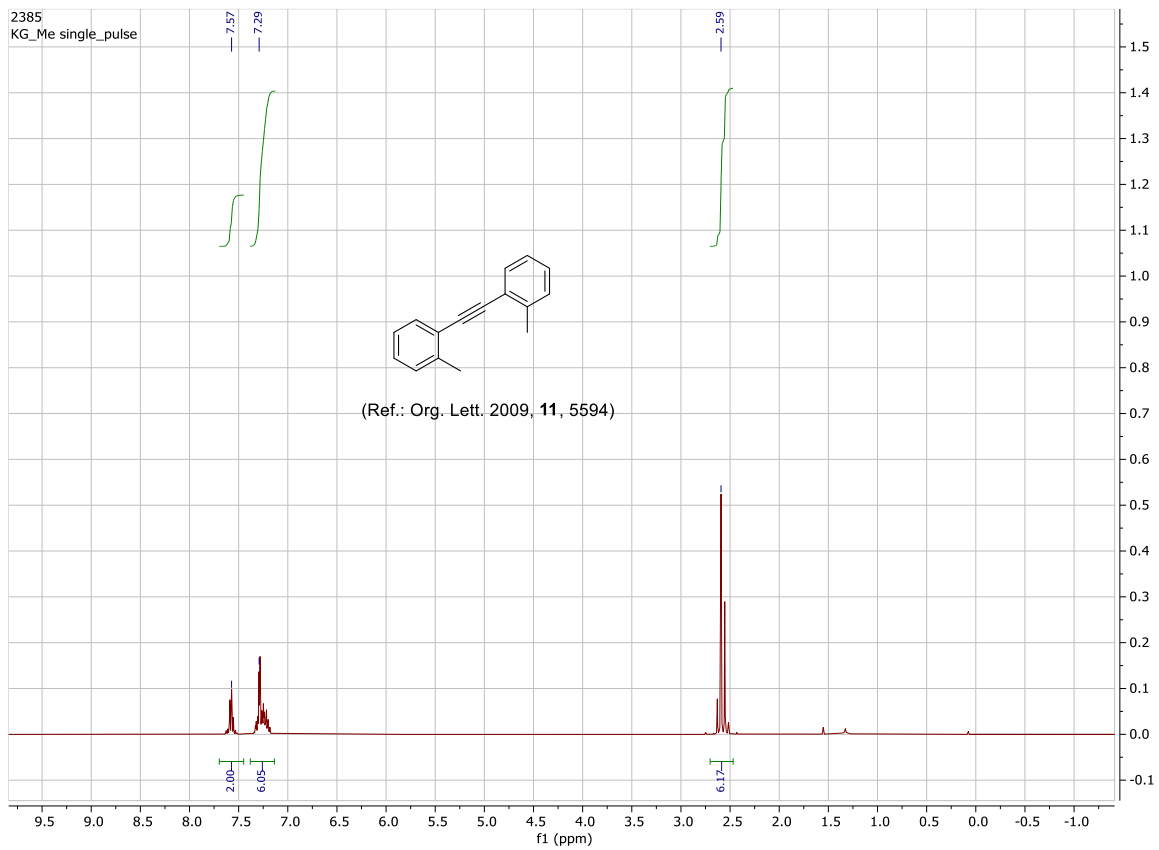

Supplement: d0cc07419e1.pdf [file d0cc07419e1.pdf]
